# Supplementary material for: TECPR2 Associated Neuroaxonal Dystrophy in Spanish Water Dogs
Source: PubMed Central journal article supplement (PMC4640708; doi:10.1371/journal.pone.0141824), 2015-11-10

# Parametric Analysis for recessive

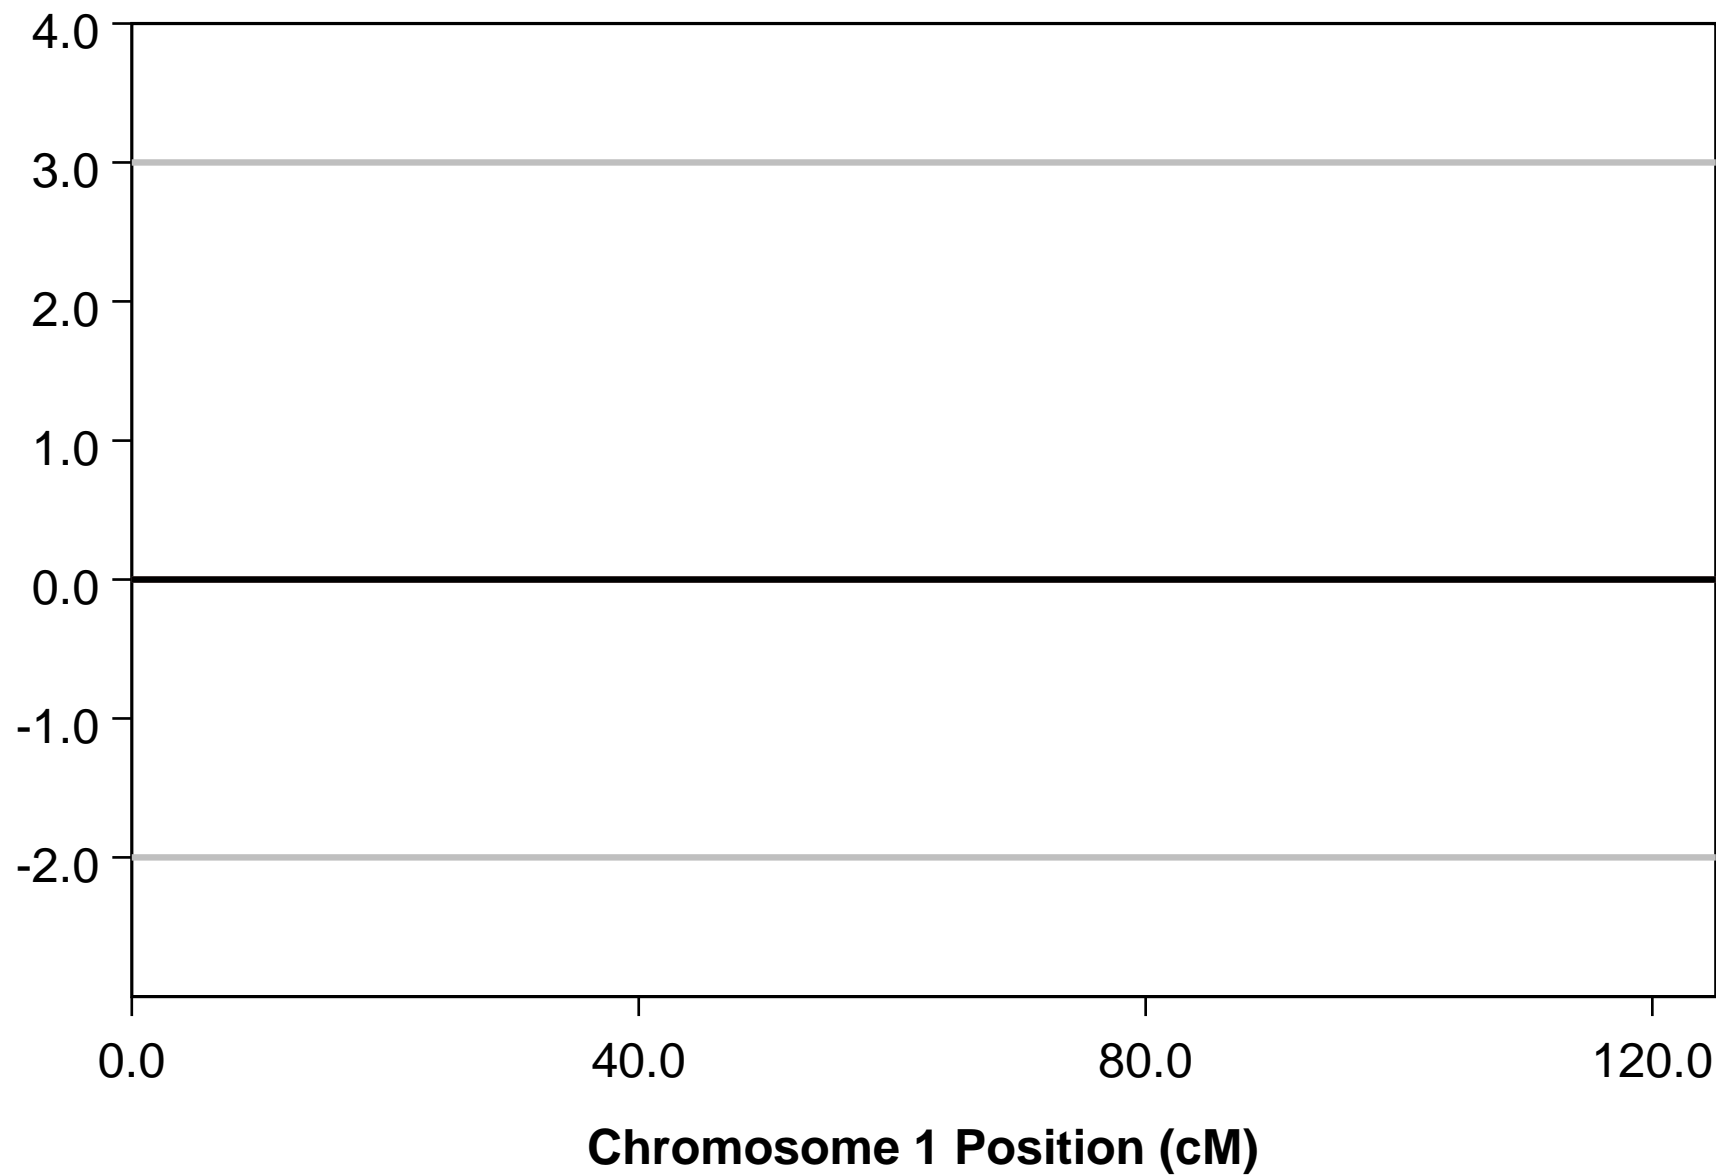

# Parametric Analysis for recessive

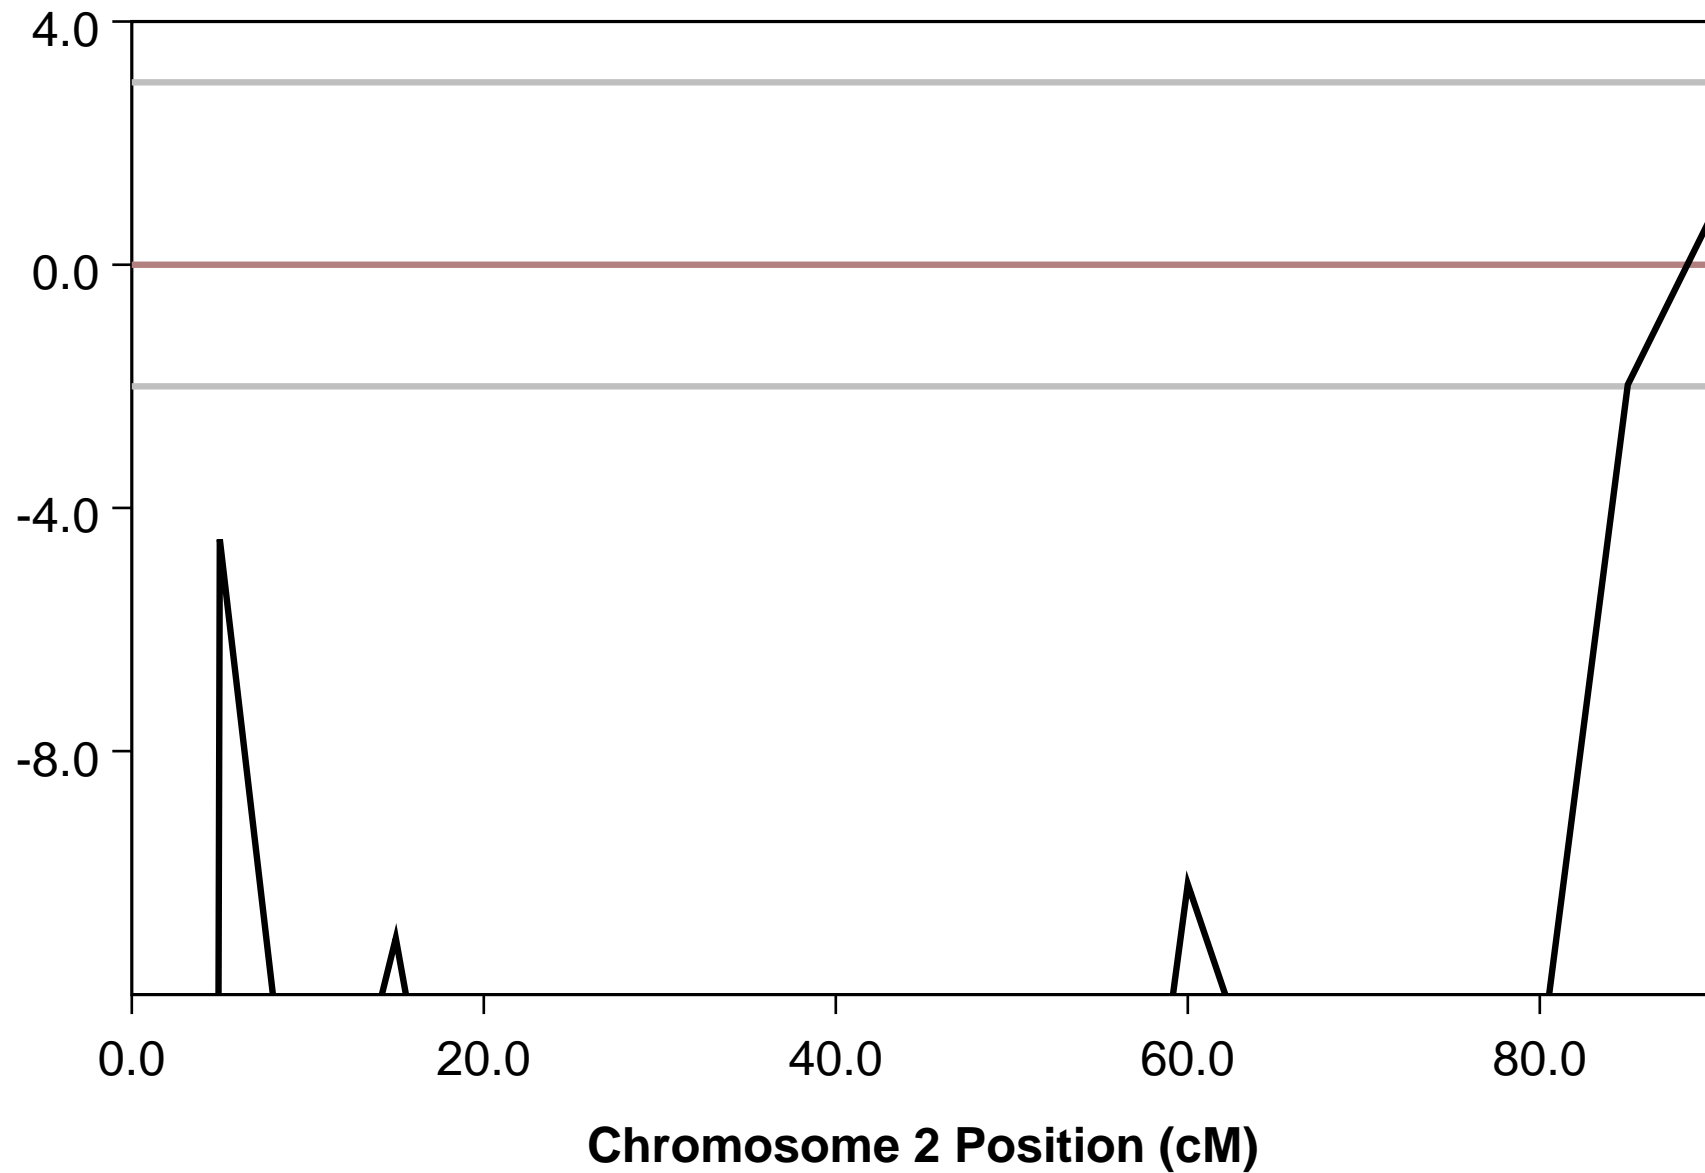

# Parametric Analysis for recessive

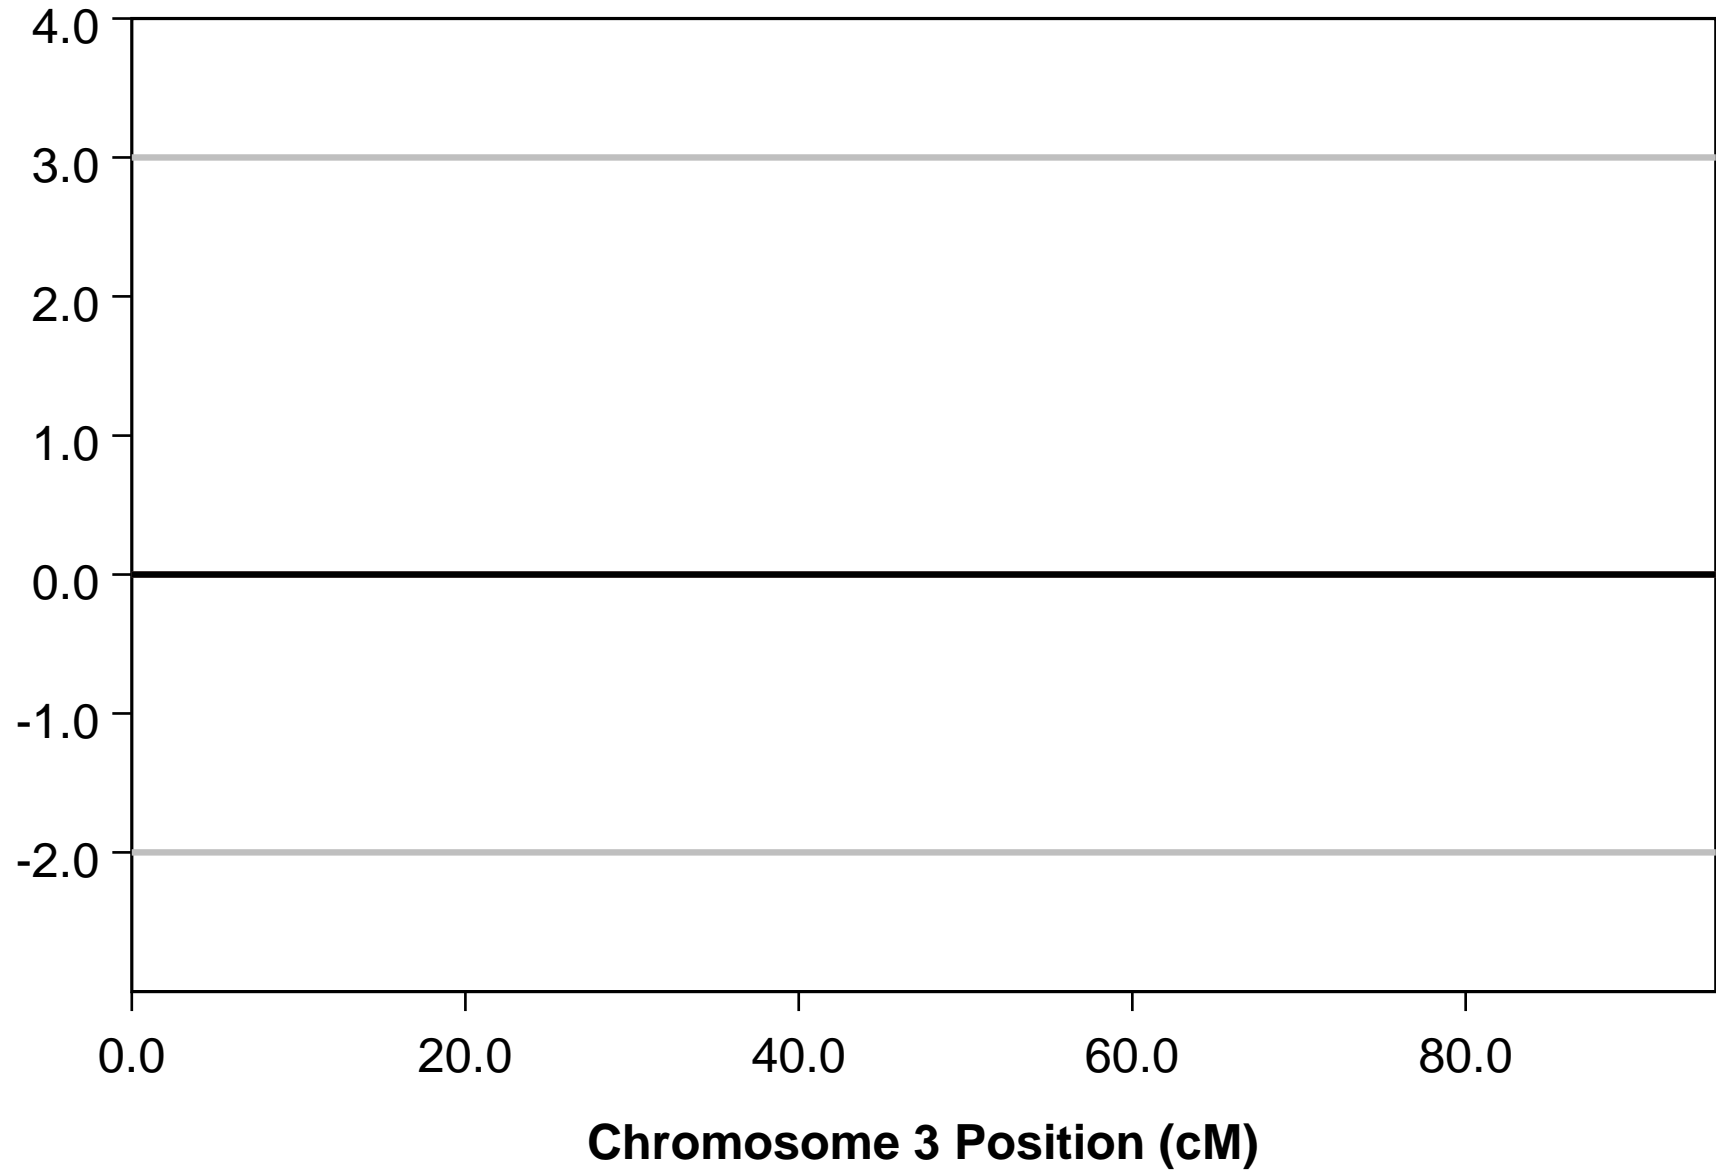

# Parametric Analysis for recessive

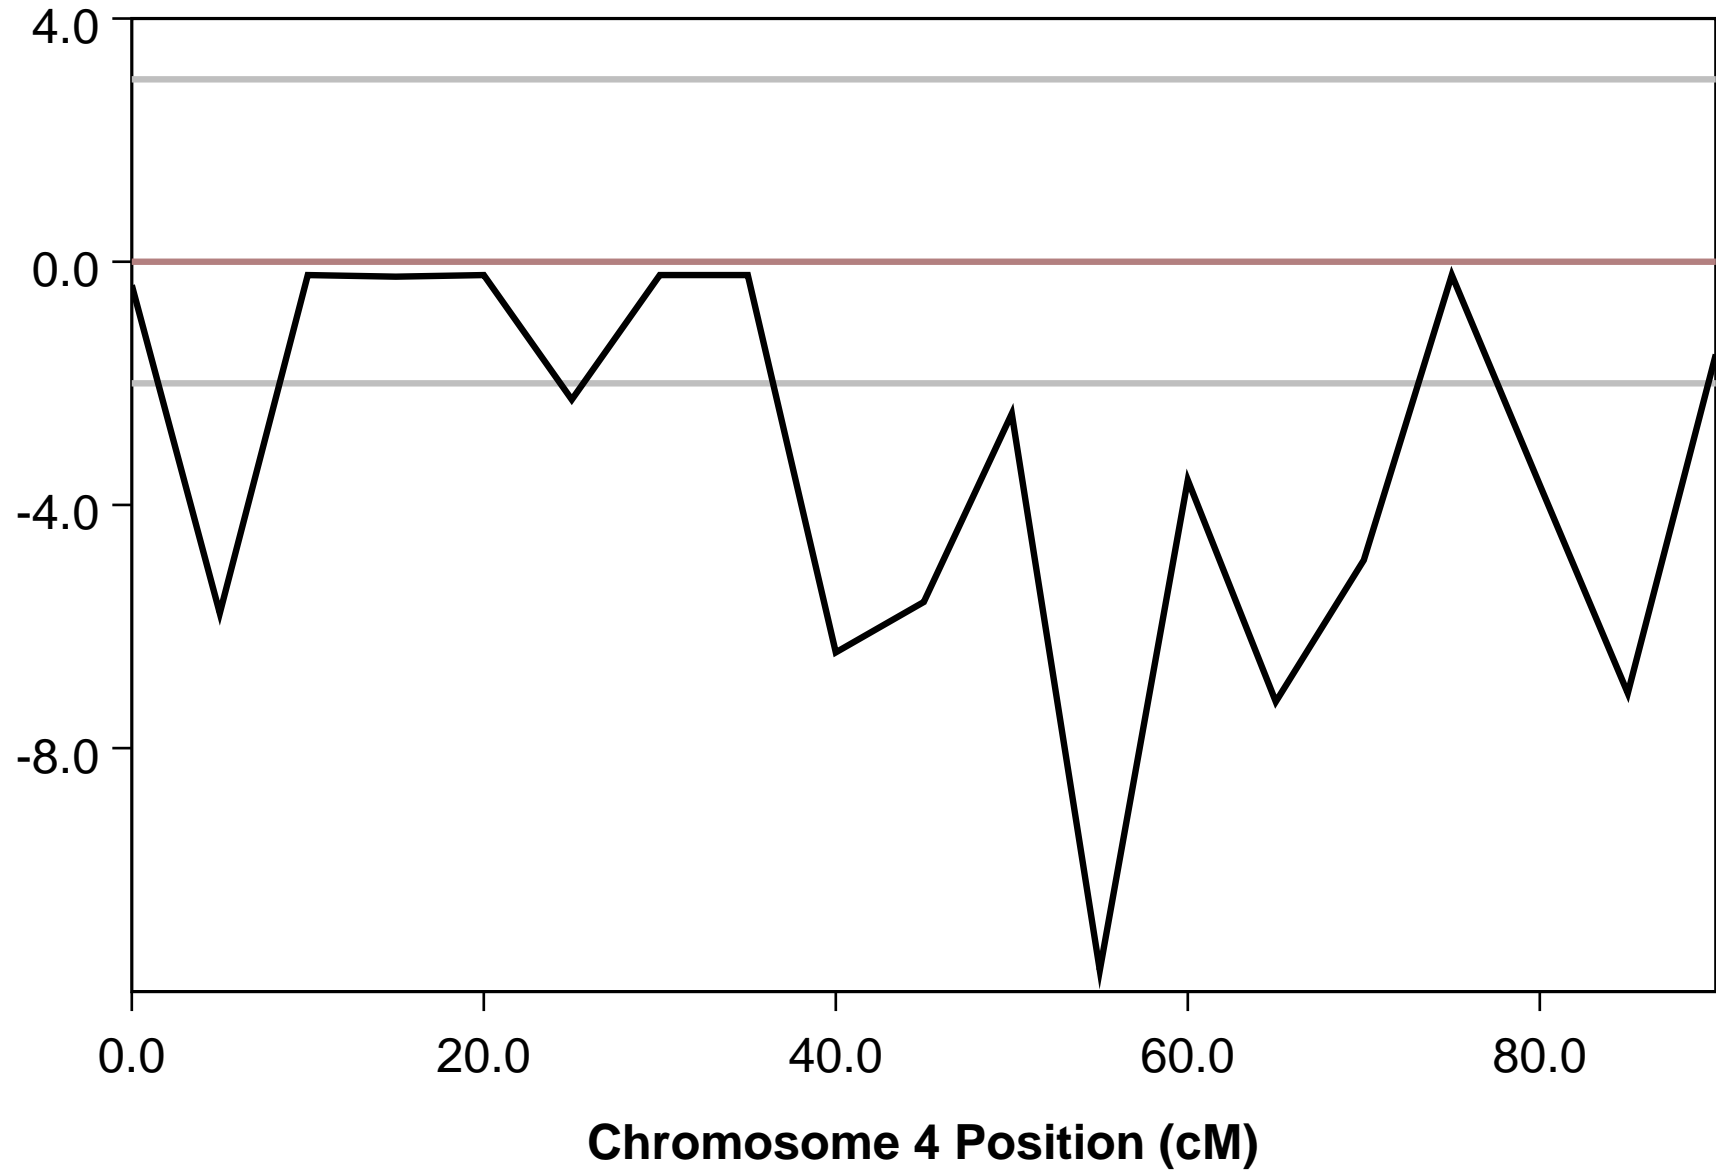

# Parametric Analysis for recessive

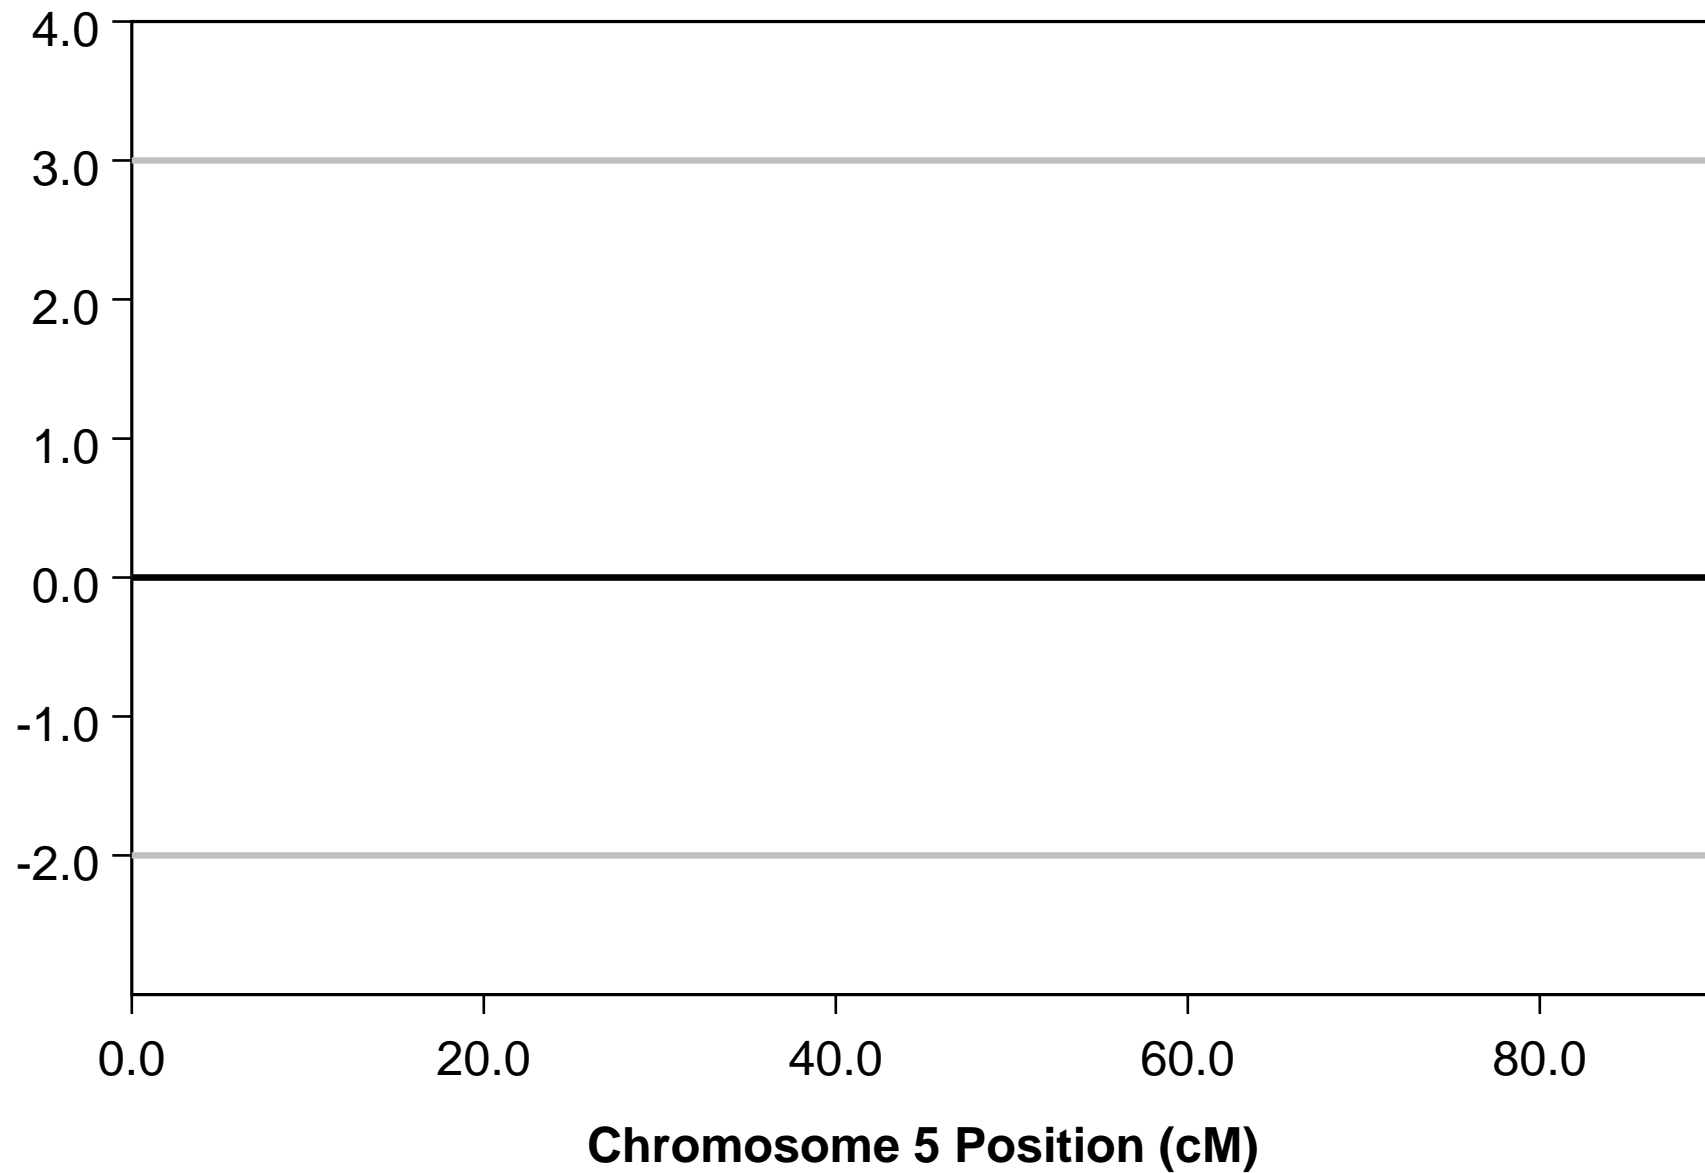

# Parametric Analysis for recessive

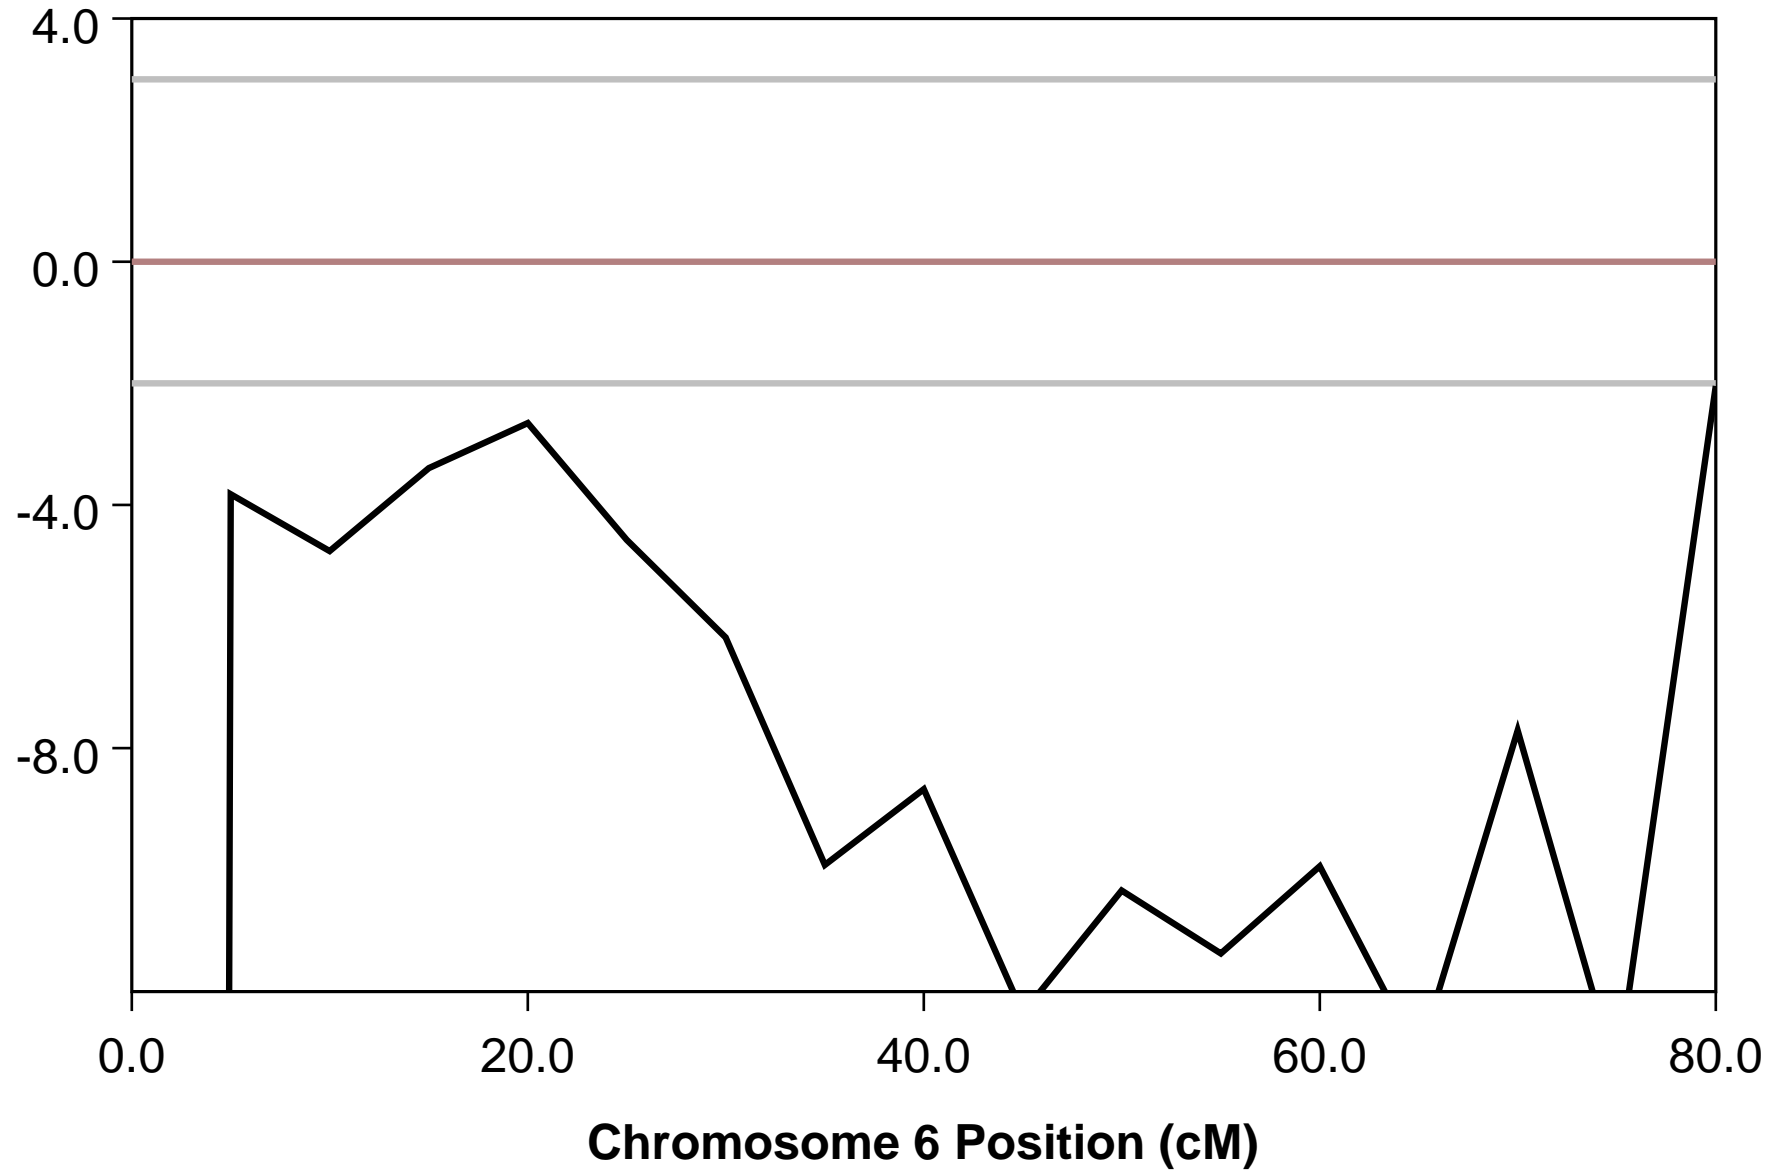

# Parametric Analysis for recessive

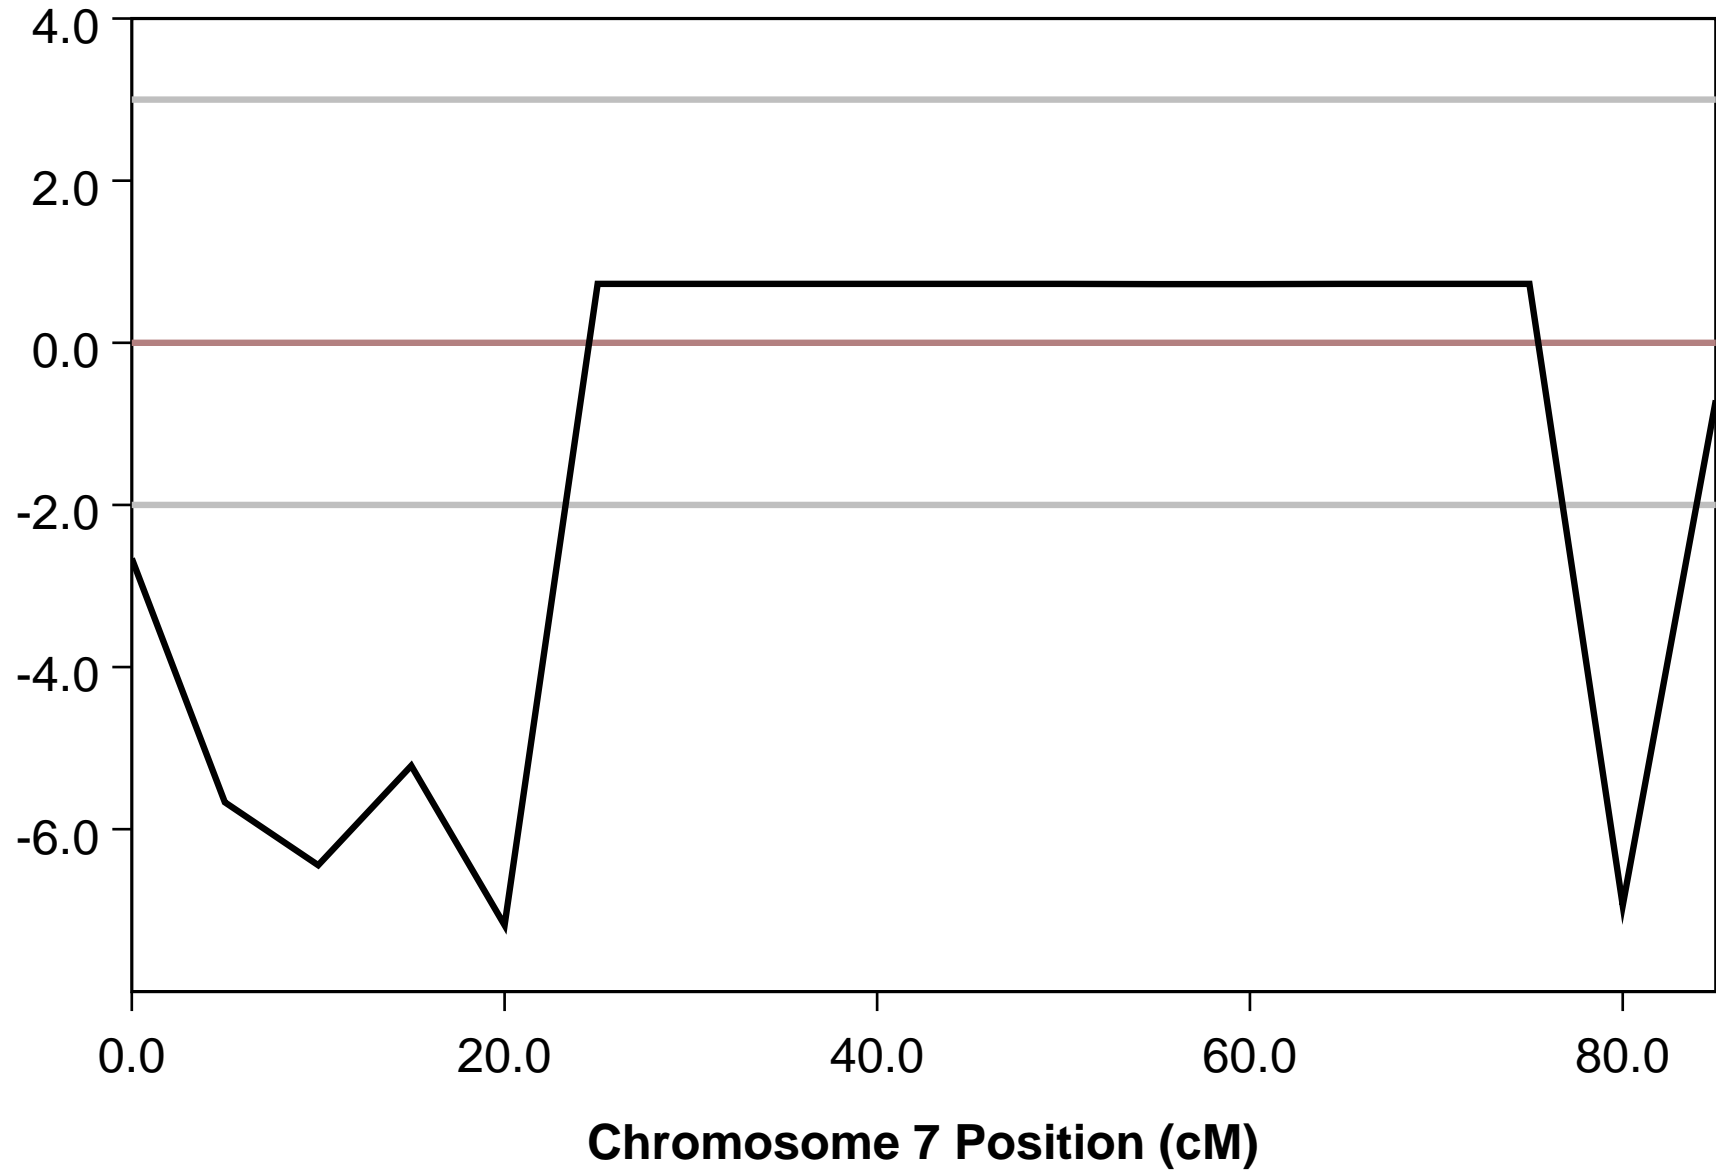

# Parametric Analysis for recessive

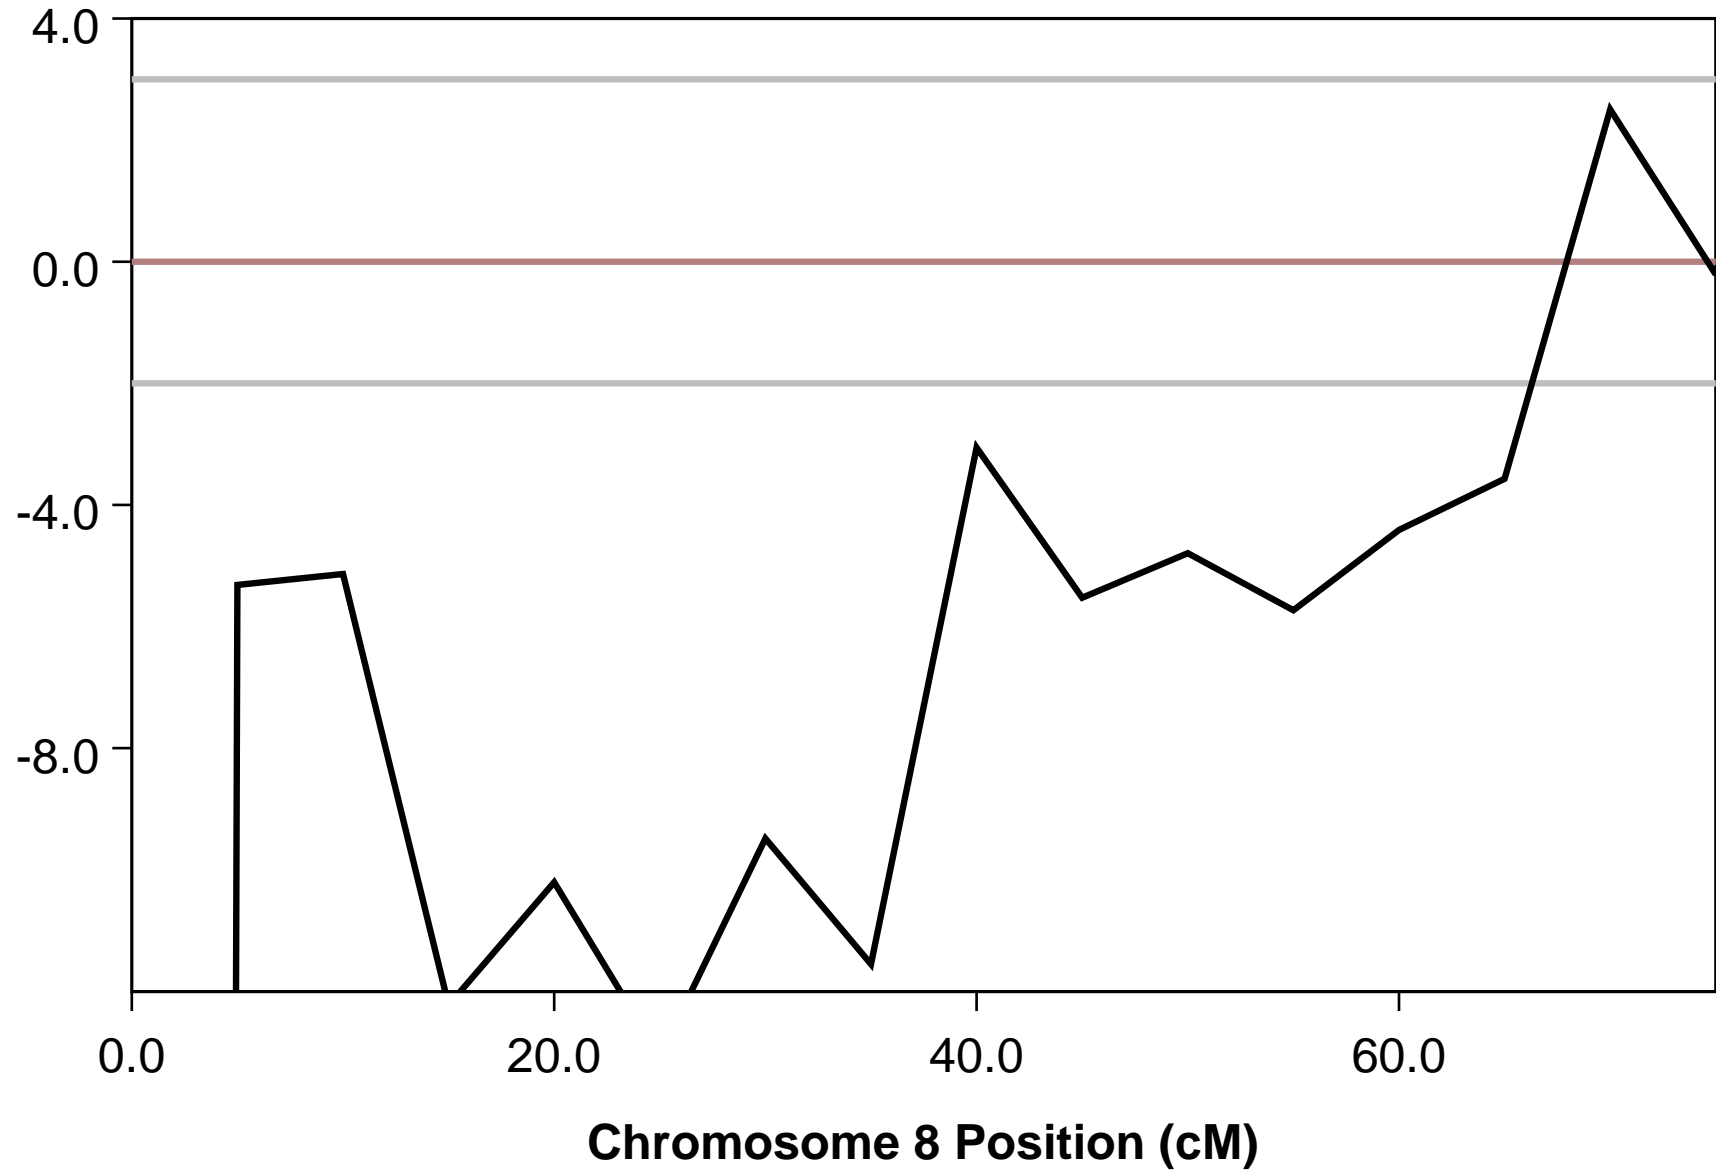



# Parametric Analysis for recessive

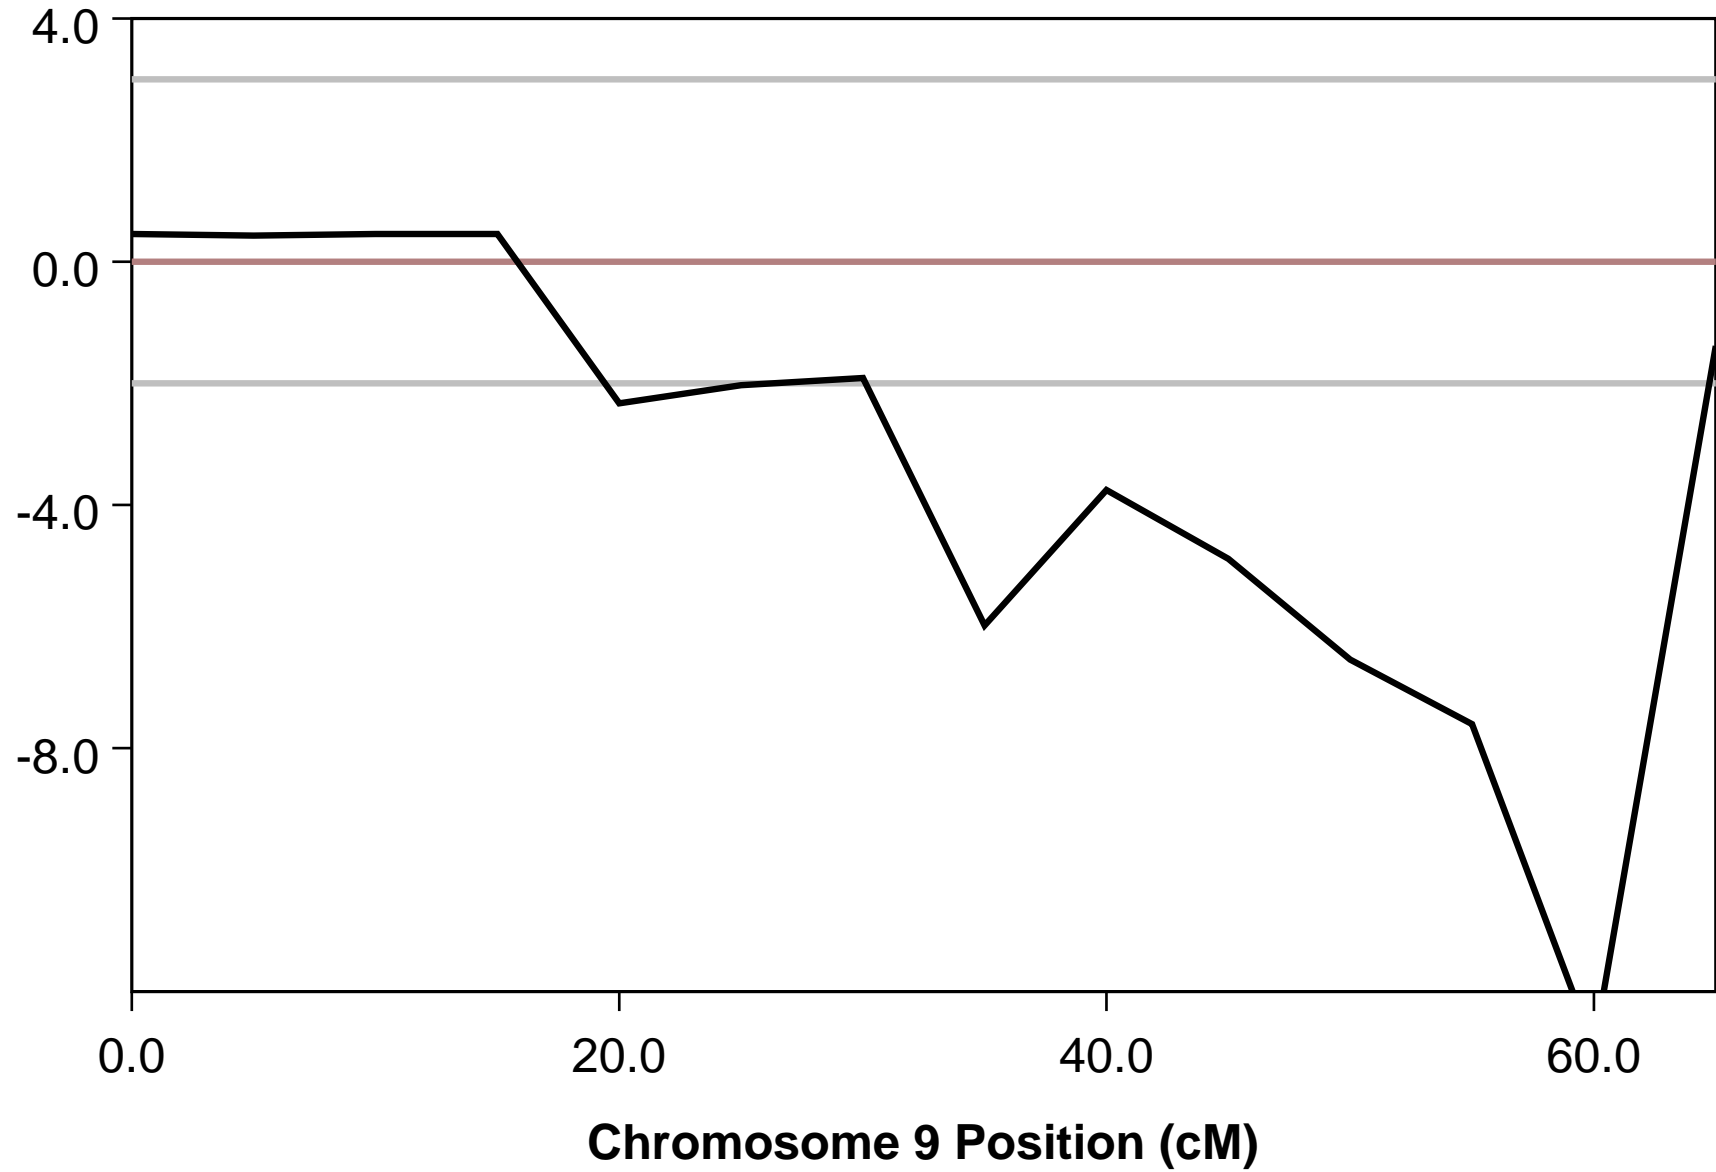

# Parametric Analysis for recessive

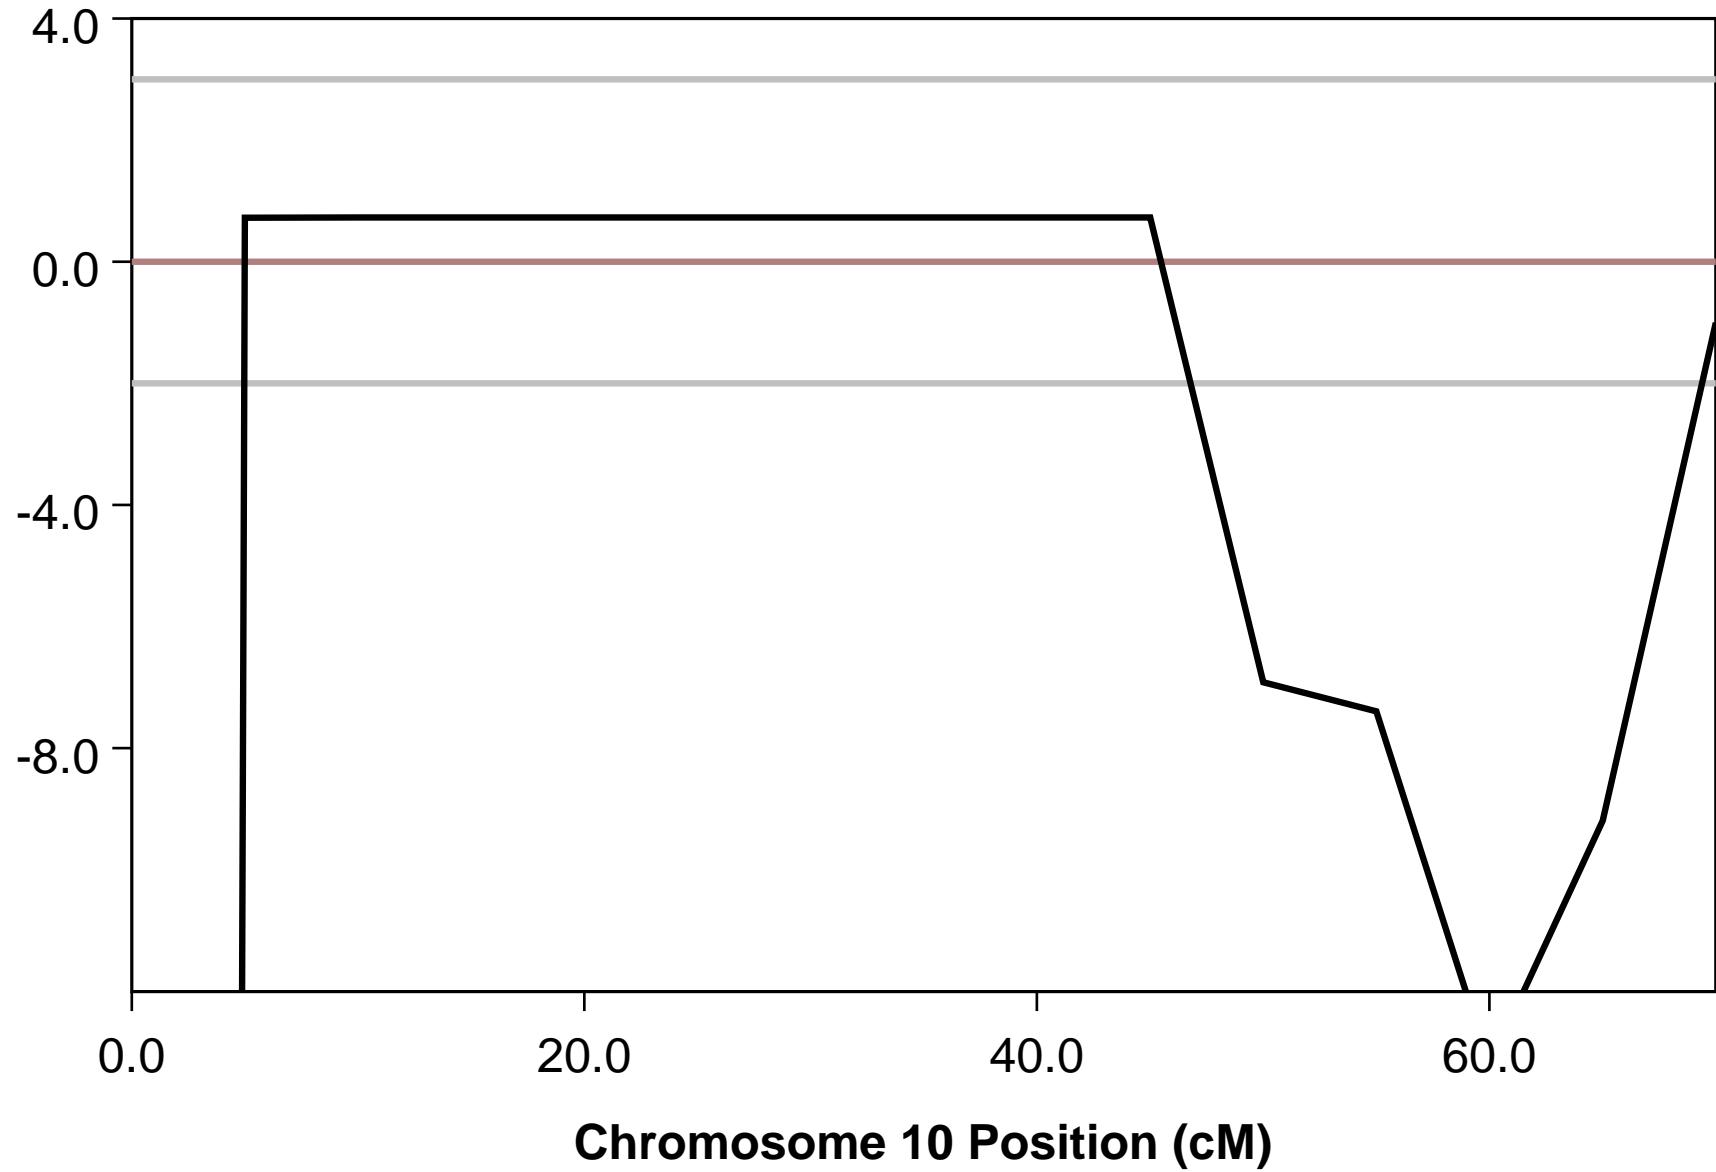

# Parametric Analysis for recessive

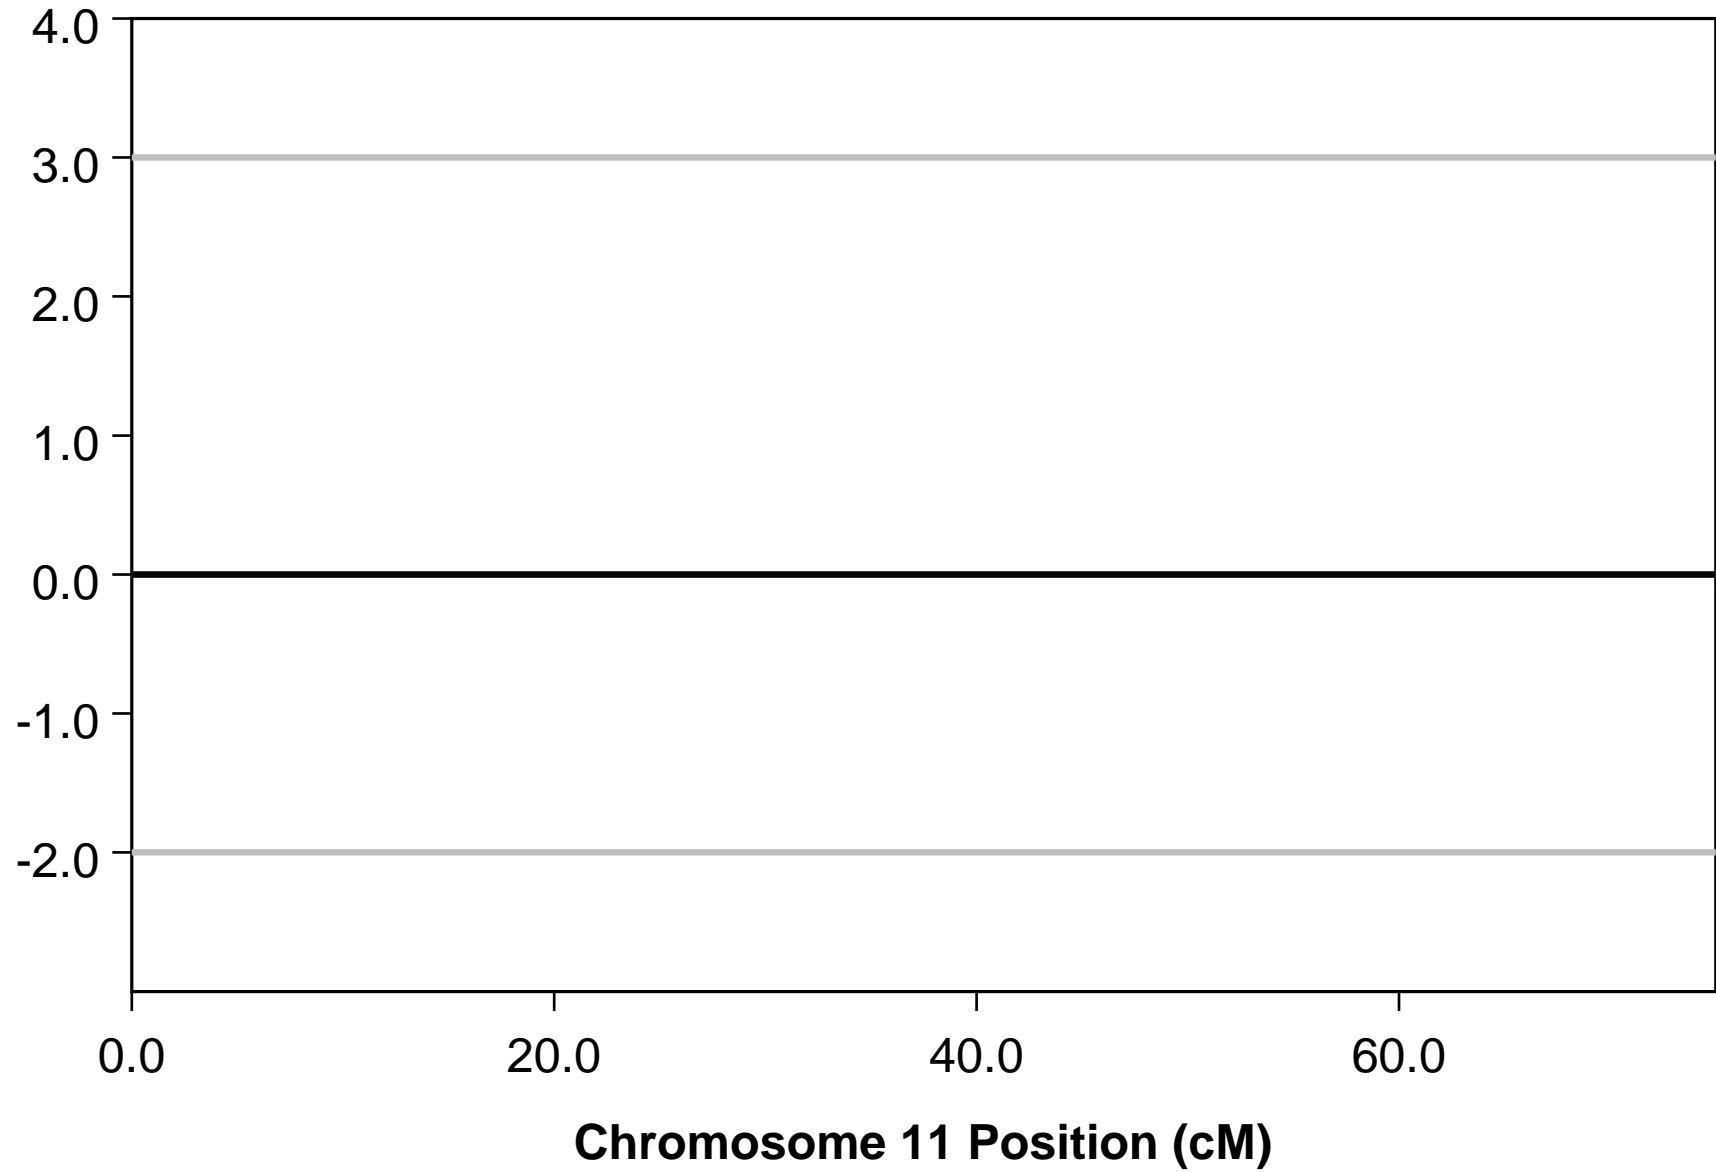

# Parametric Analysis for recessive

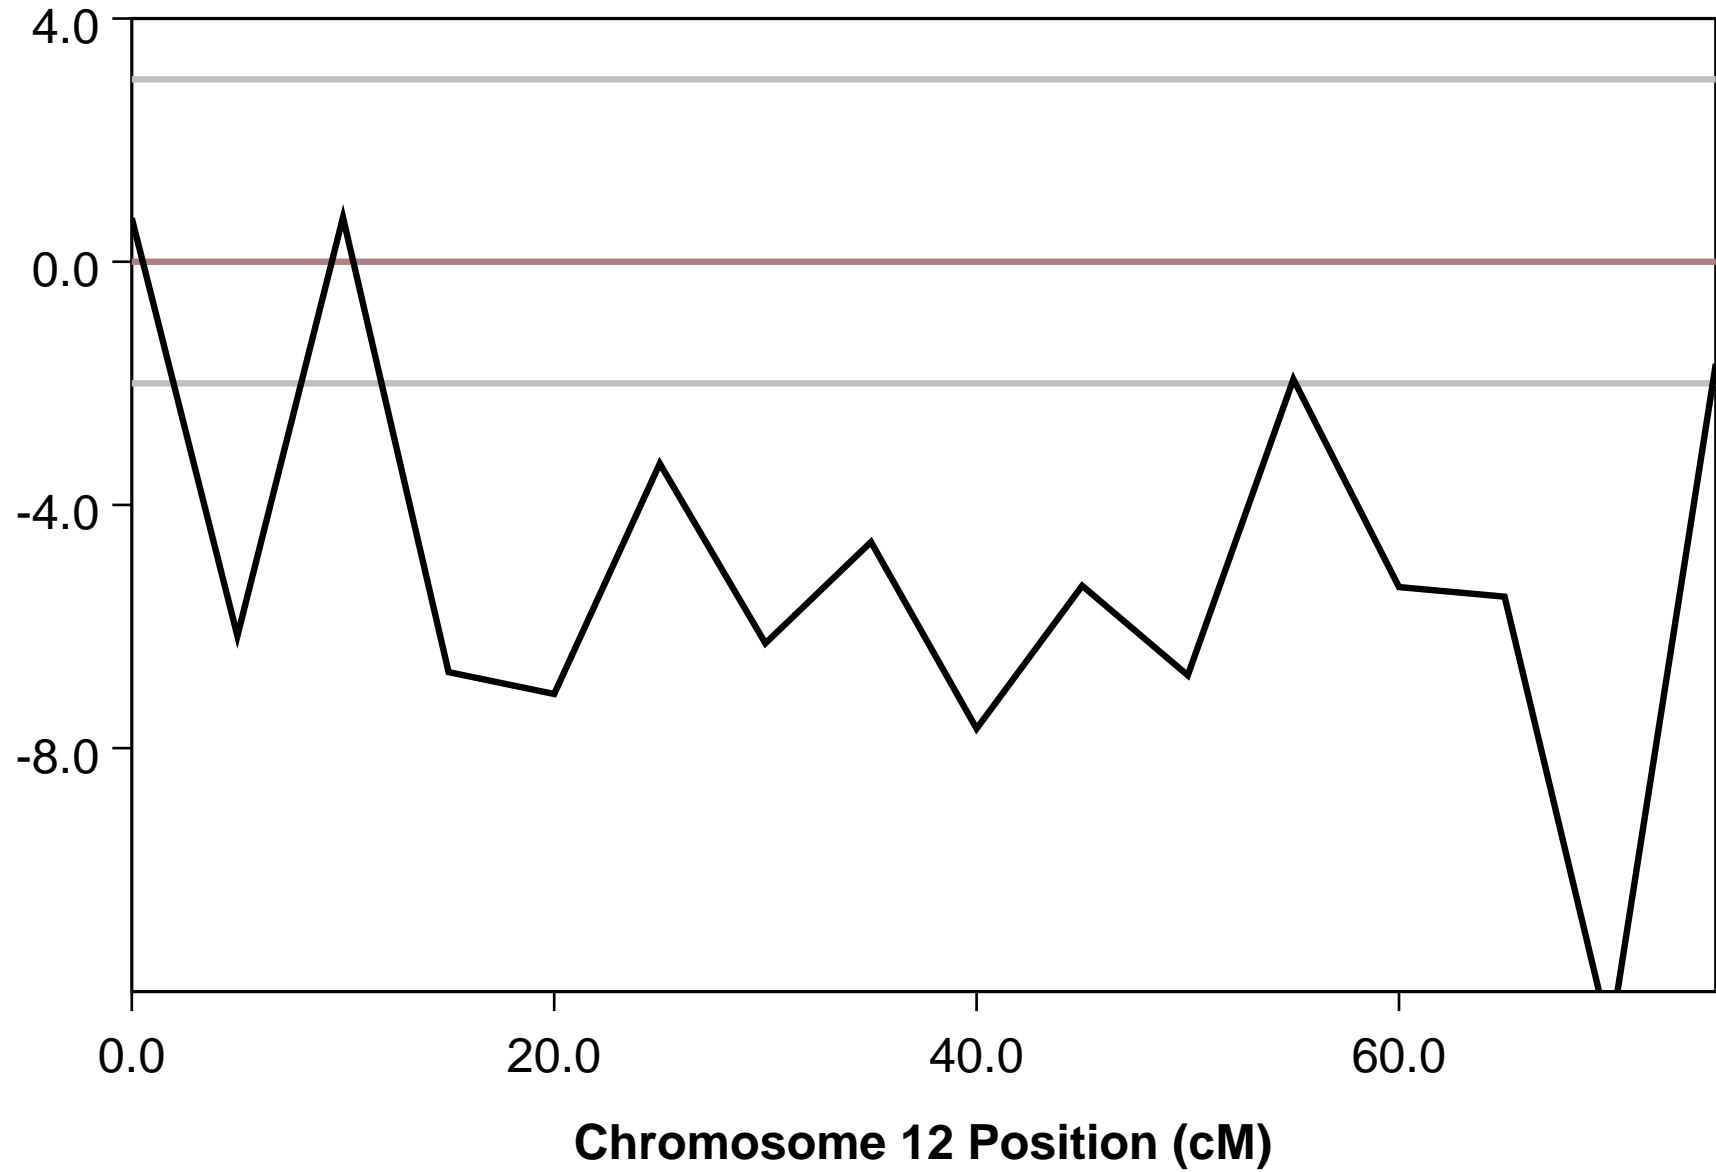

# Parametric Analysis for recessive

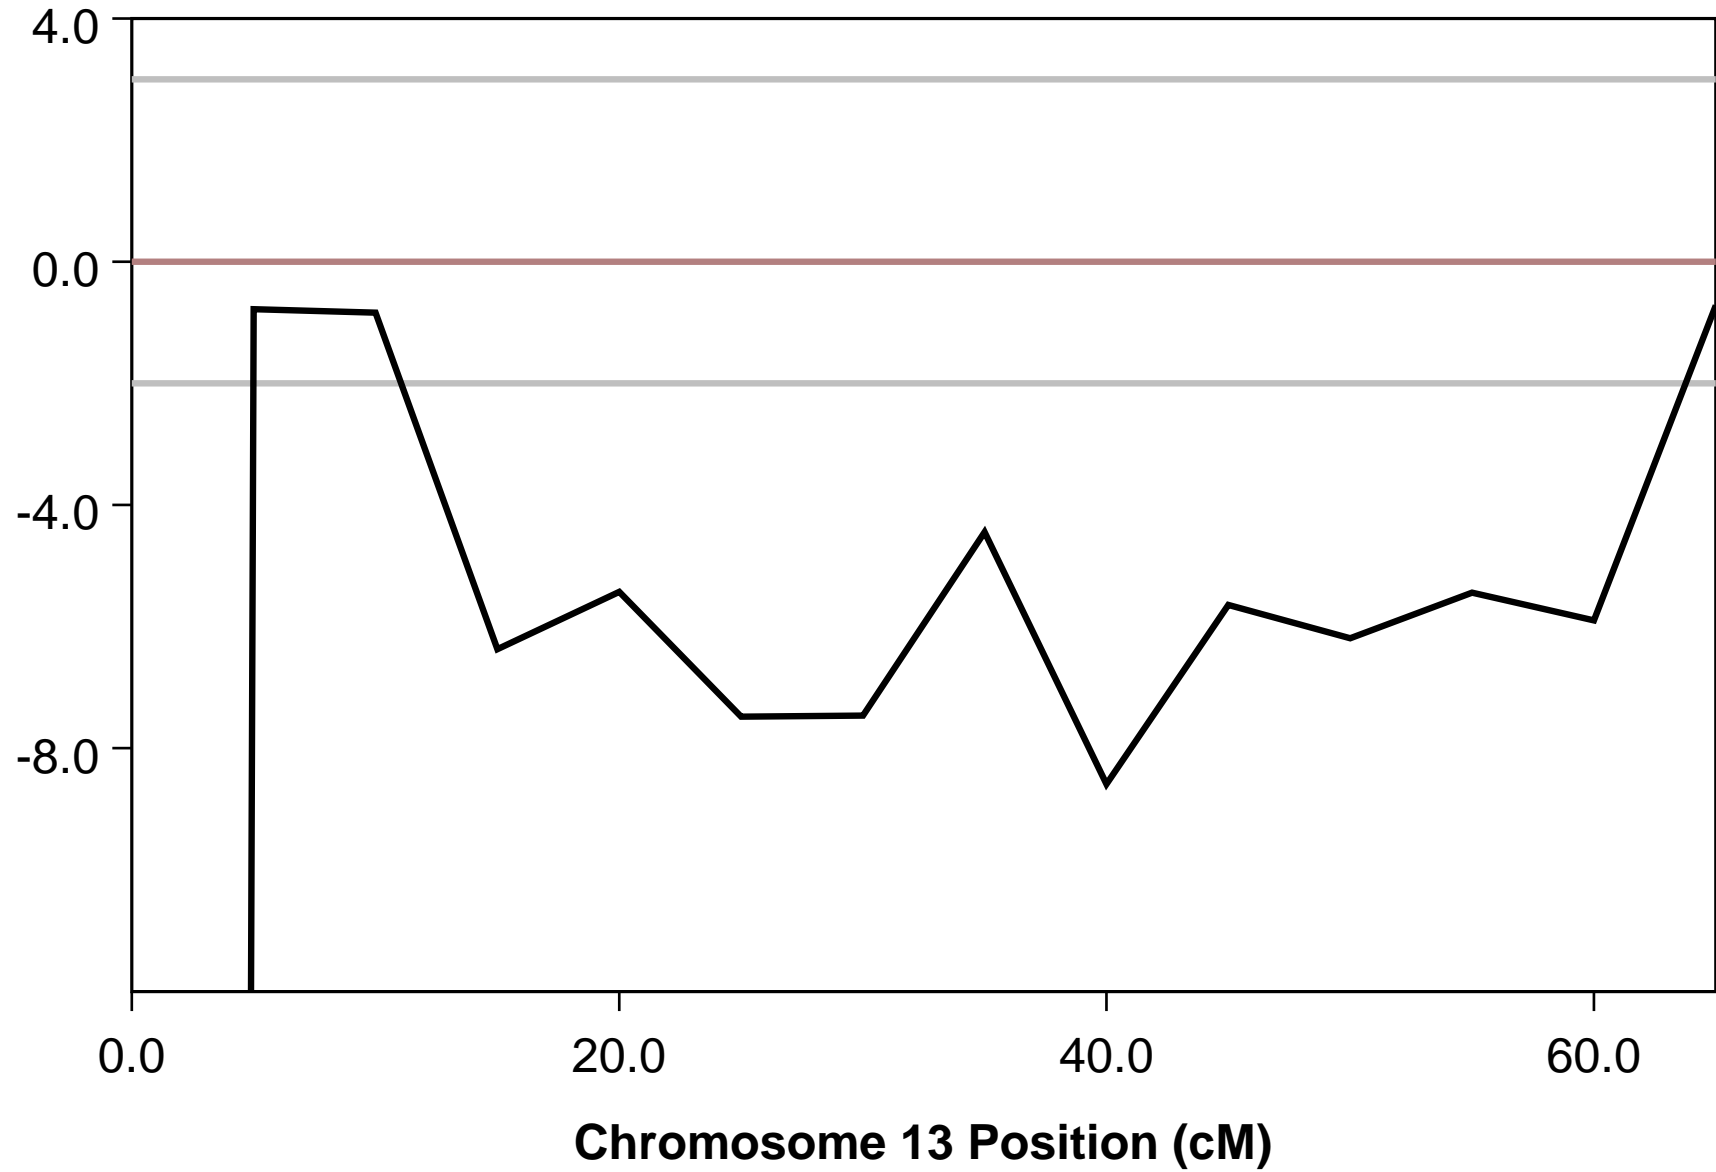

# Parametric Analysis for recessive

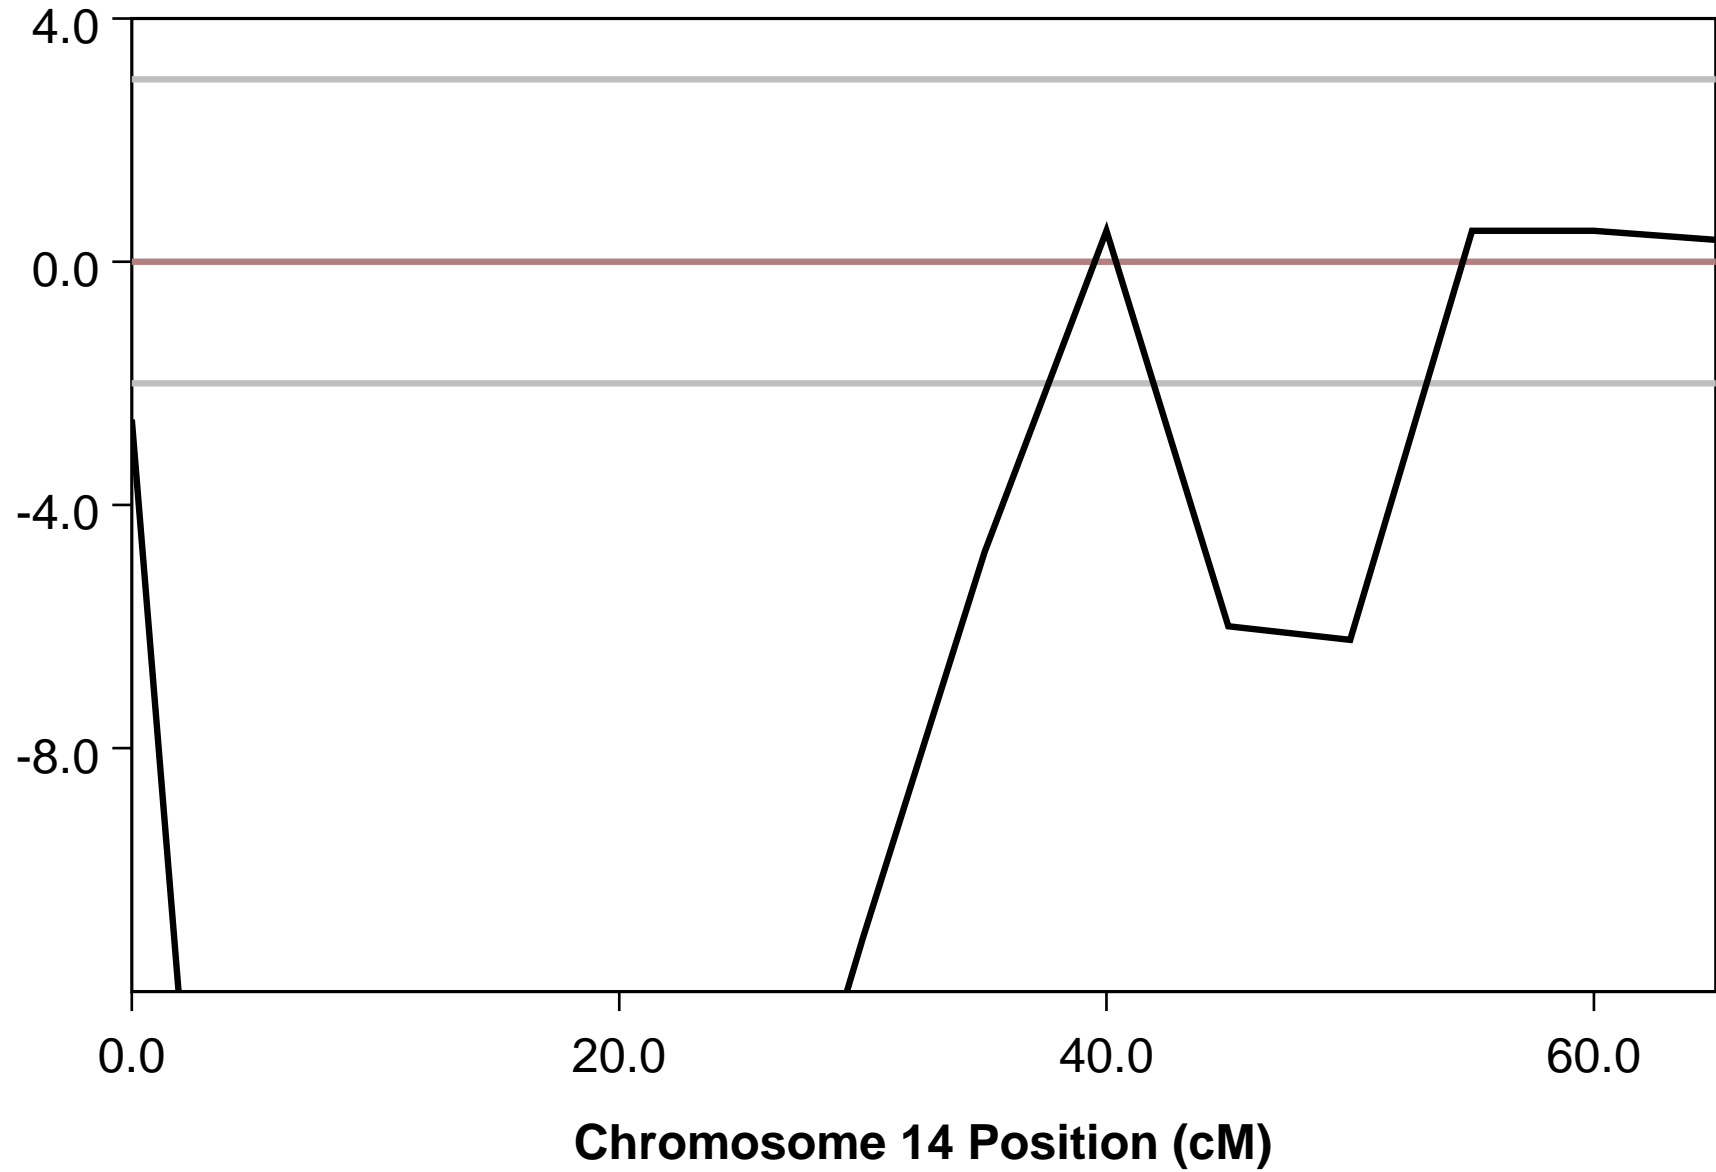

# Parametric Analysis for recessive

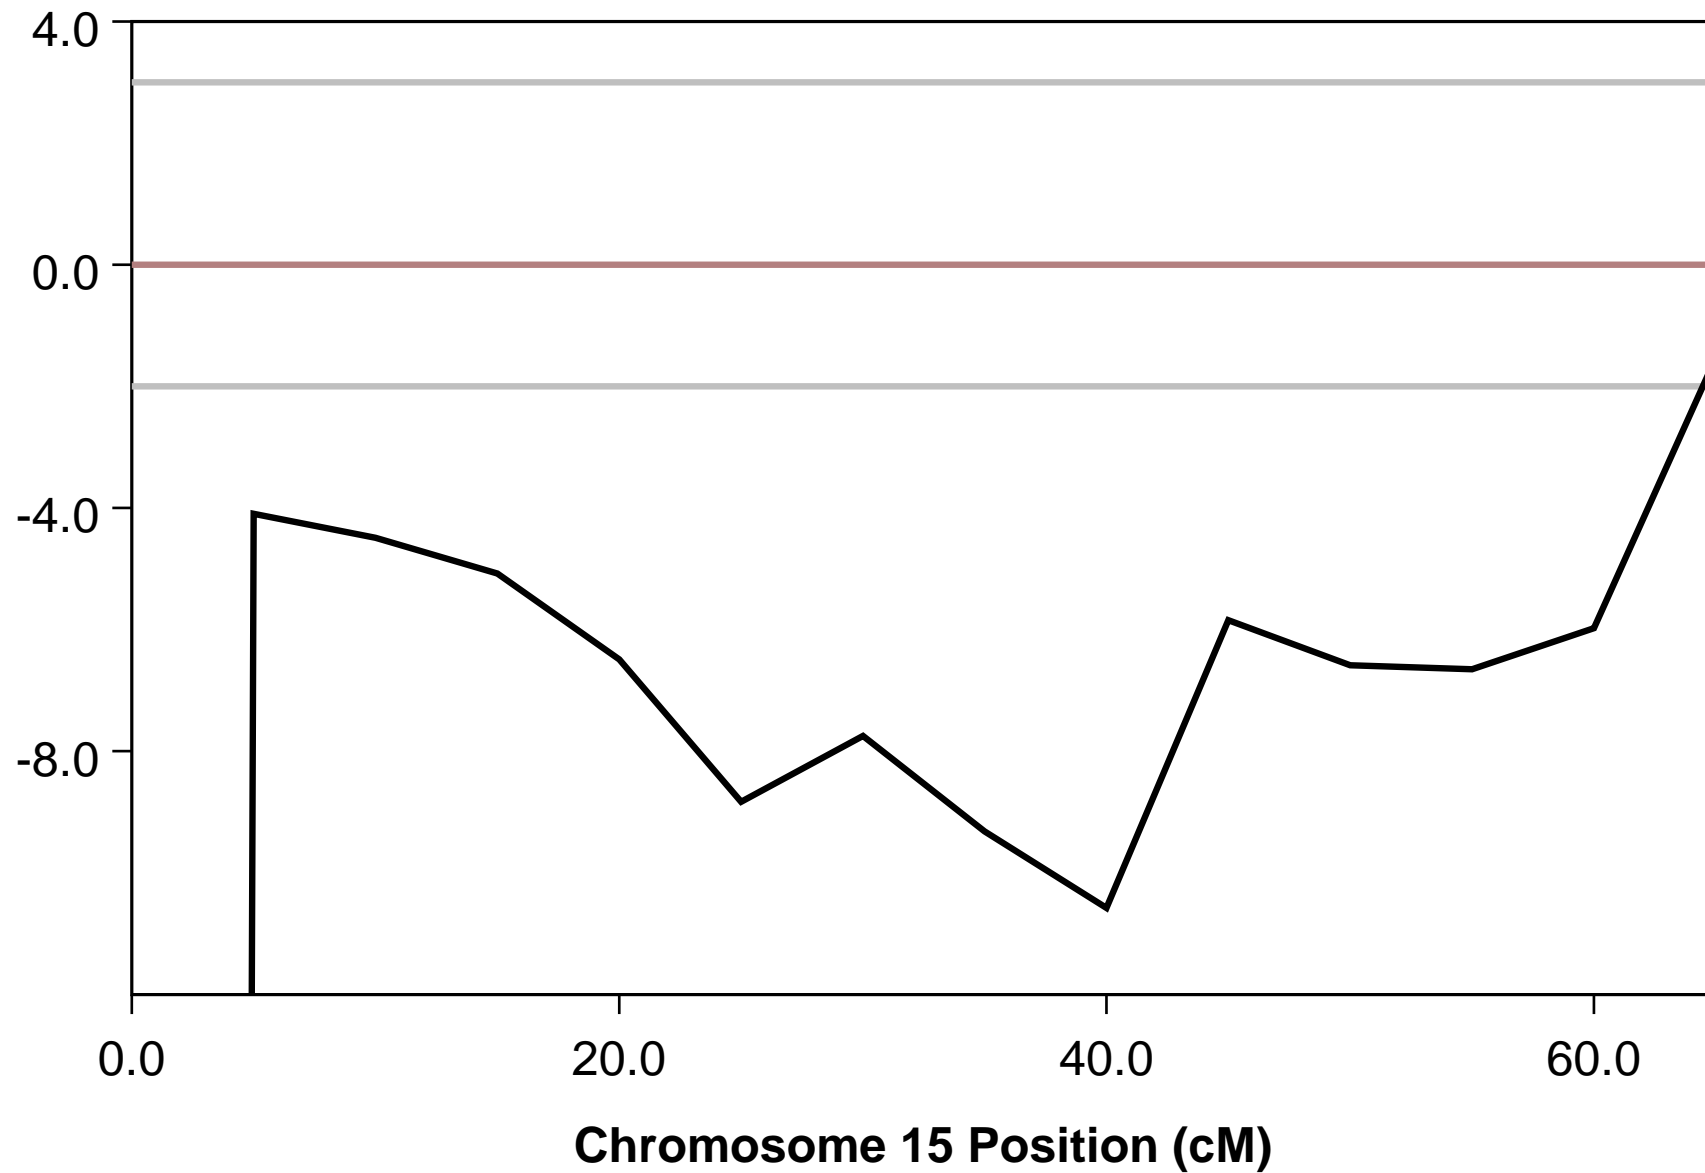

# Parametric Analysis for recessive

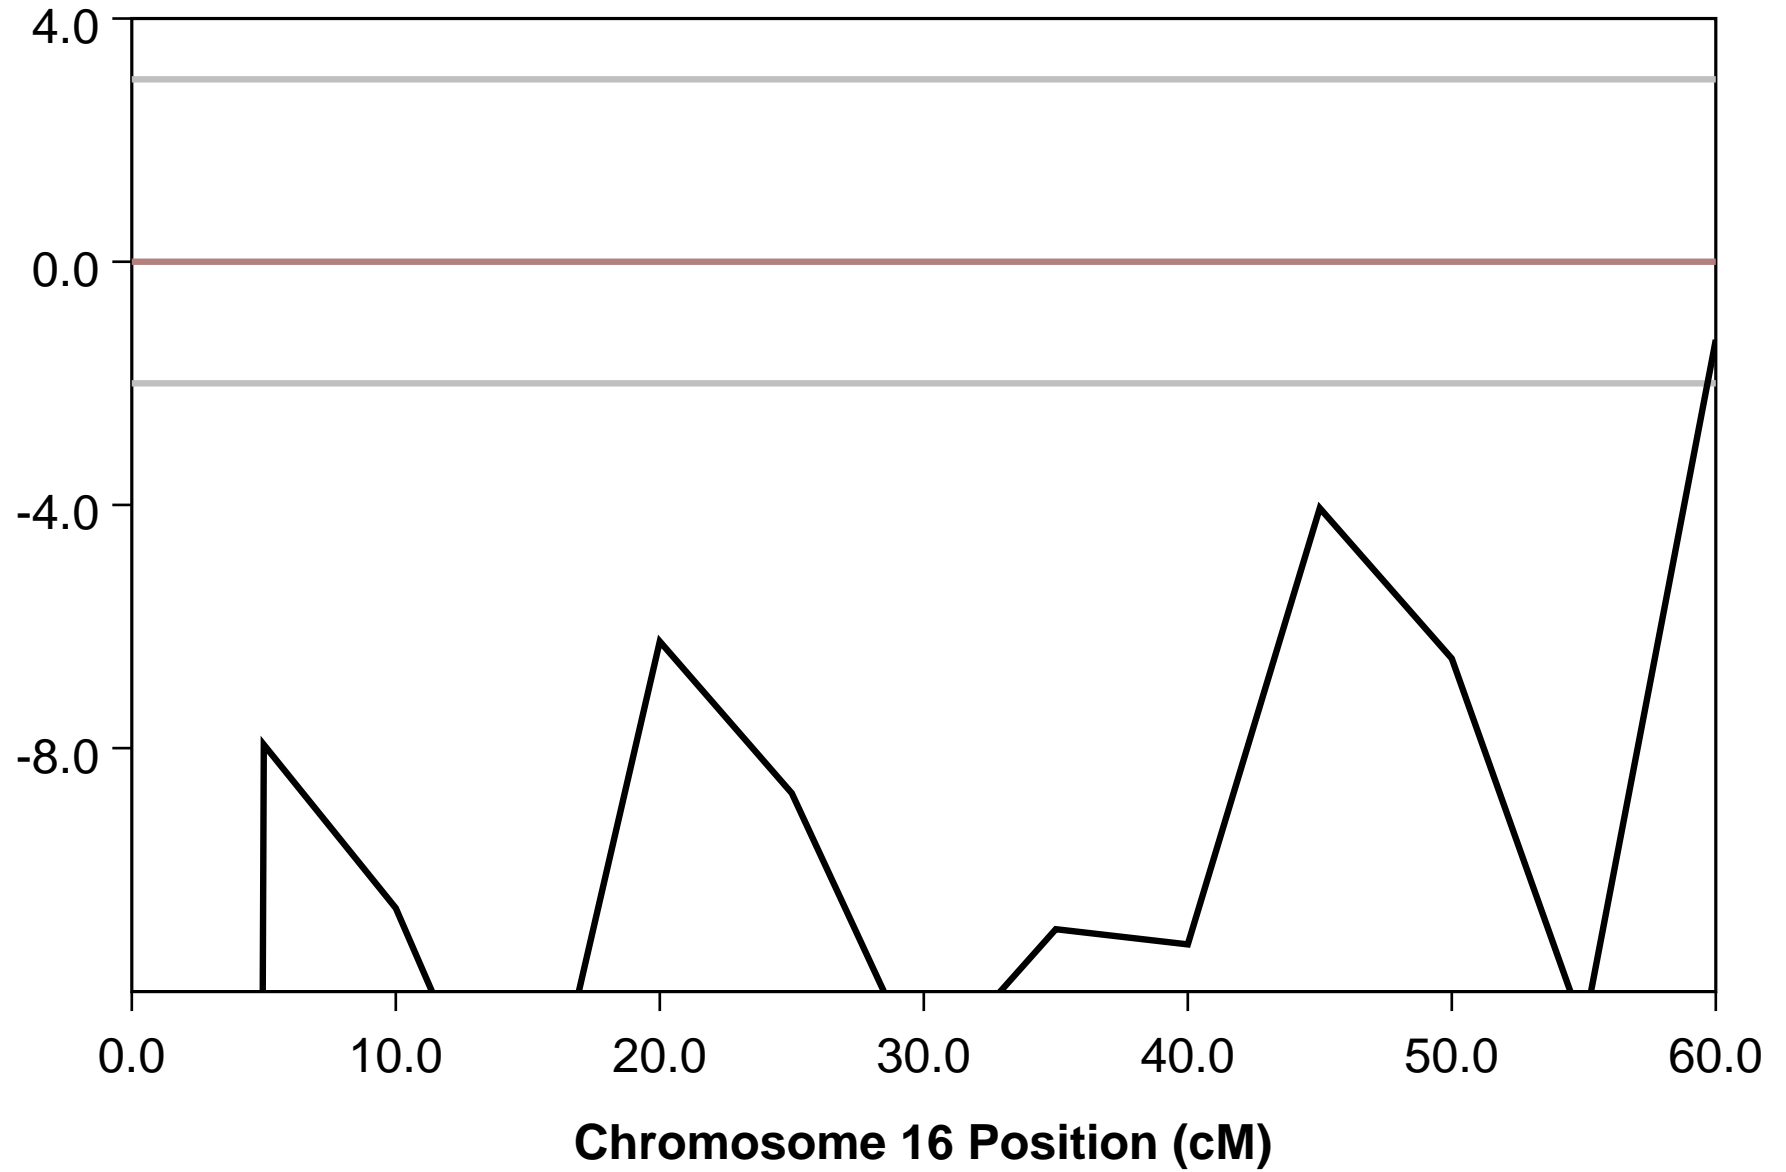



# Parametric Analysis for recessive

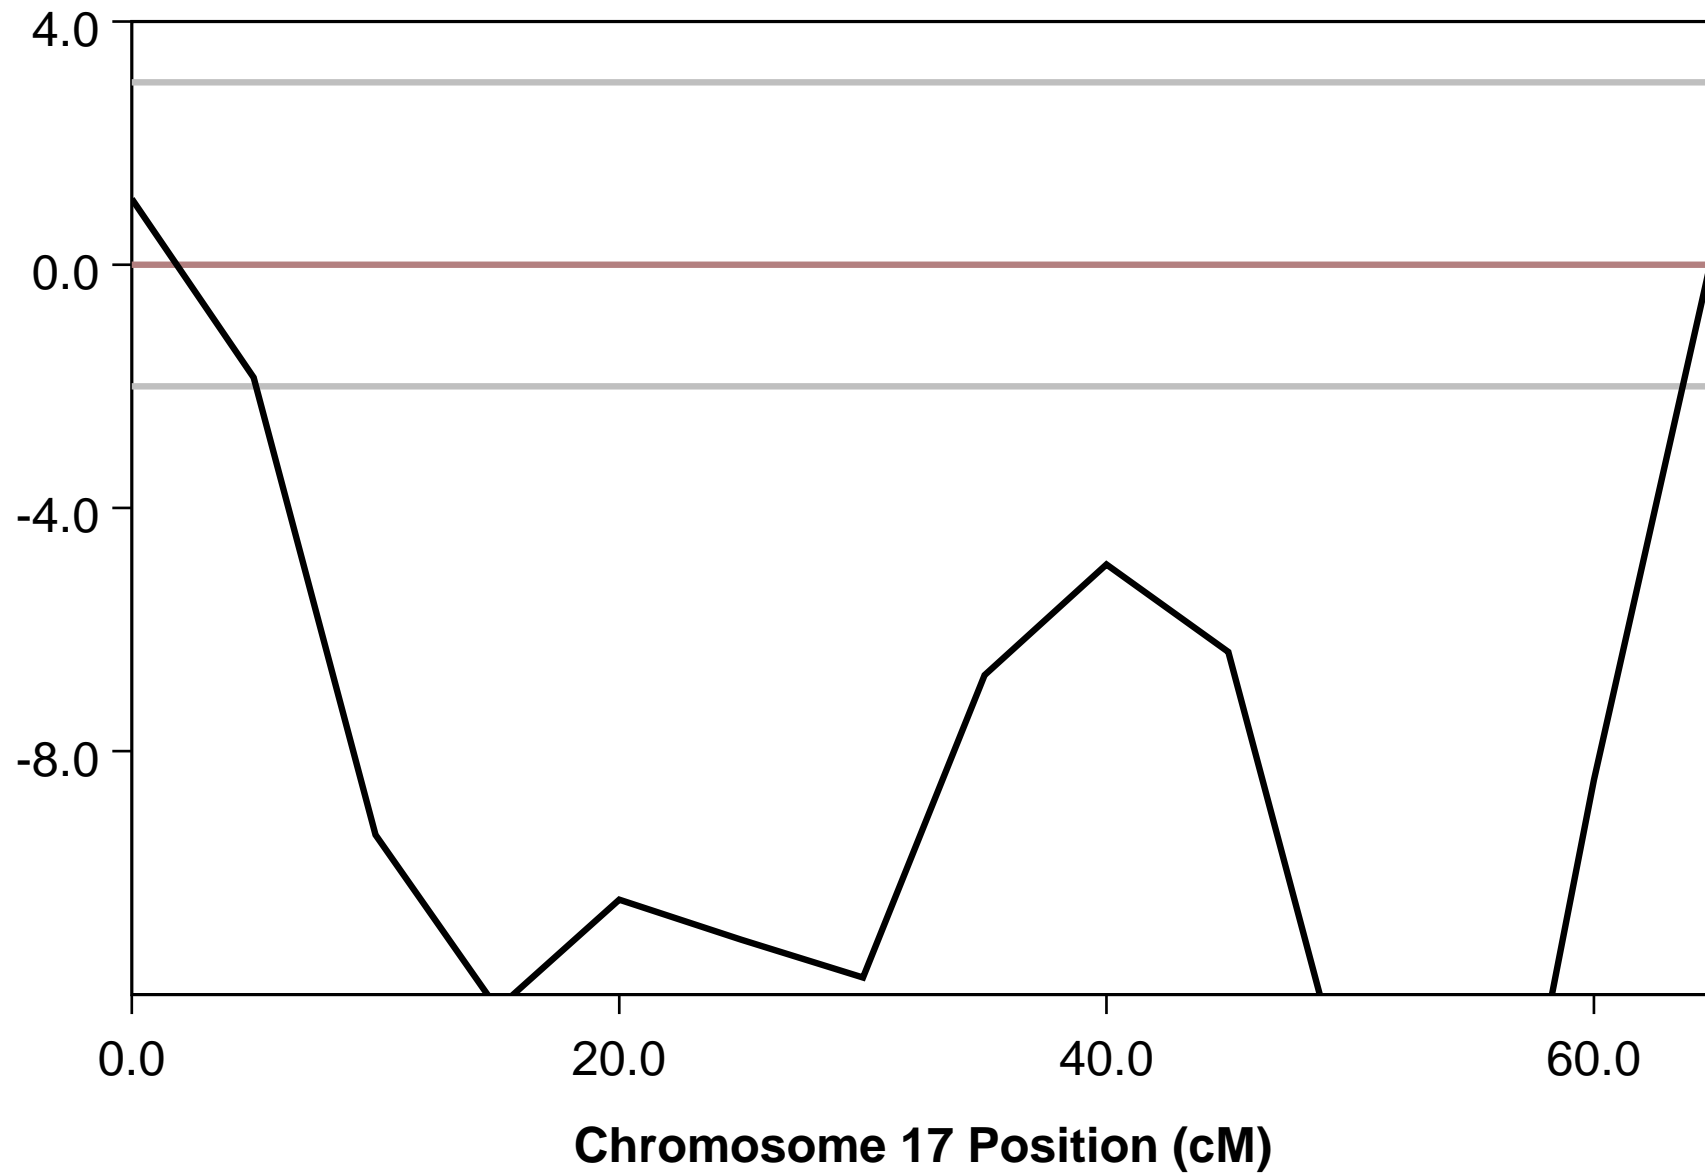

# Parametric Analysis for recessive

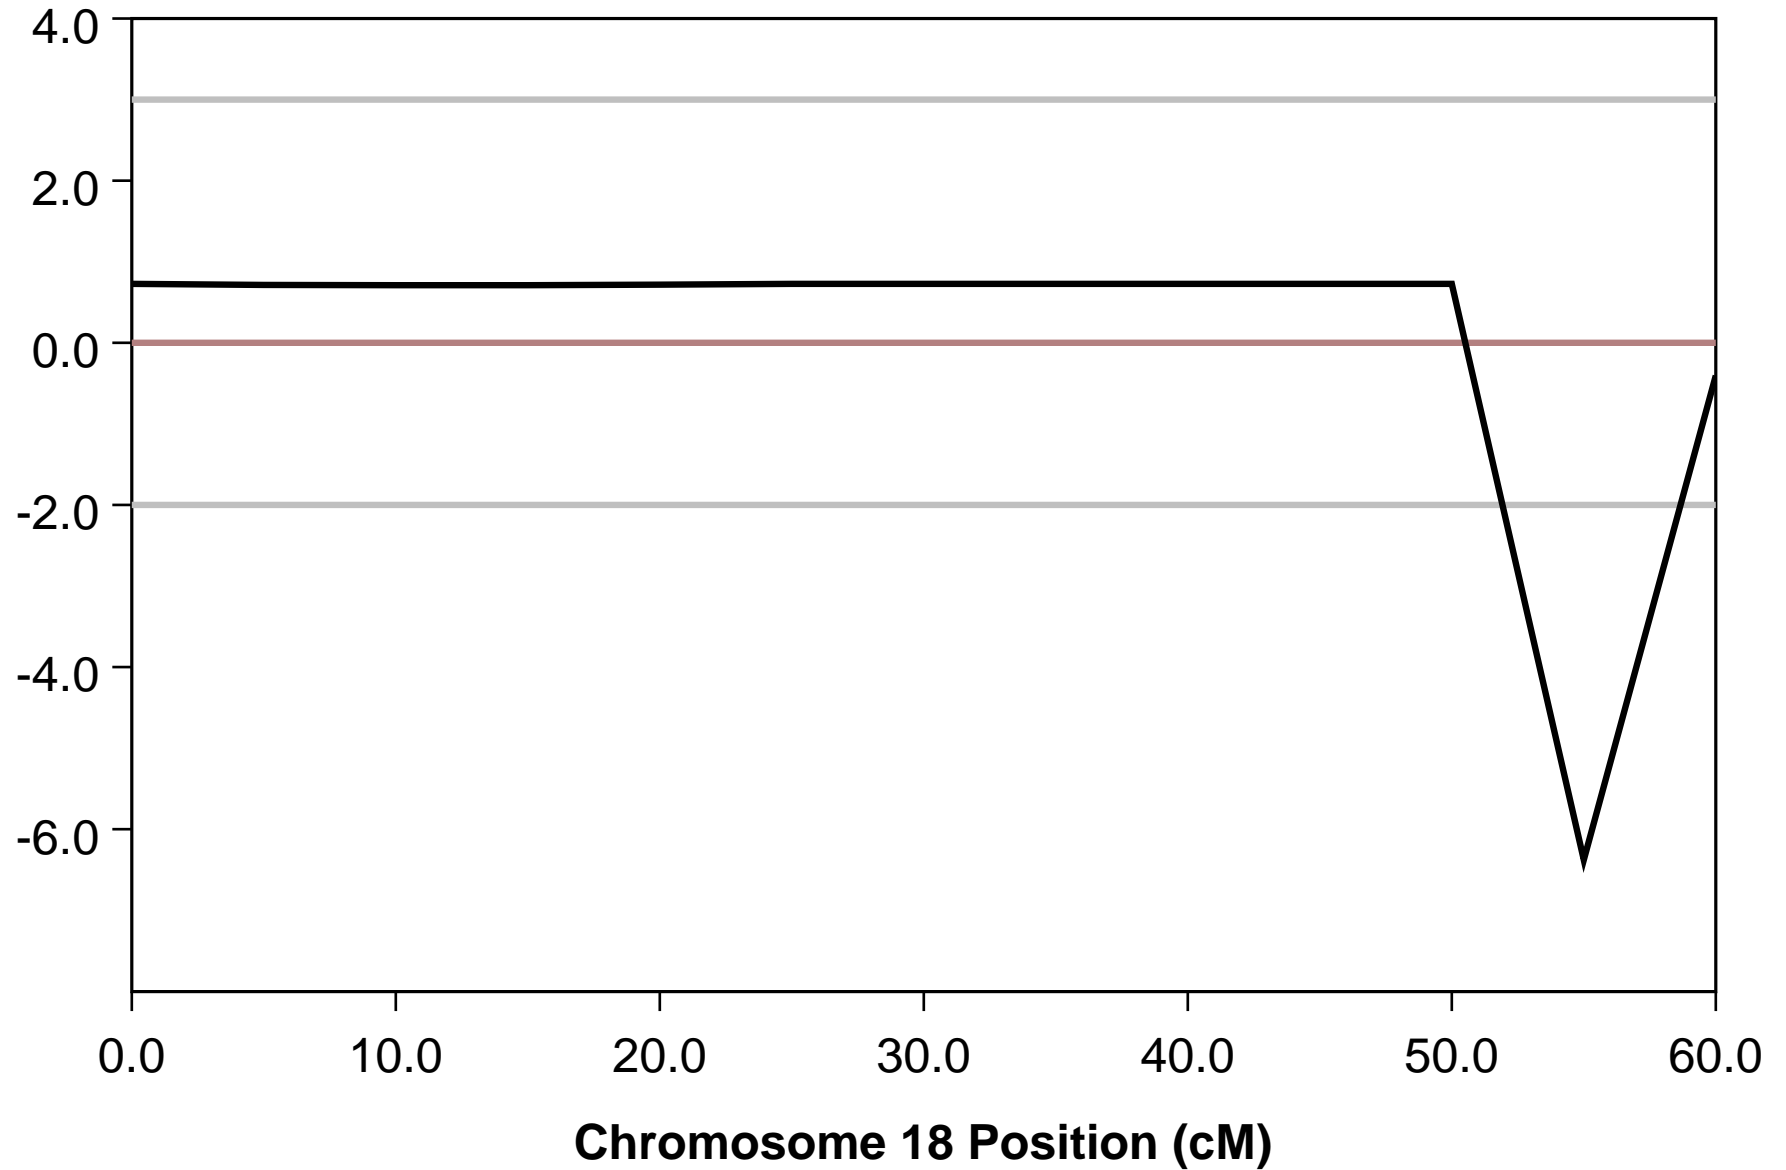

# Parametric Analysis for recessive

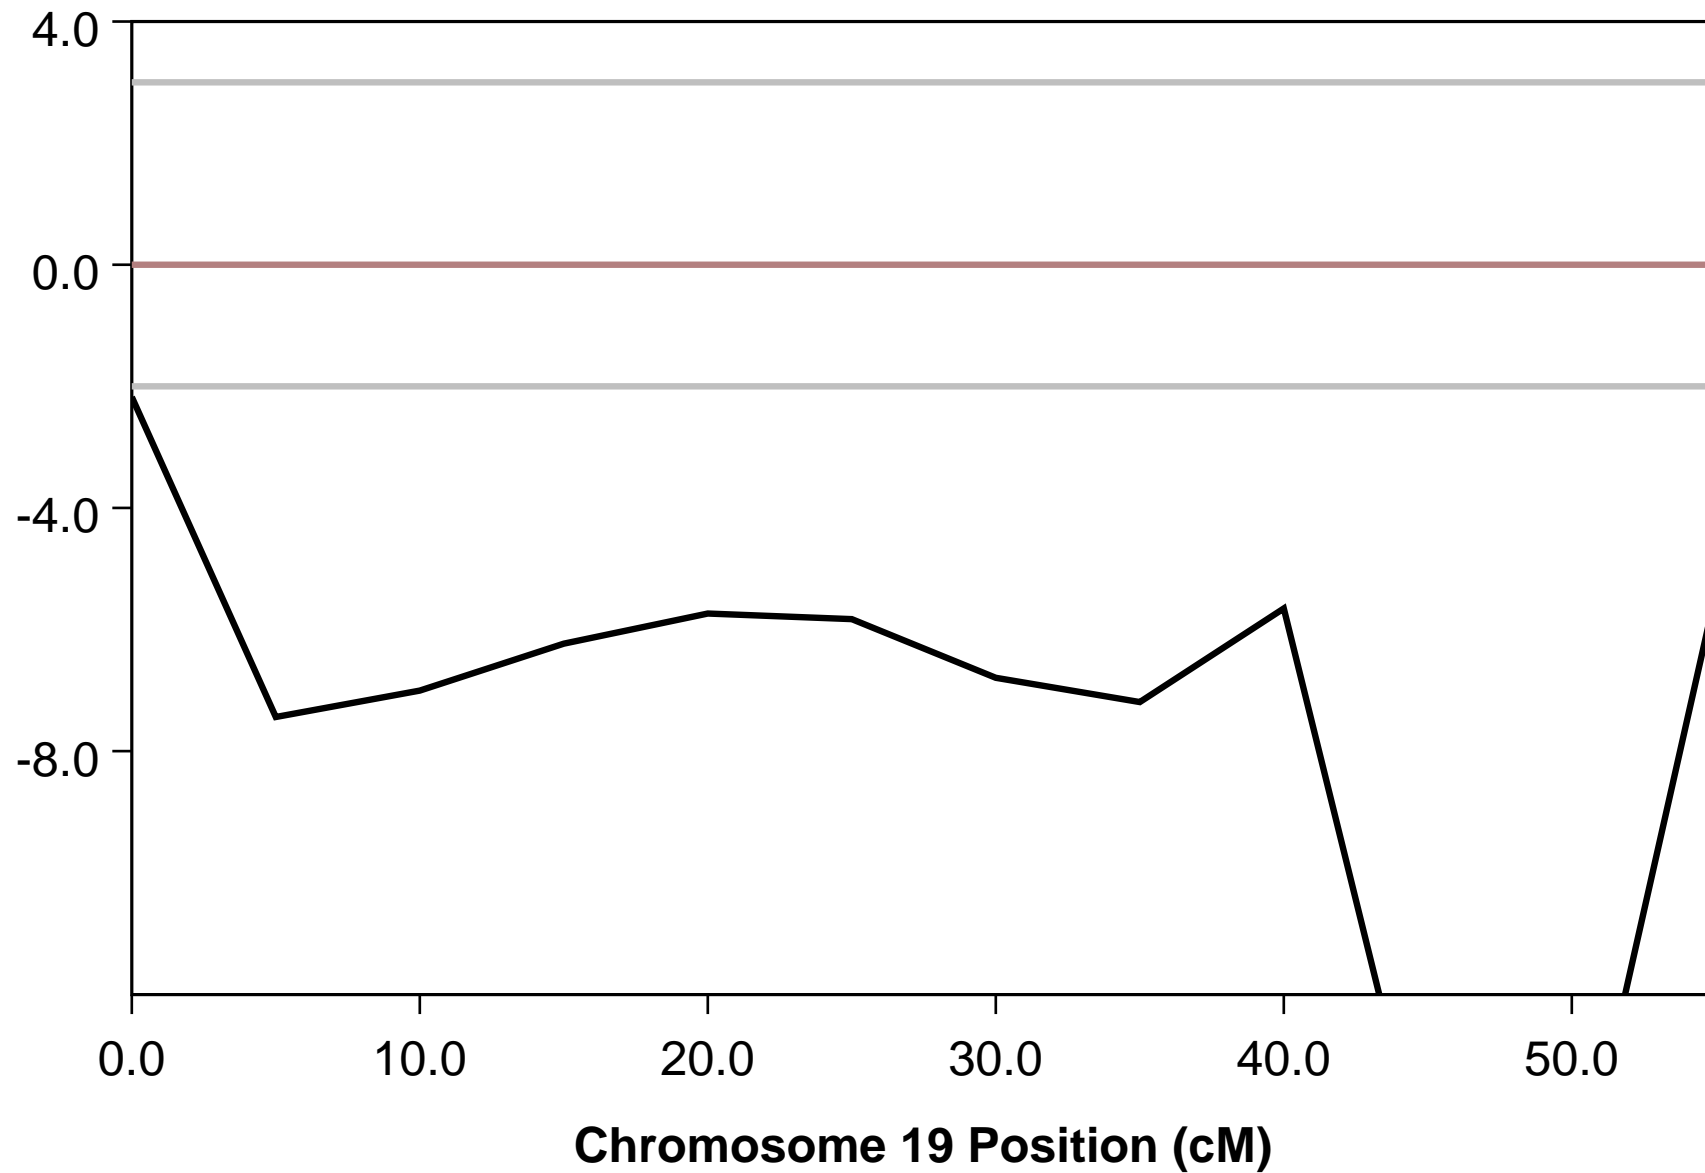

# Parametric Analysis for recessive

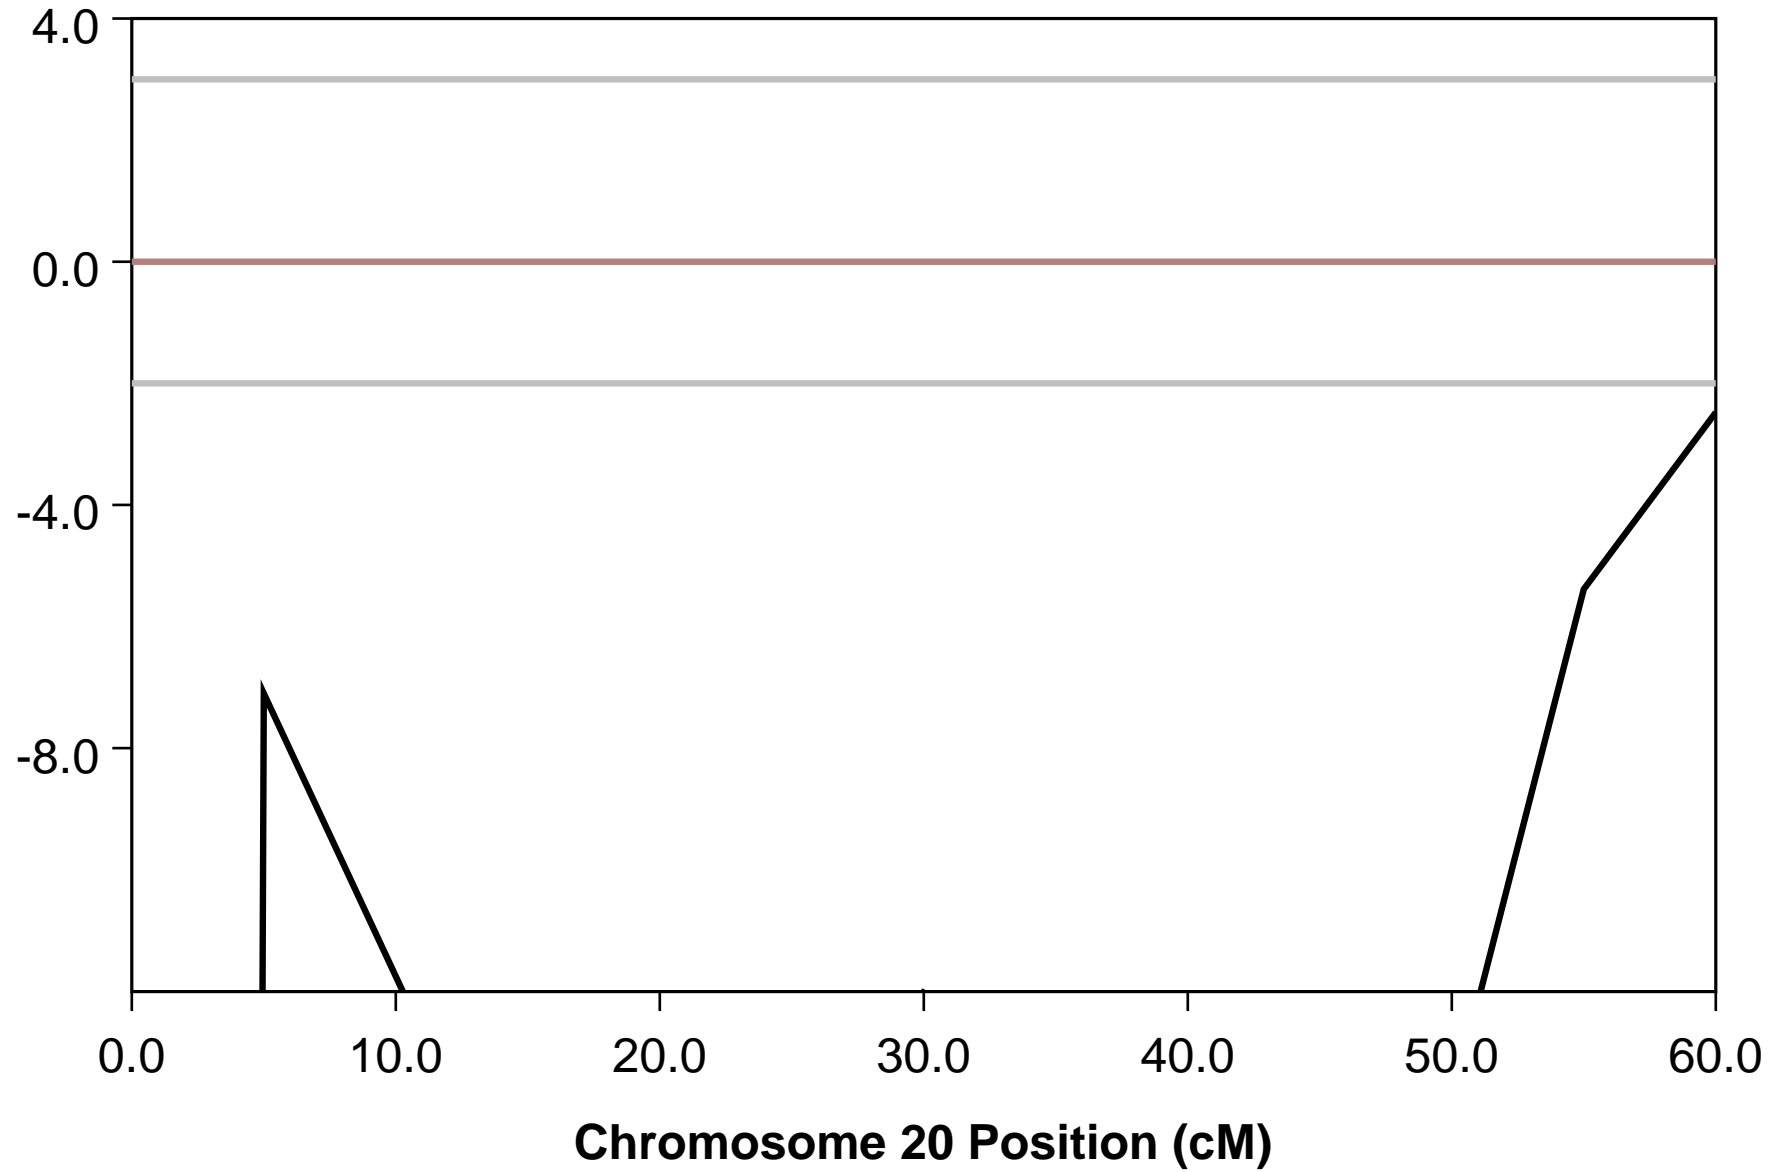

# Parametric Analysis for recessive

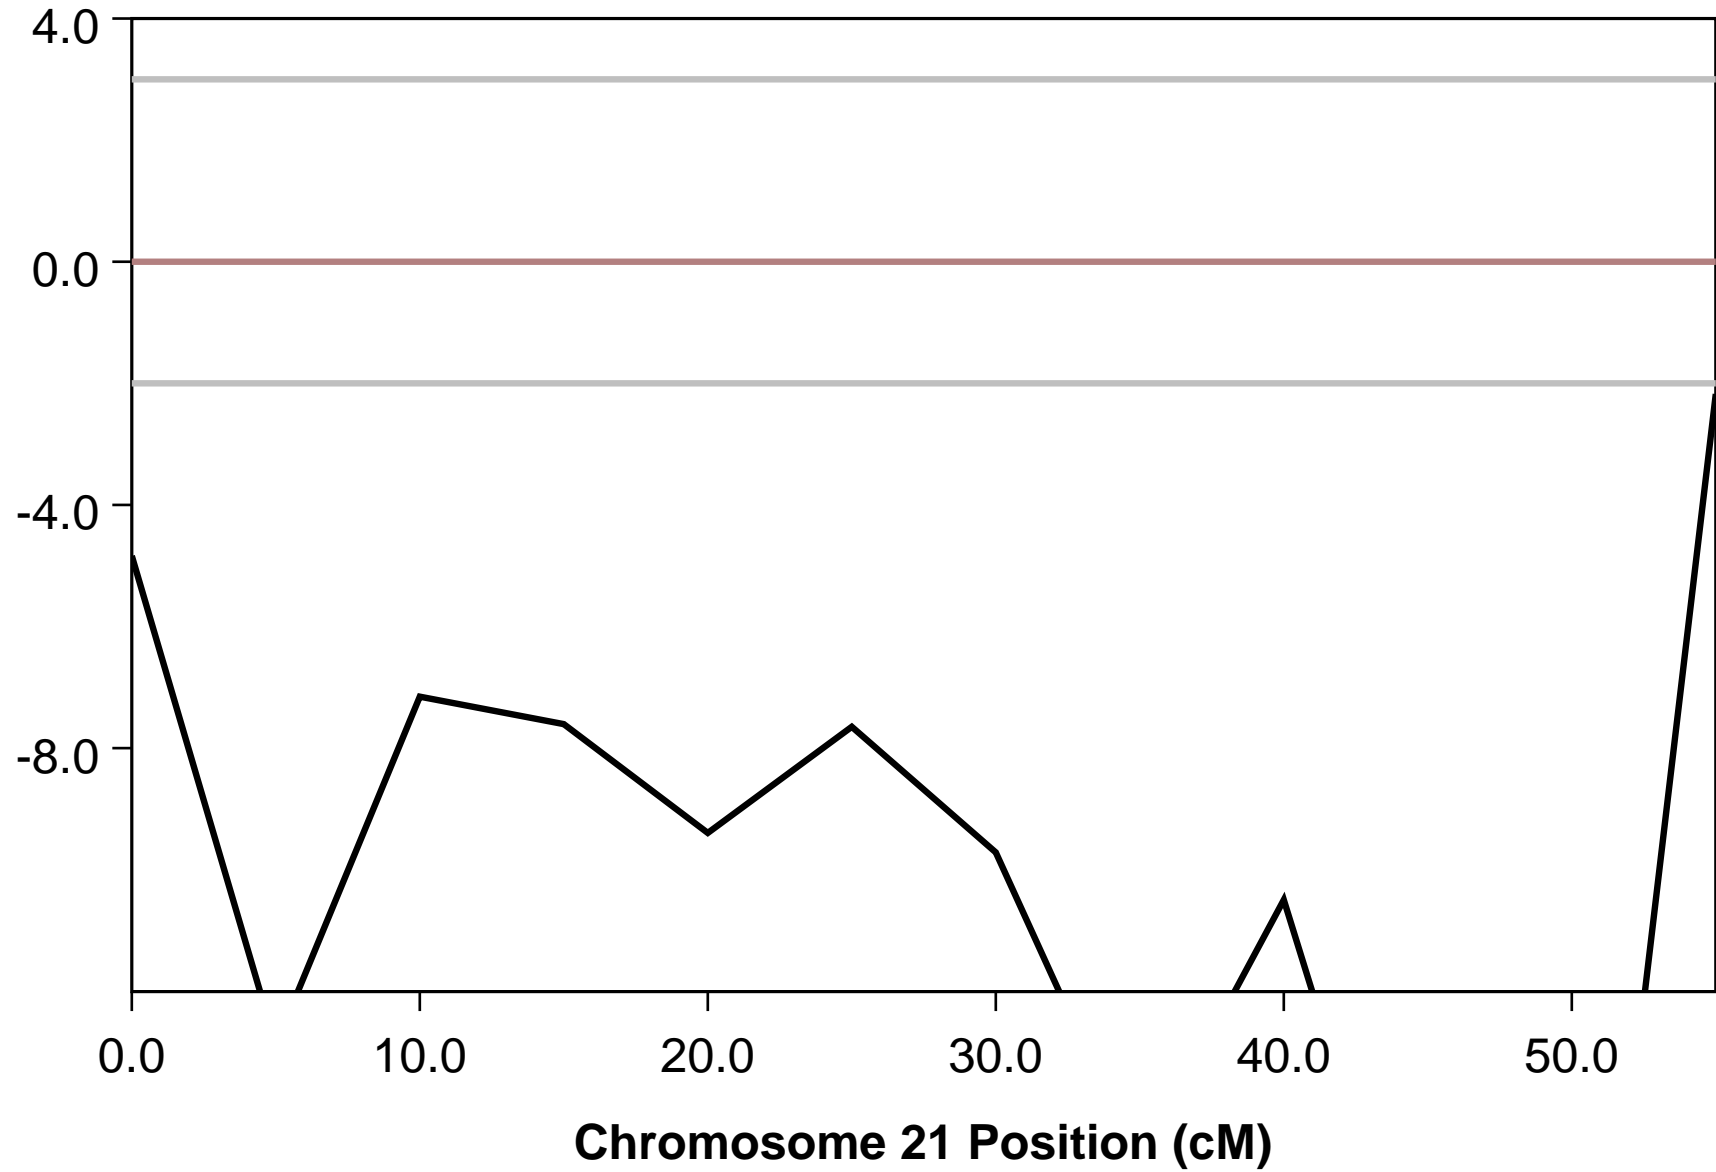

# Parametric Analysis for recessive

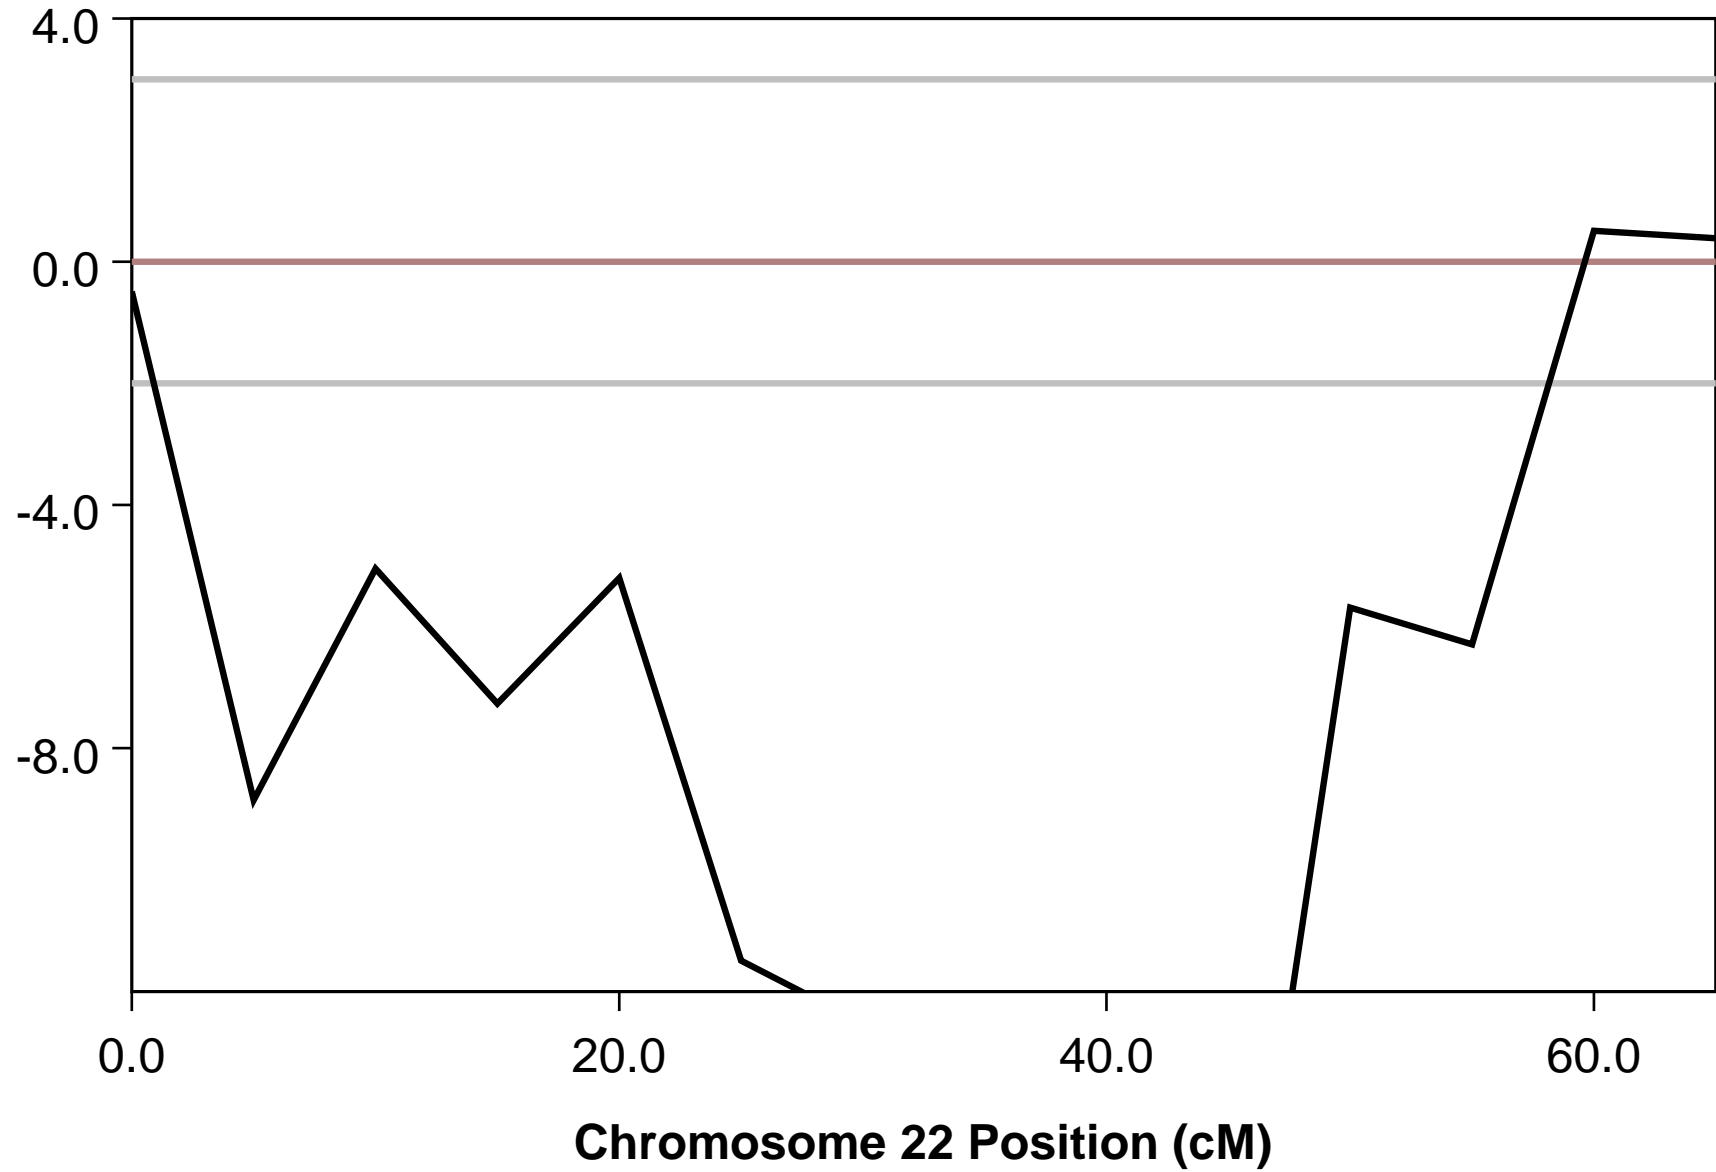

# Parametric Analysis for recessive

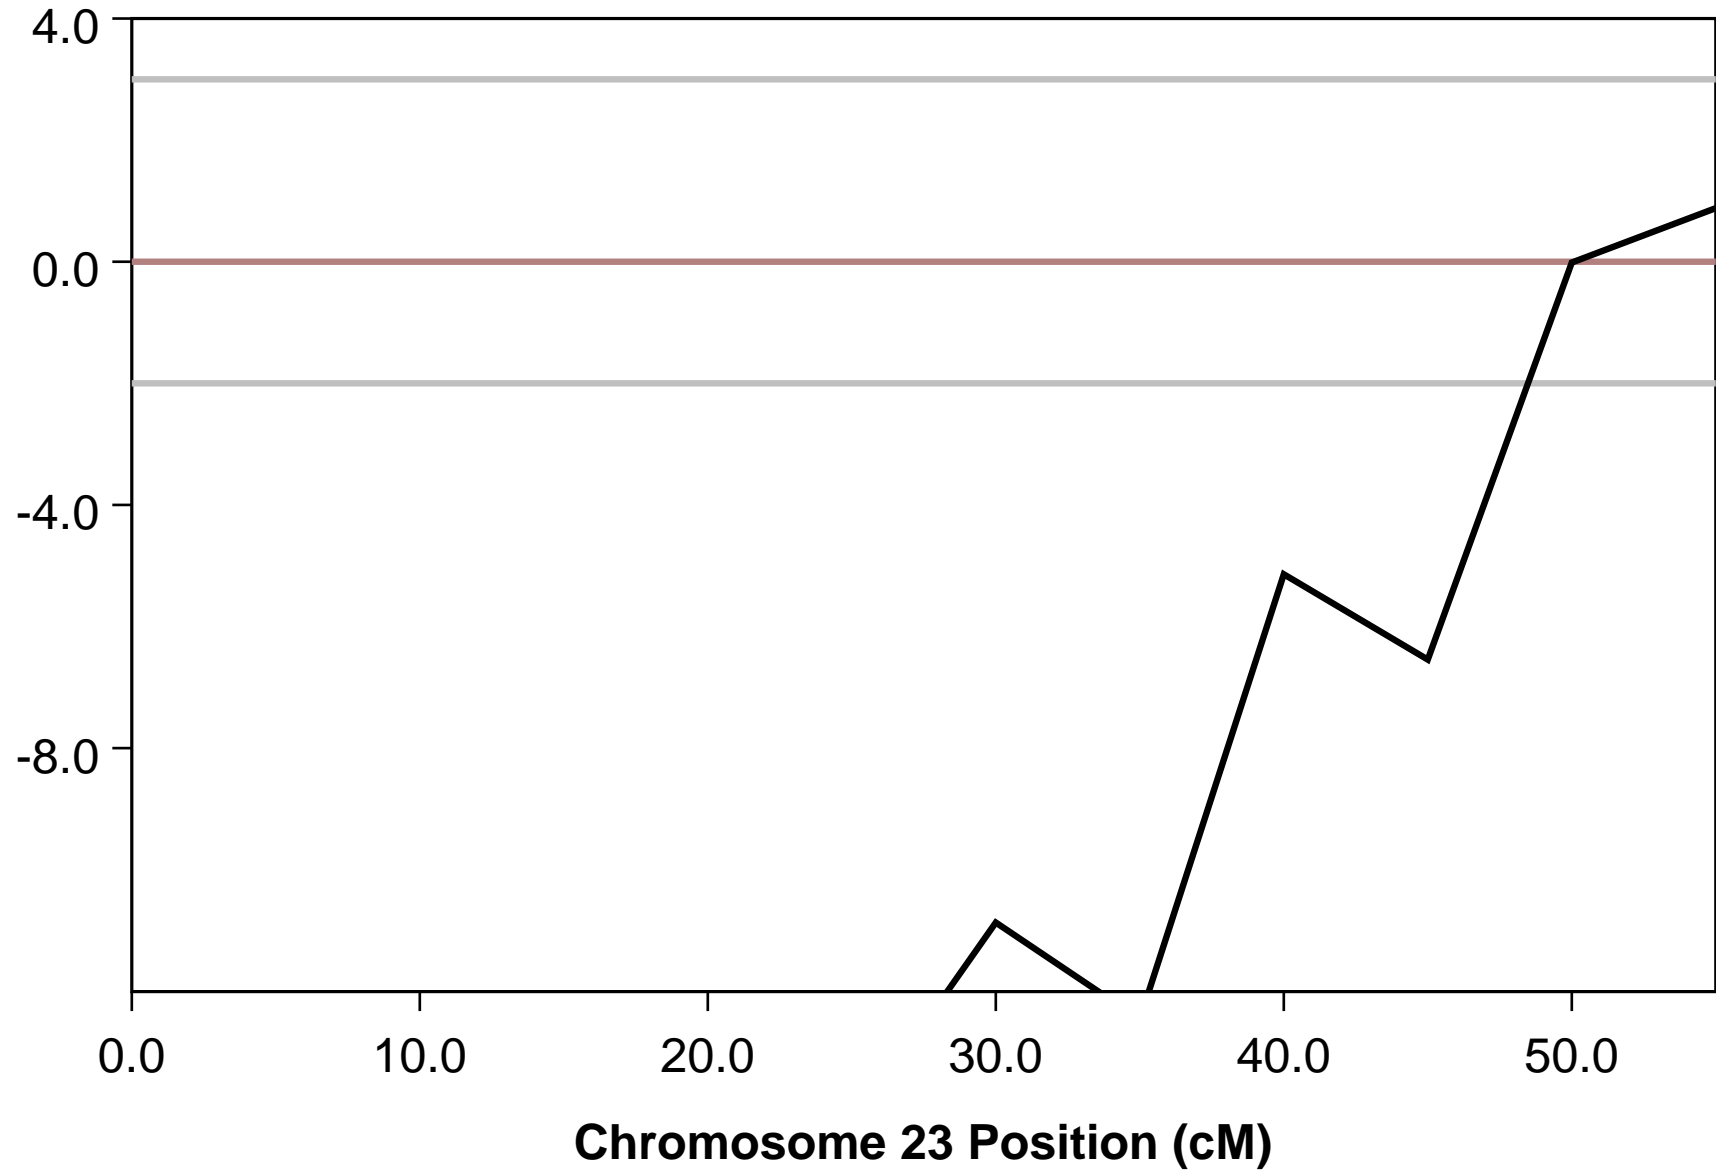

# Parametric Analysis for recessive

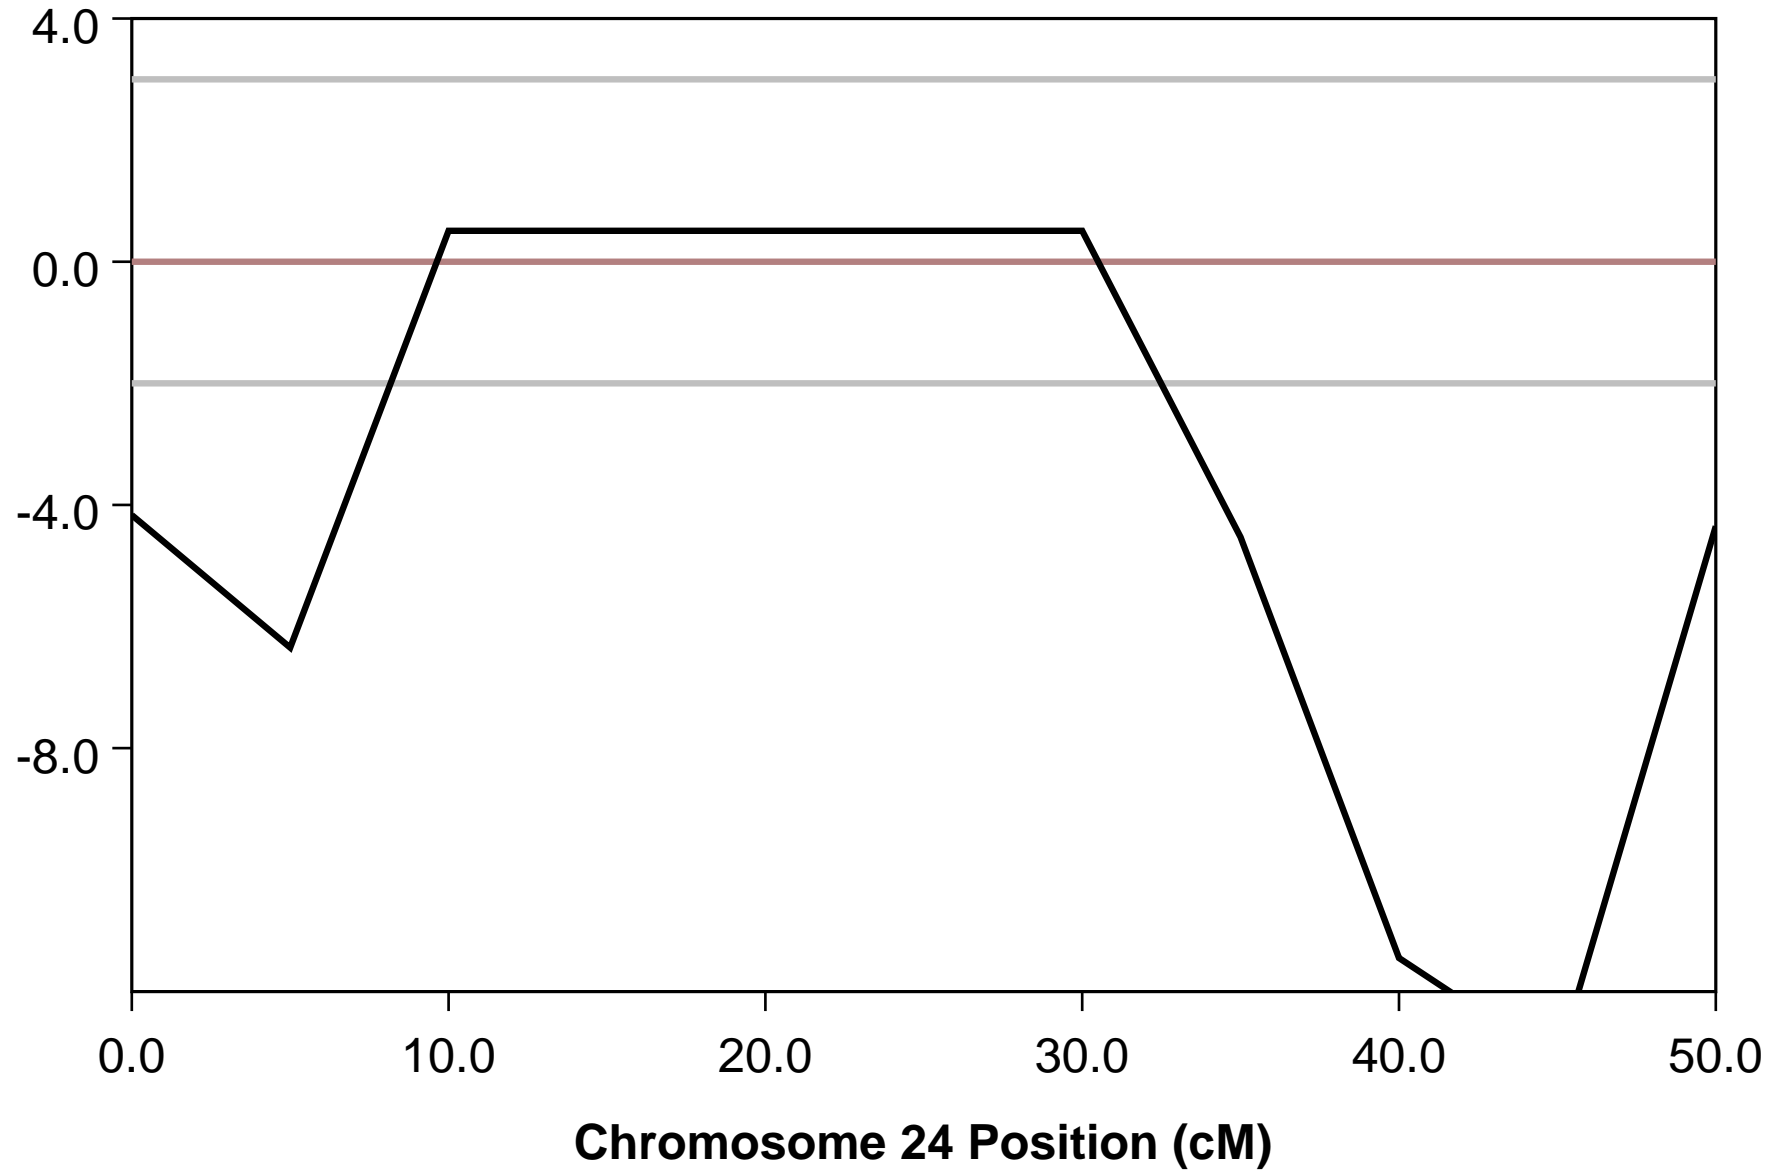



# Parametric Analysis for recessive

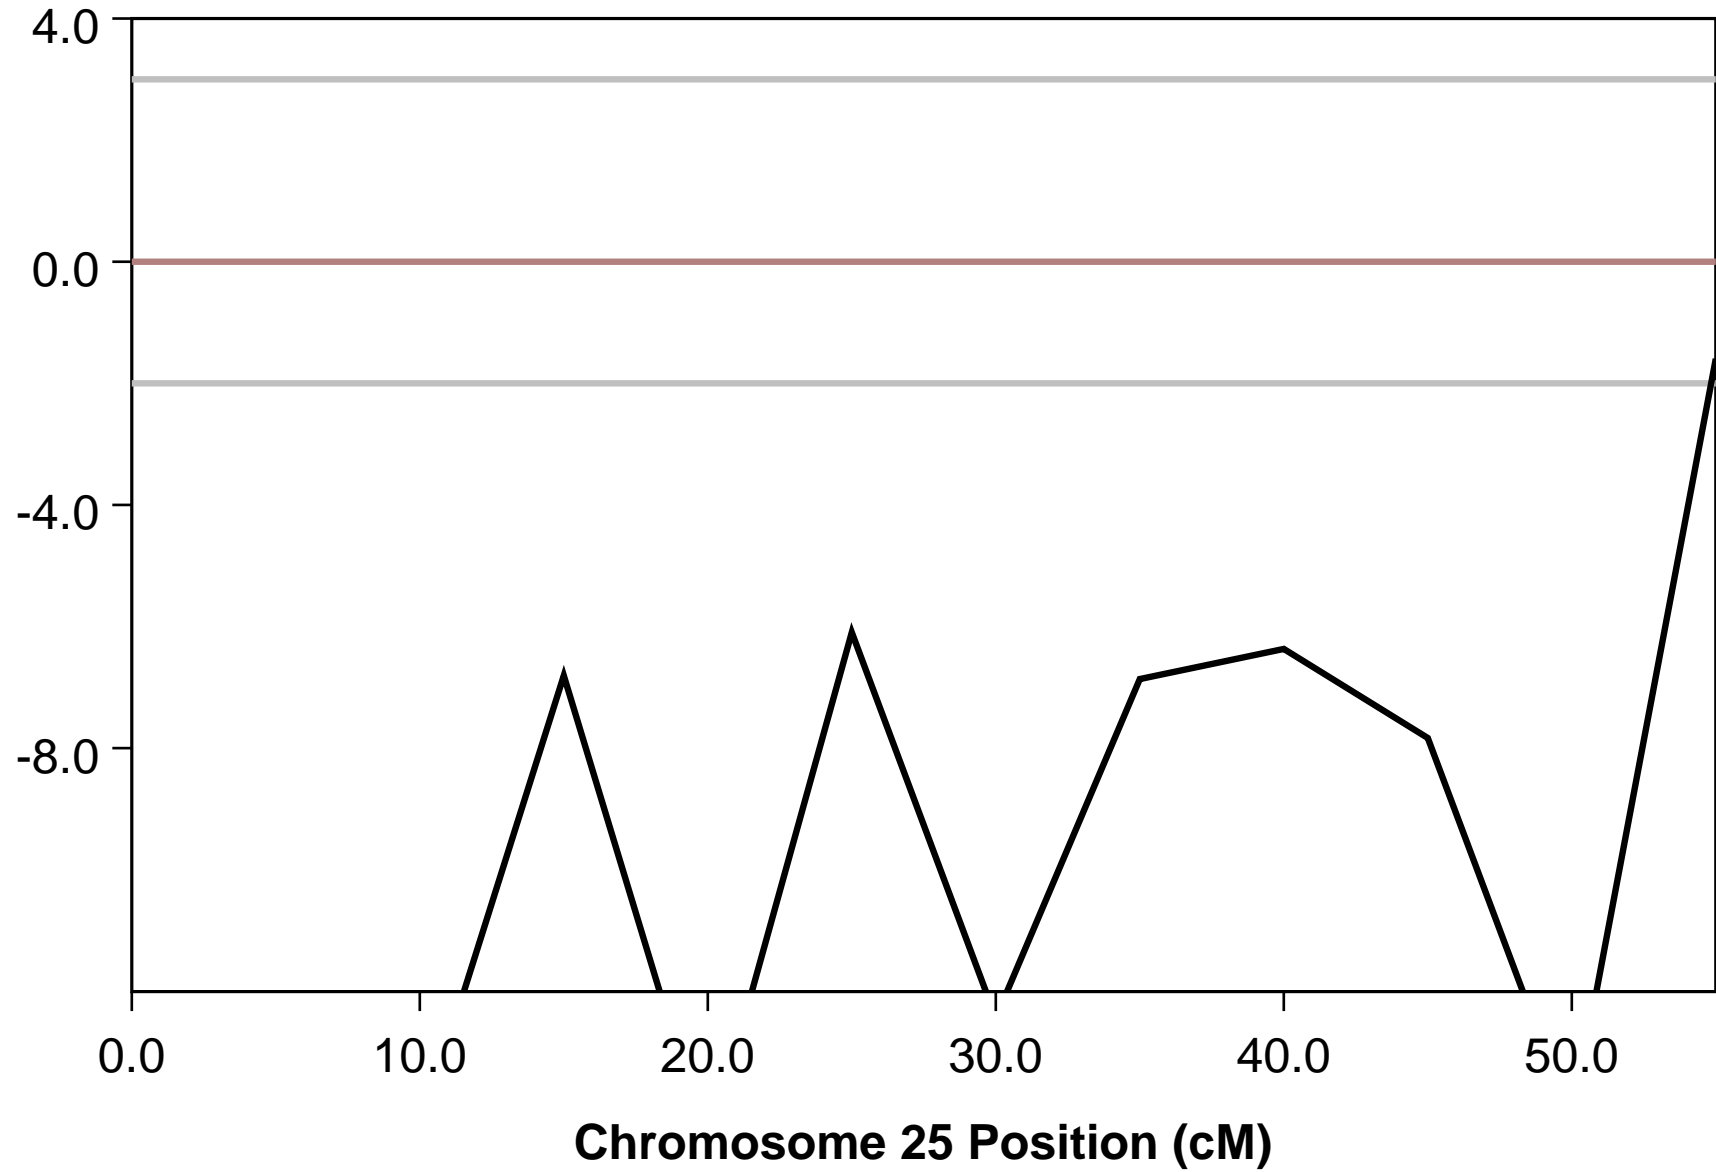

# Parametric Analysis for recessive

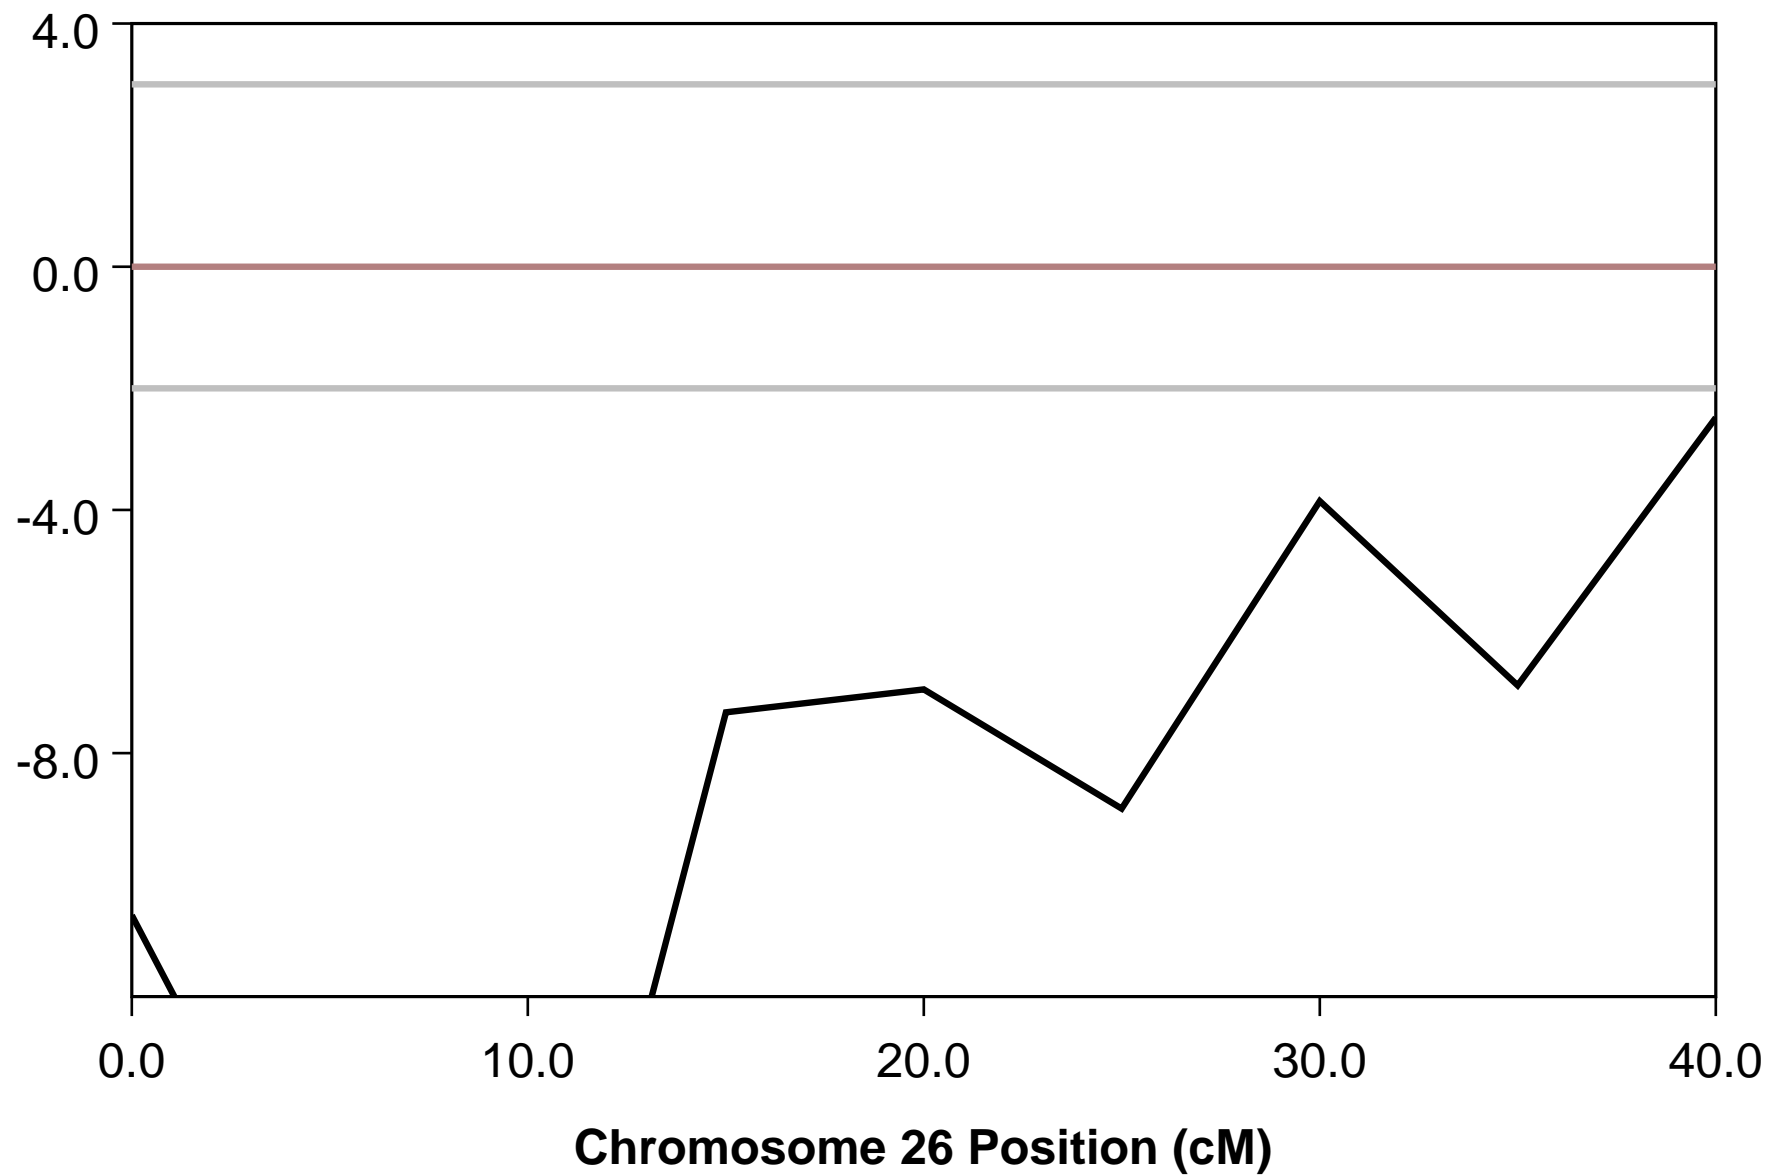

# Parametric Analysis for recessive

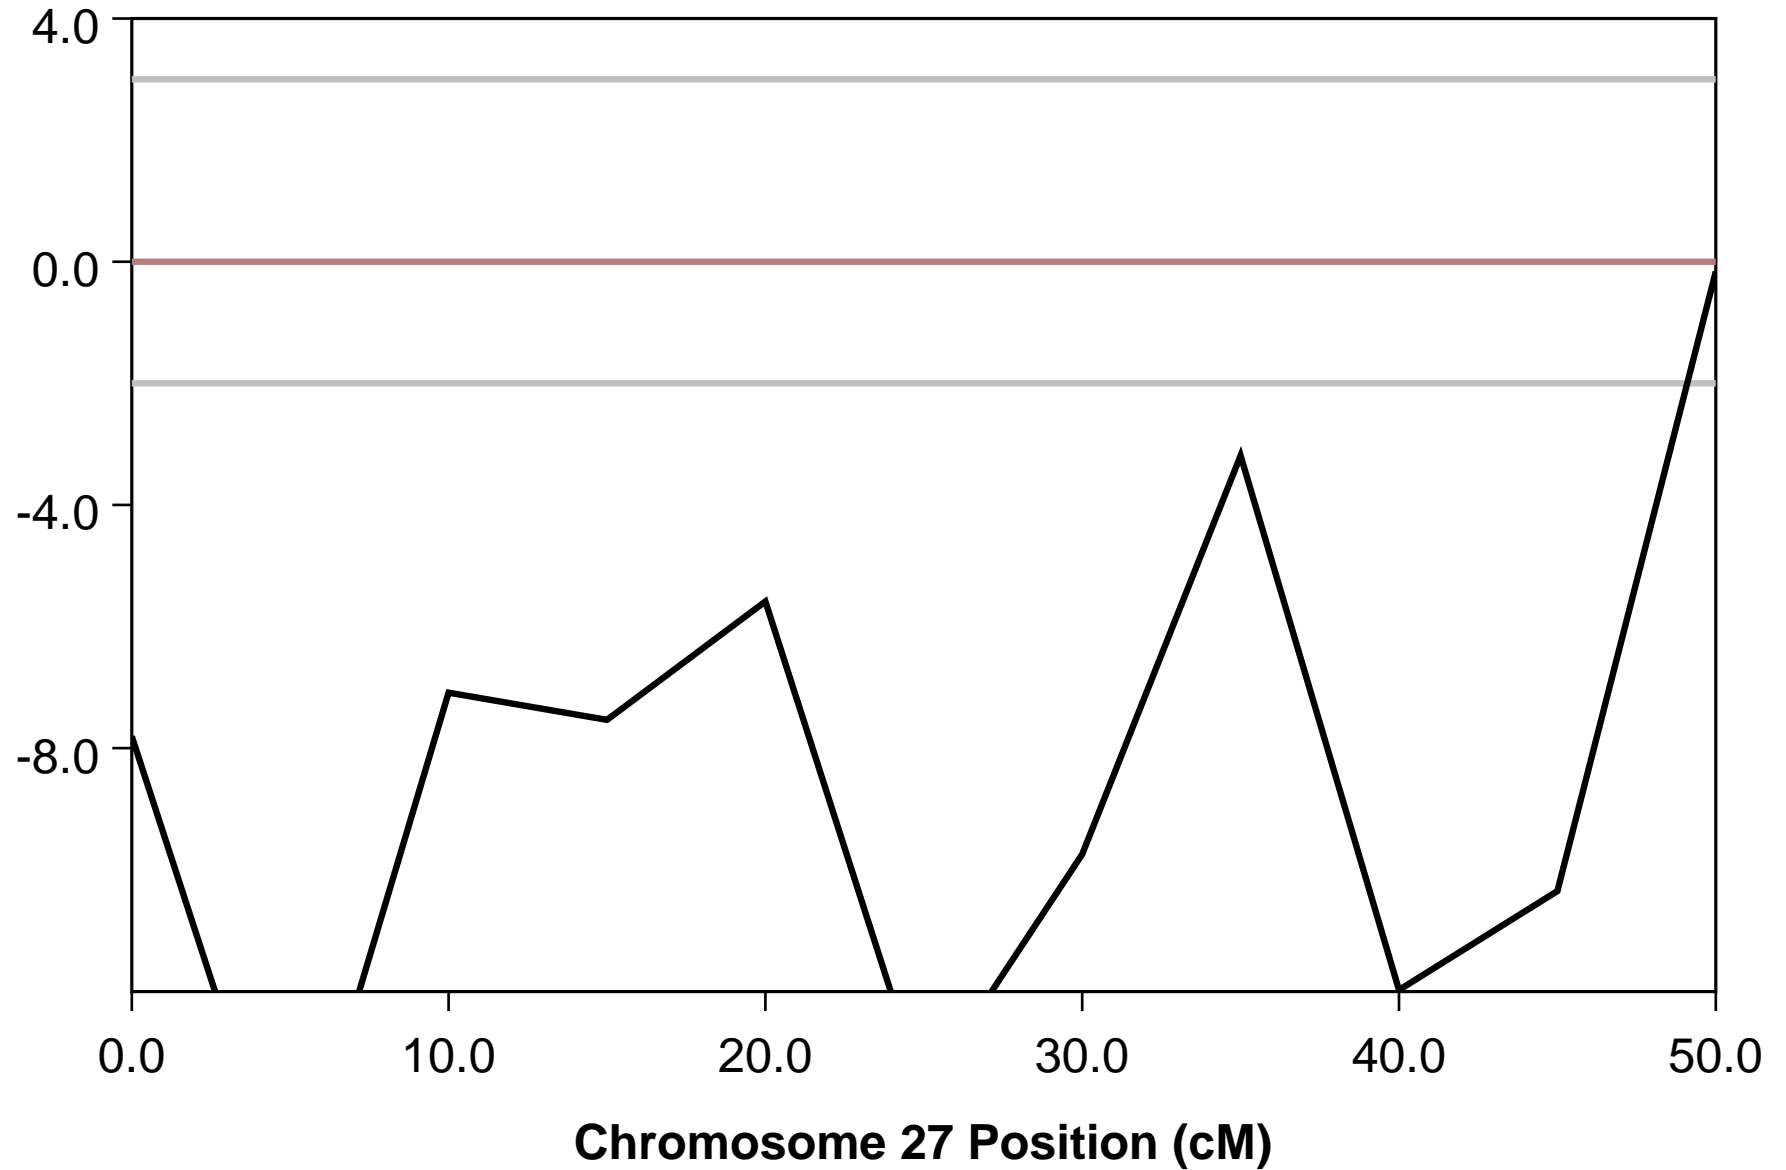

# Parametric Analysis for recessive

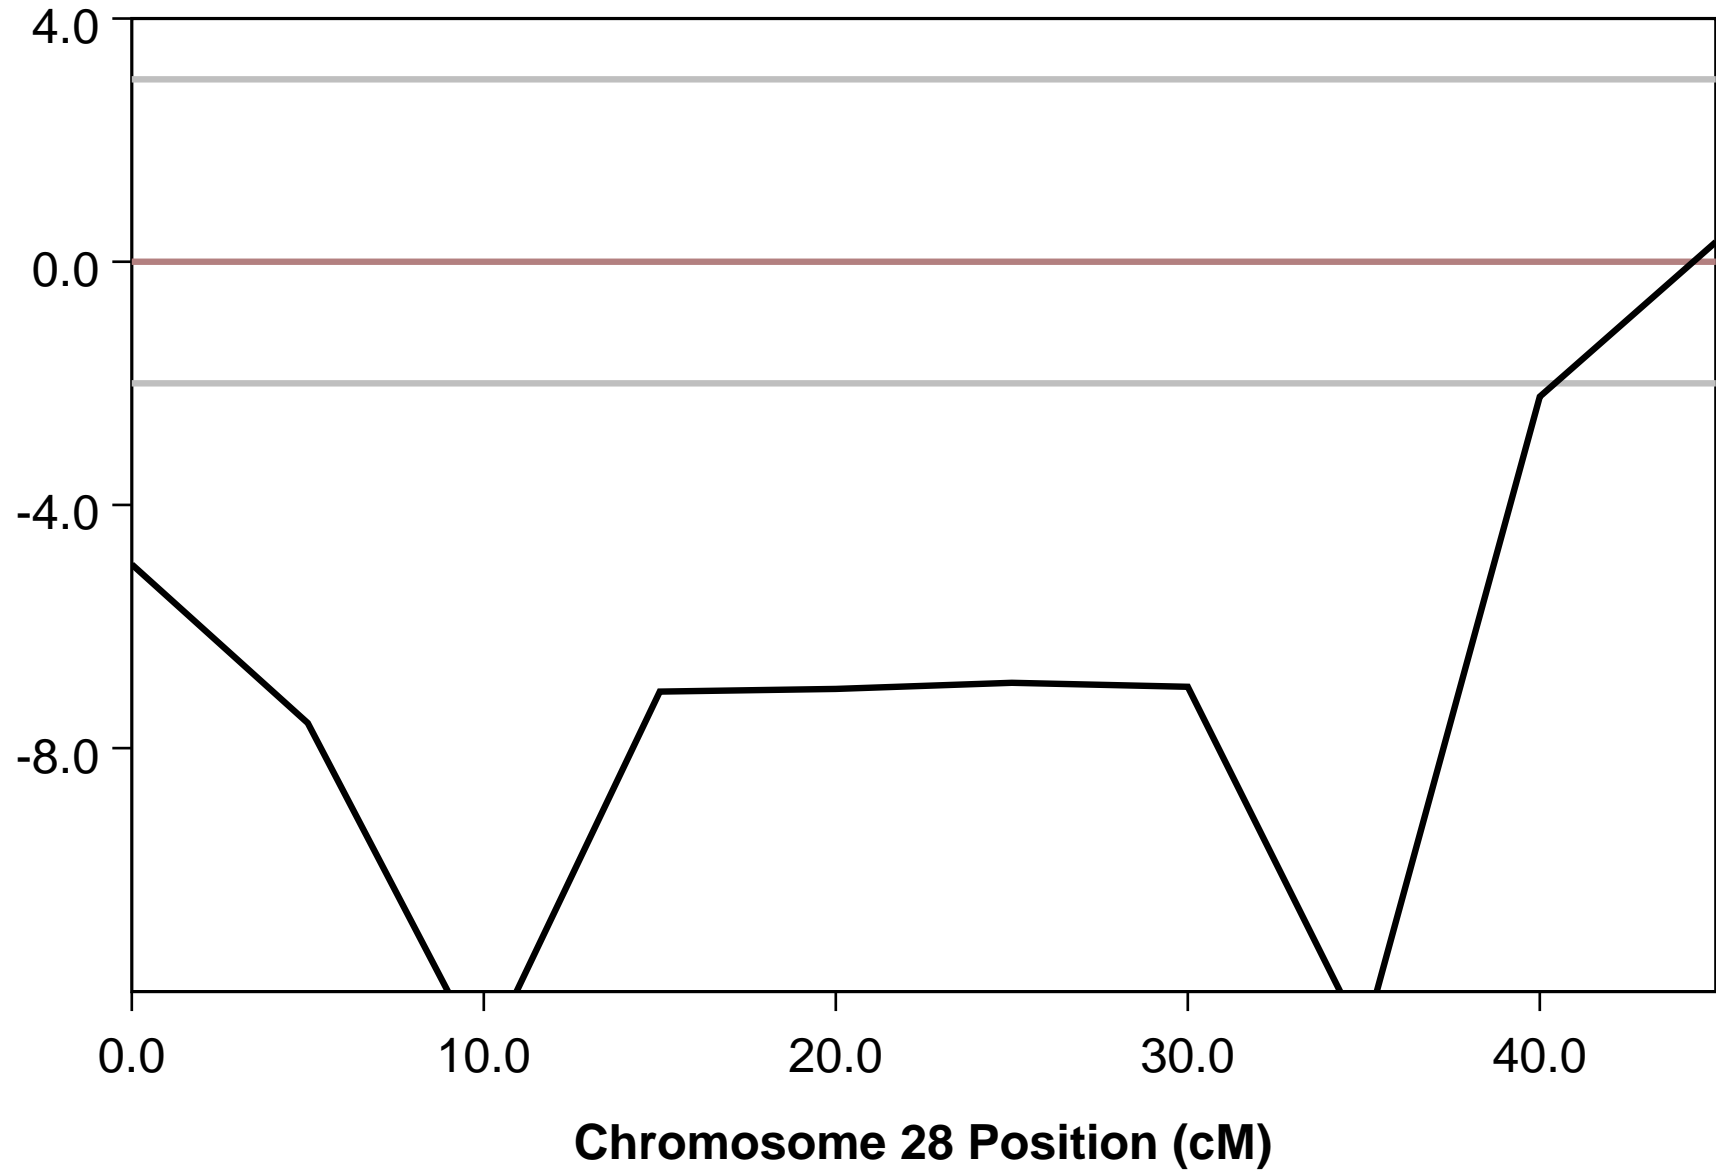

# Parametric Analysis for recessive

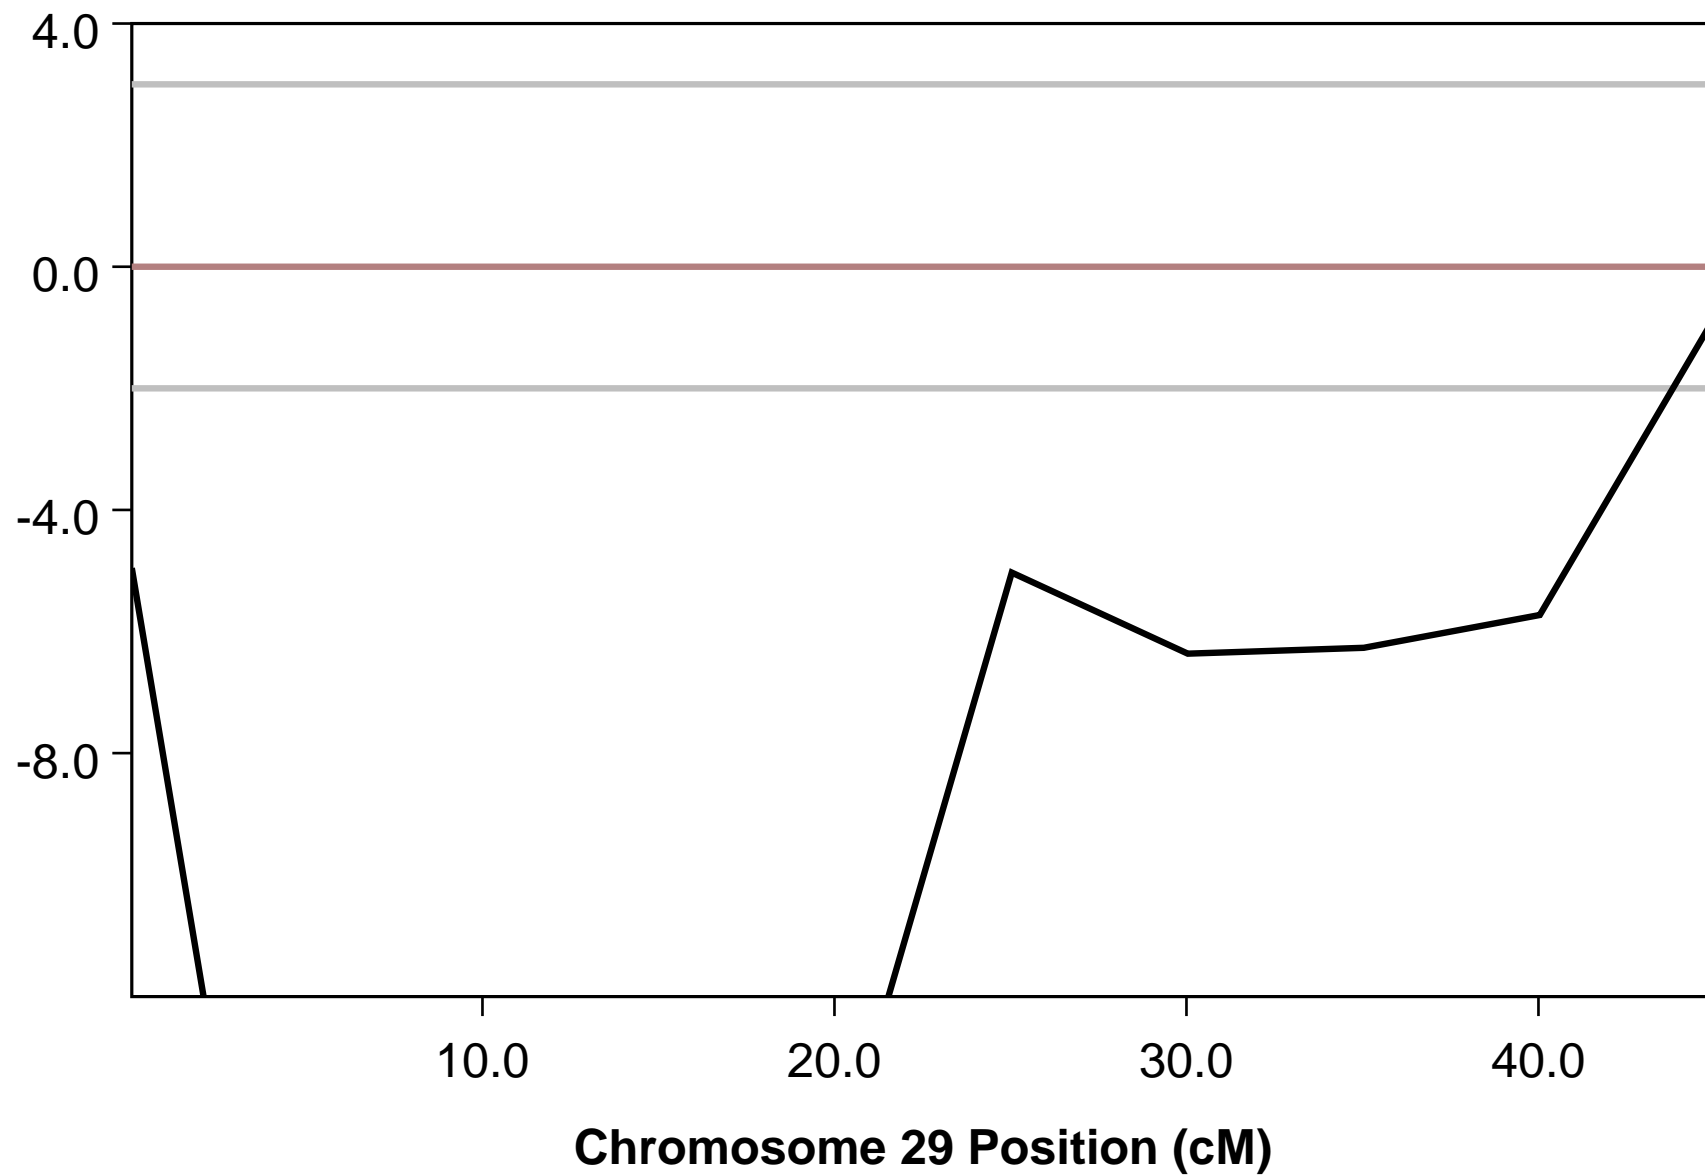

# Parametric Analysis for recessive

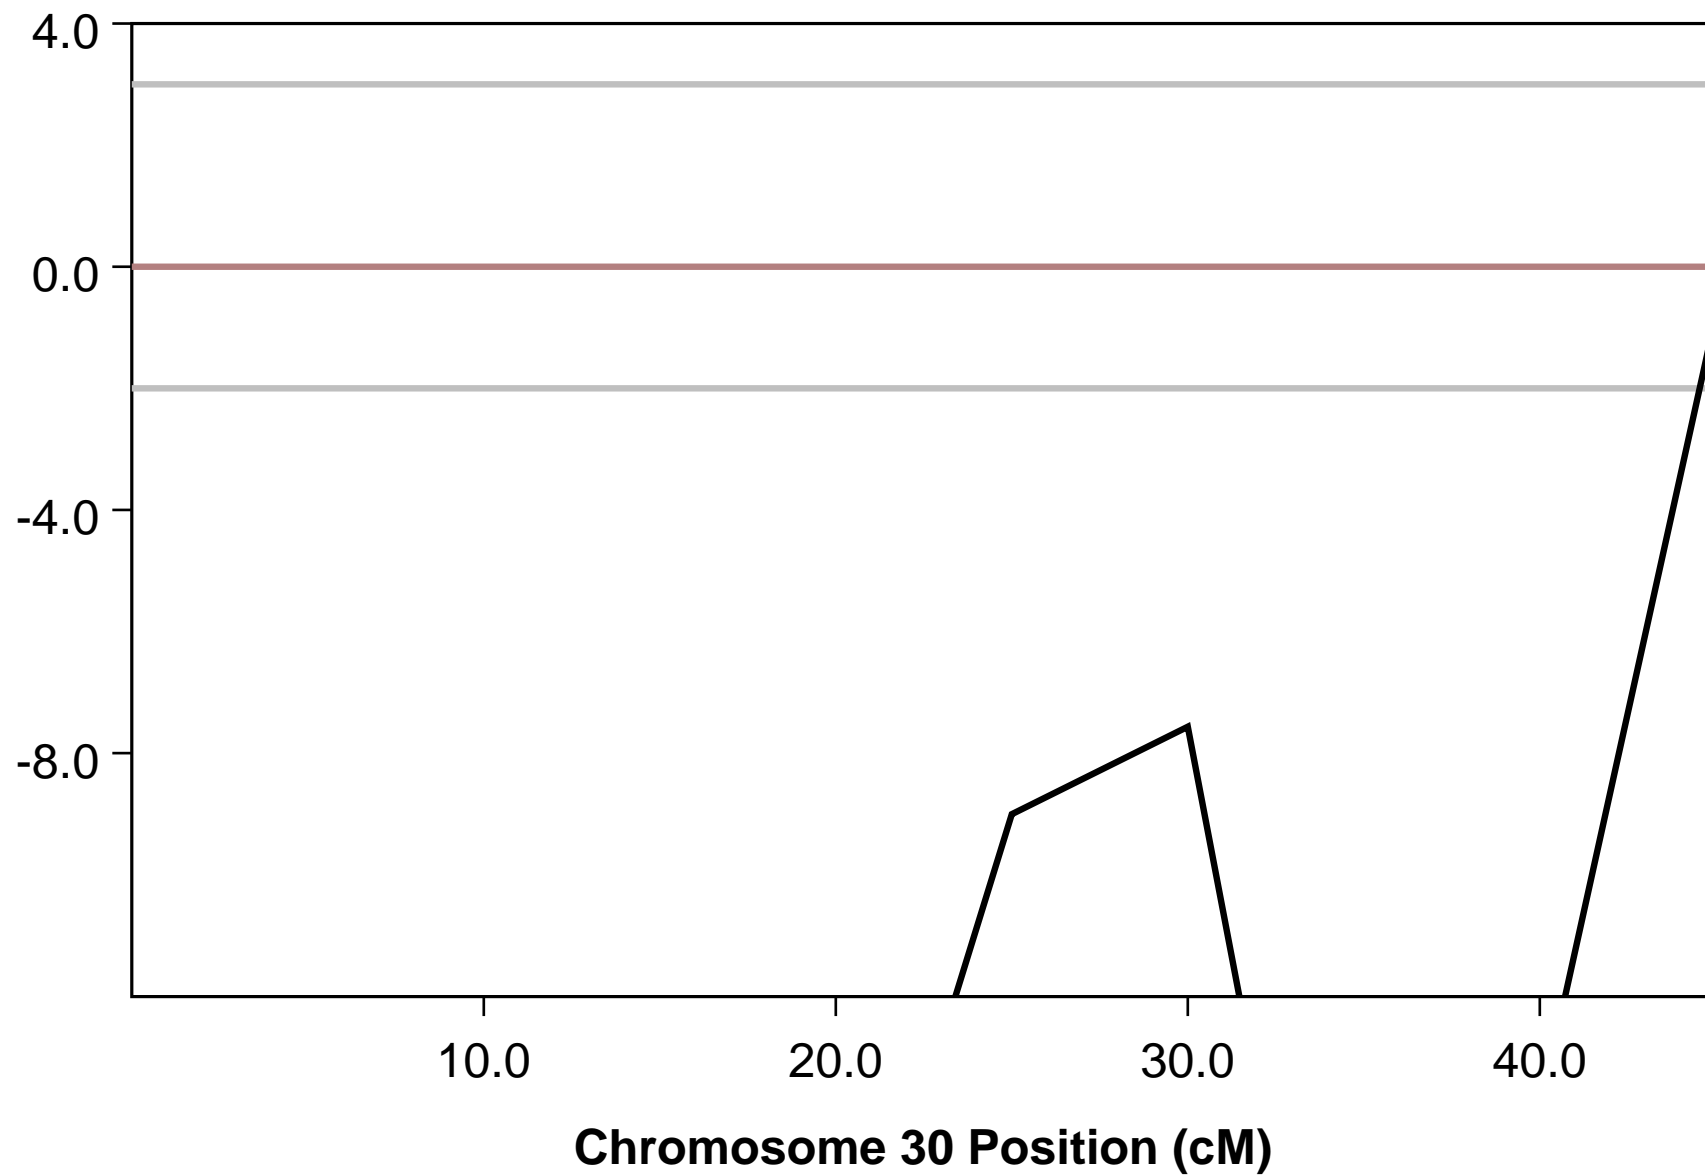

# Parametric Analysis for recessive

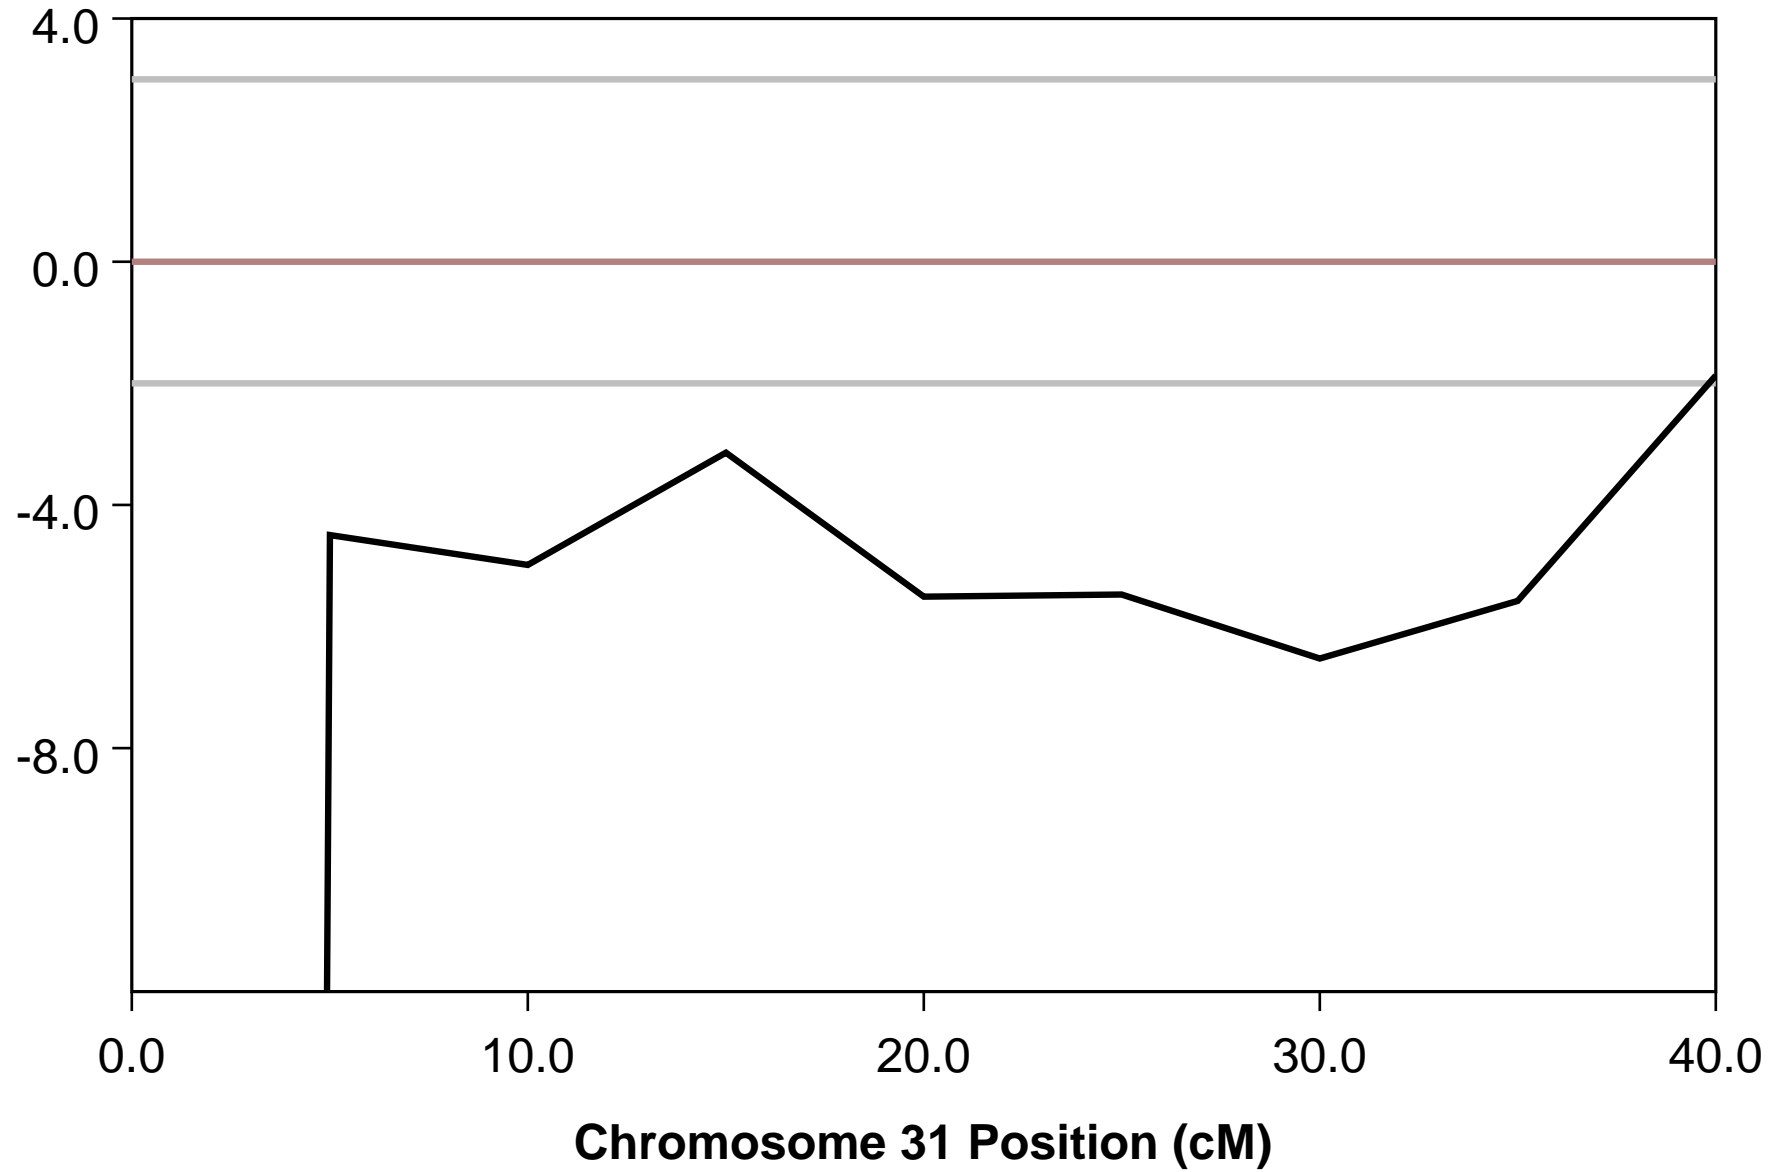

# Parametric Analysis for recessive

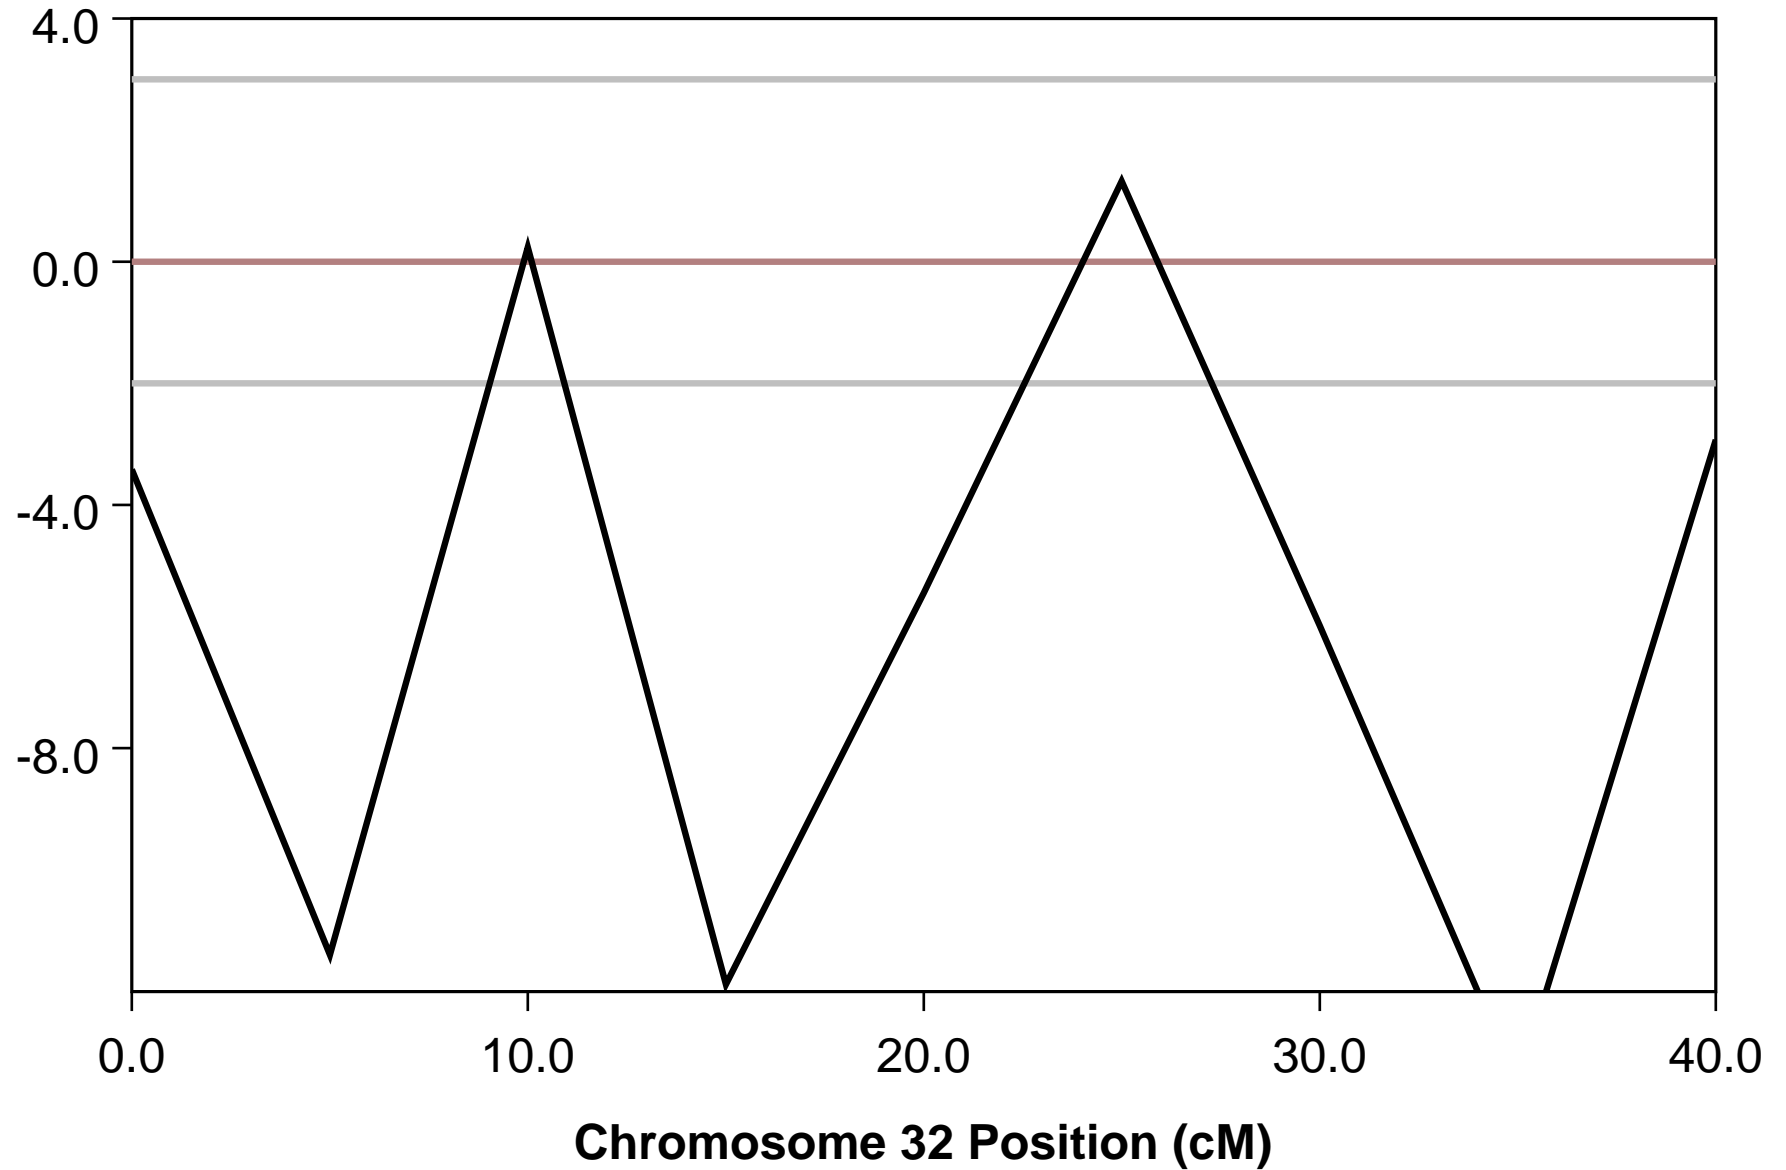



# Parametric Analysis for recessive

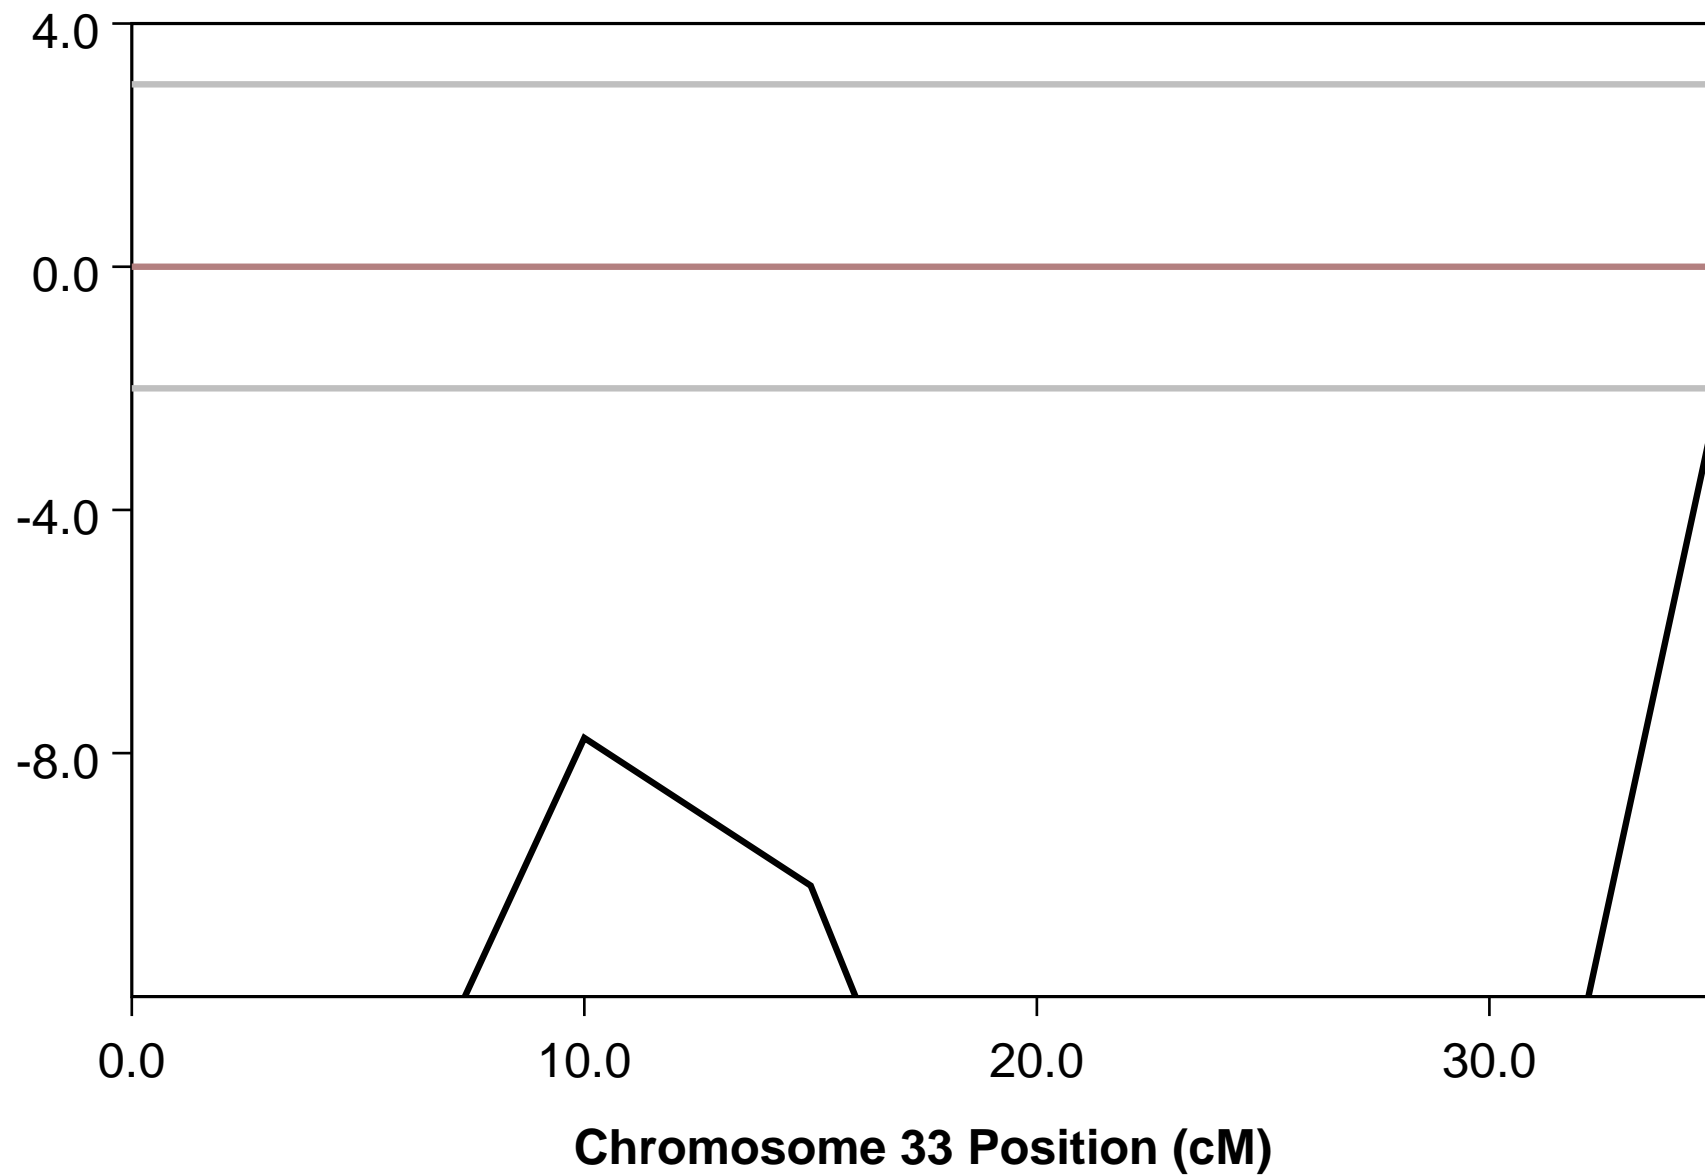

# Parametric Analysis for recessive

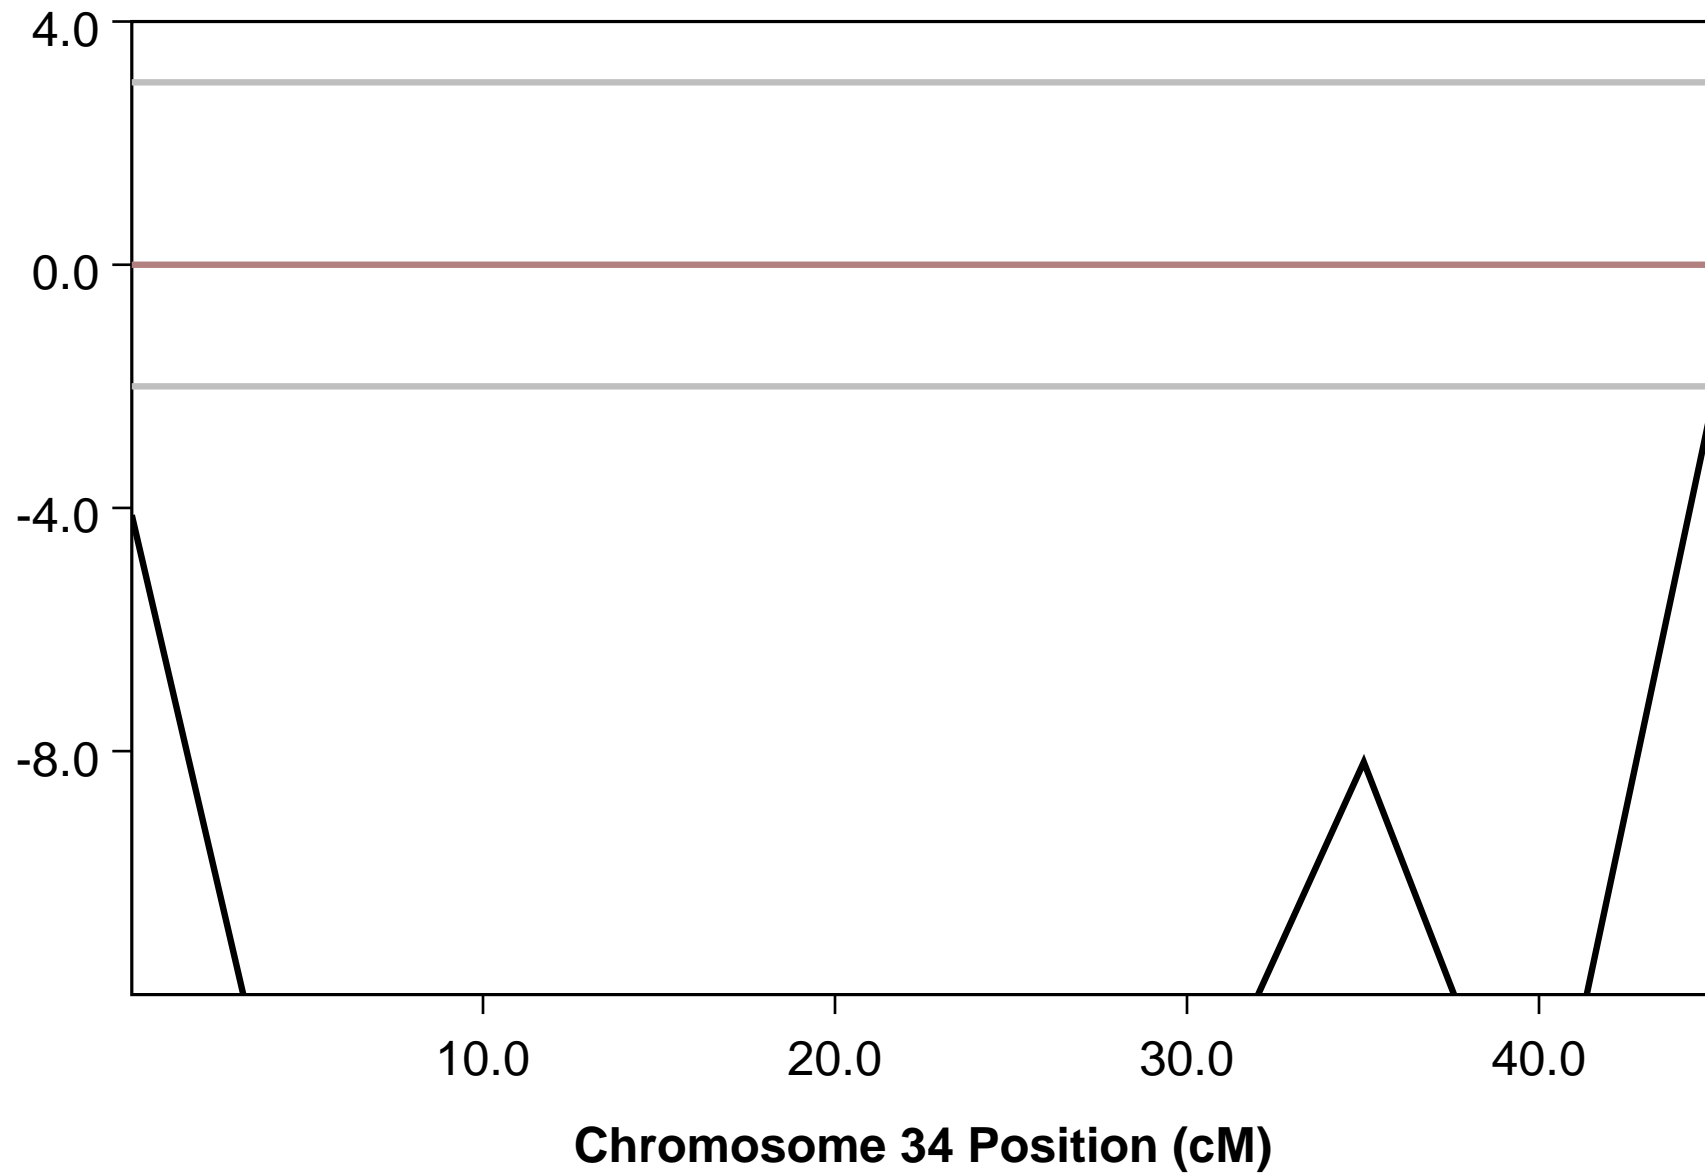

# Parametric Analysis for recessive

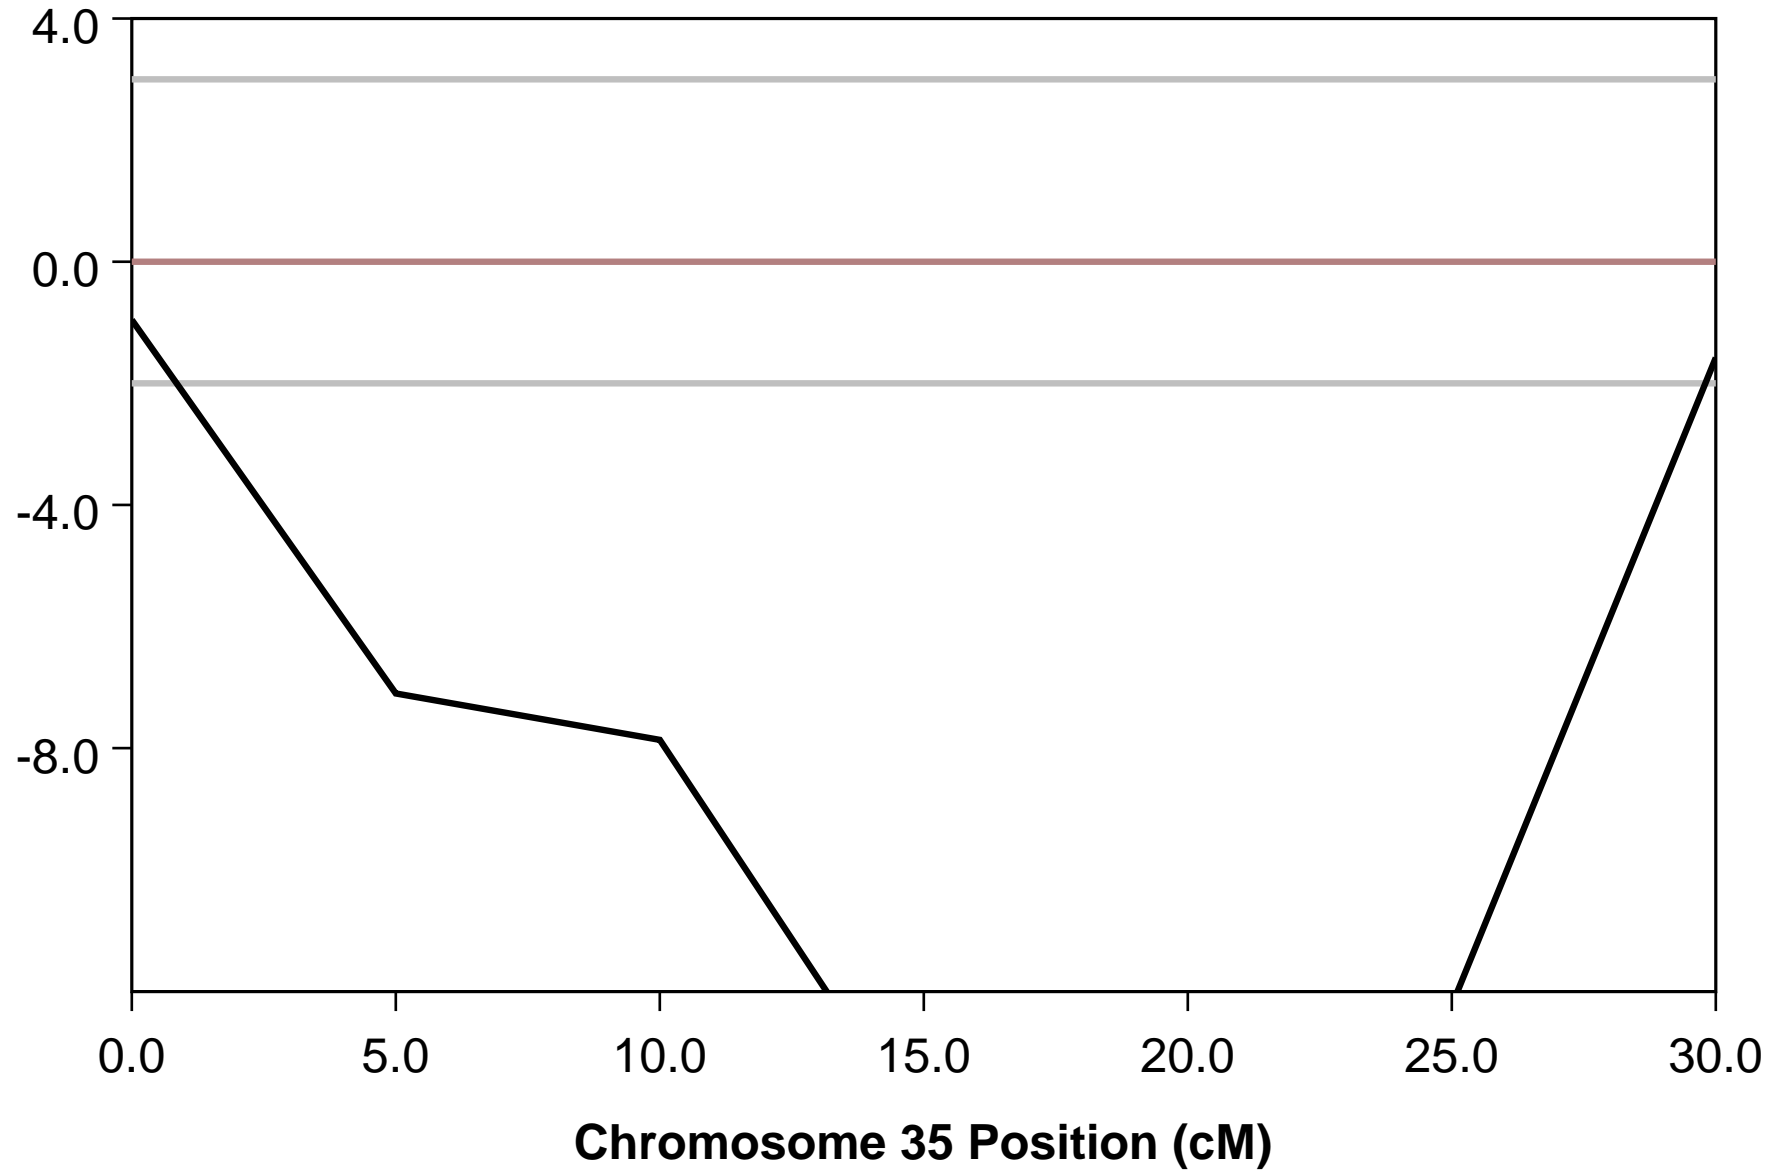

# Parametric Analysis for recessive

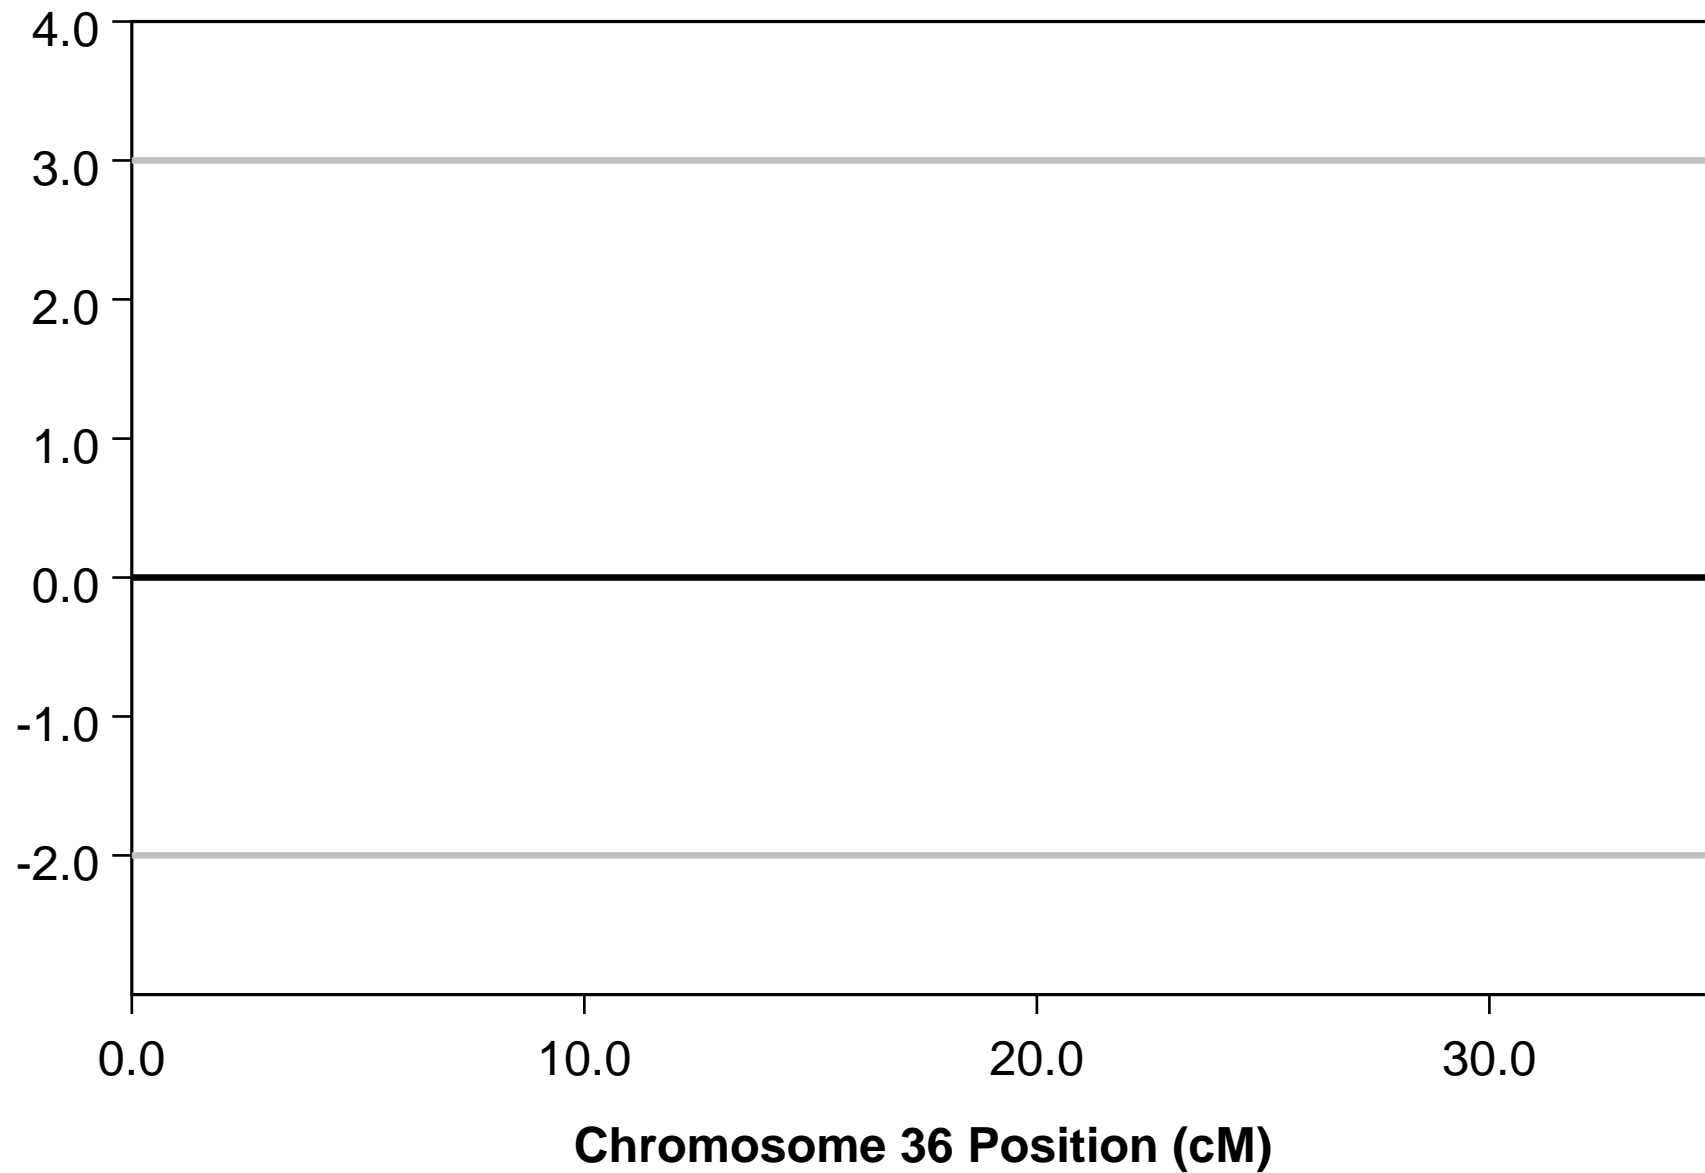

# Parametric Analysis for recessive

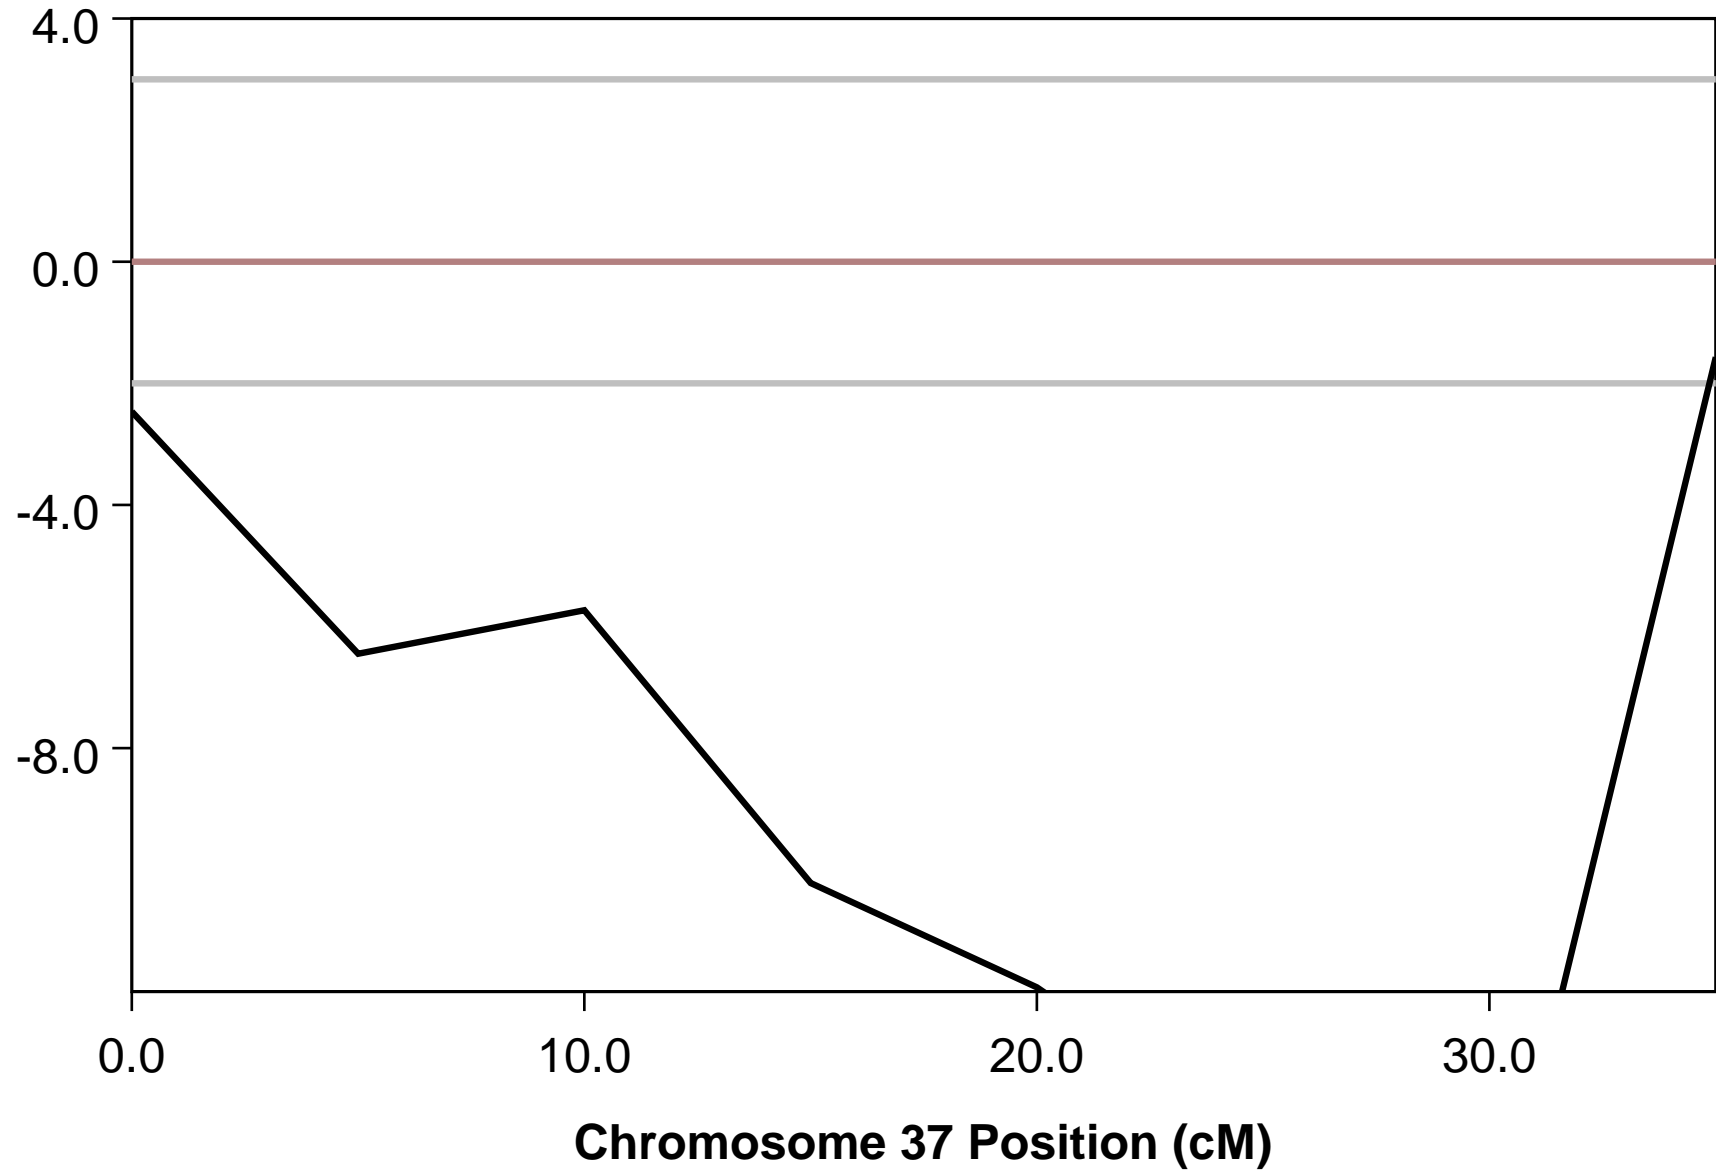

# Parametric Analysis for recessive

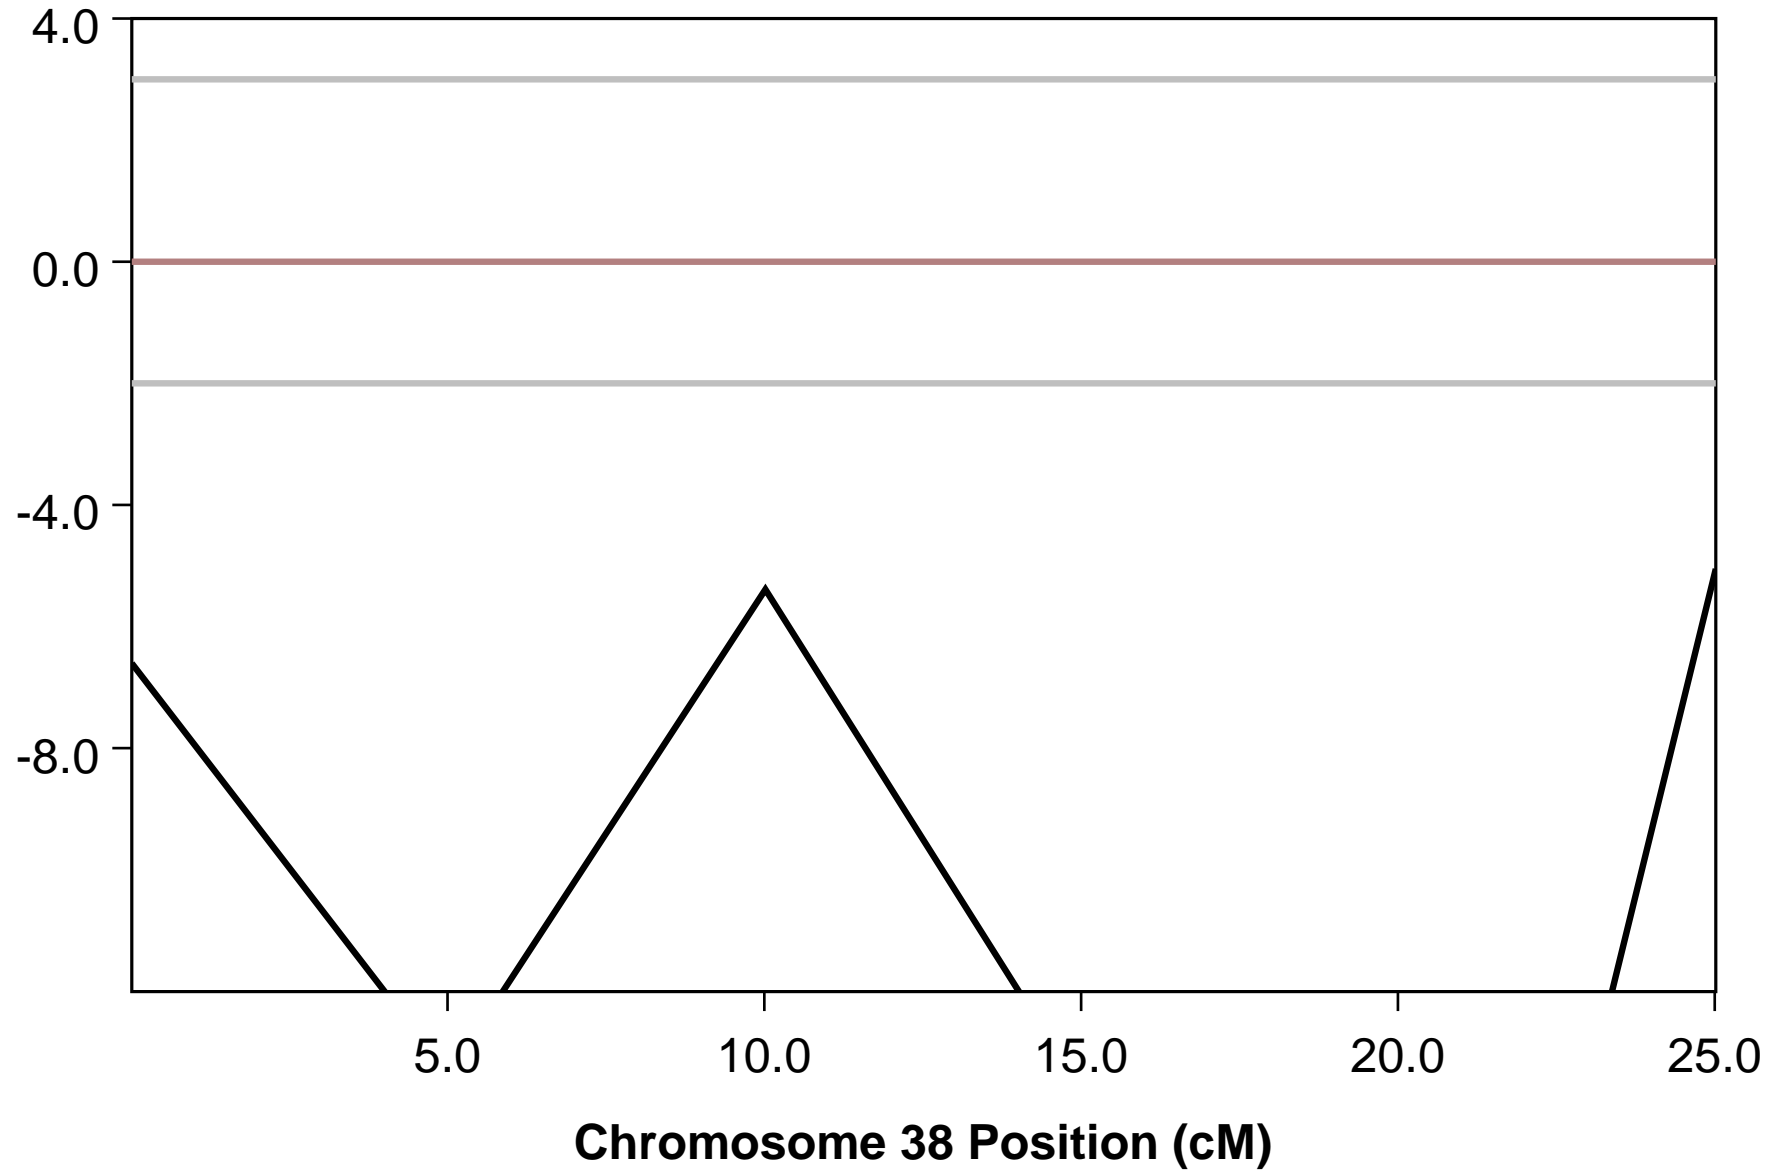

# Parametric Analysis for recessive

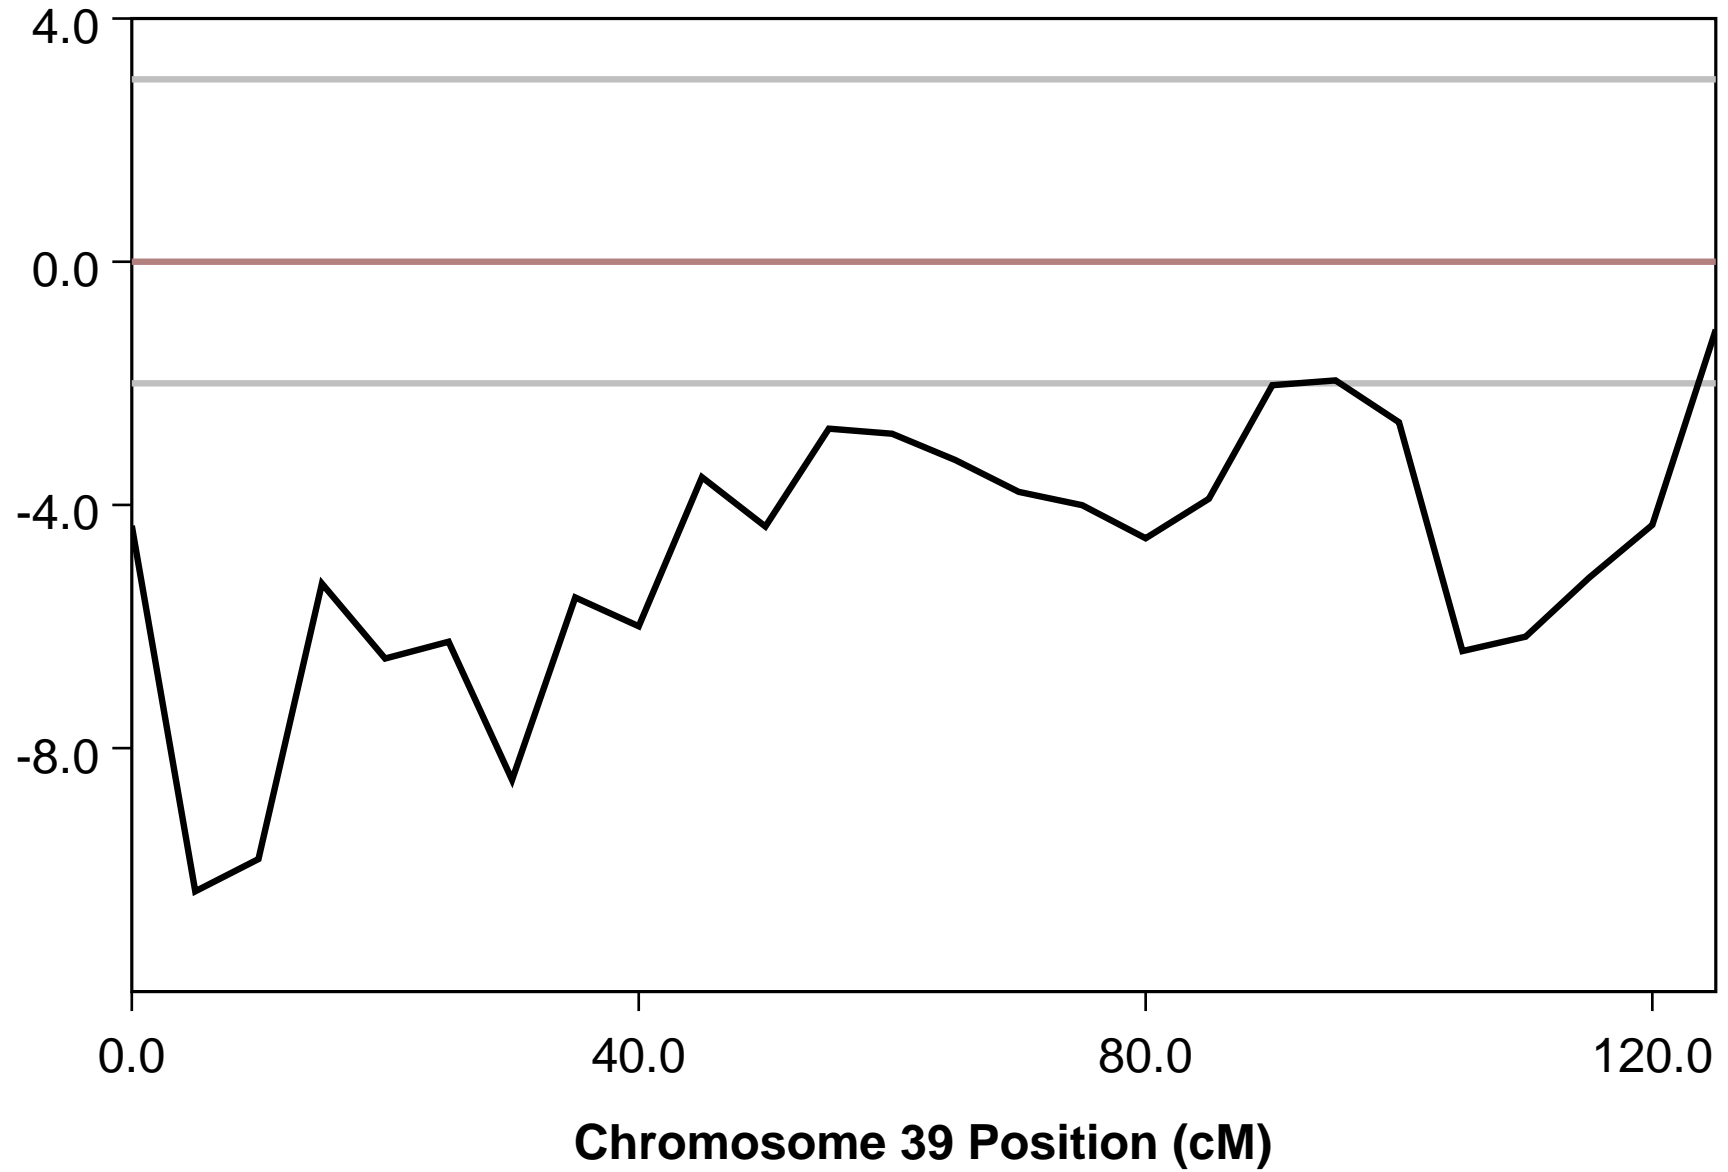

Supplement: pone.0141824.s002.pdf [file pone.0141824.s002.pdf]
