# Supplementary material for: TECPR2 Associated Neuroaxonal Dystrophy in Spanish Water Dogs
Source: PubMed Central journal article supplement (PMC4640708; doi:10.1371/journal.pone.0141824), 2015-11-10
Supplement: pone.0141824.s003.pdf [file pone.0141824.s003.pdf]

|            |                                            |                                             |
|------------|--------------------------------------------|---------------------------------------------|
| TECPR2     | Dog with mutation                          | RTVWARC-----PNGDLARWYGVTDKNPACDYWKKI P      |
|            | Dog ( <i>C. lupus</i> )                    | .....R.....                                 |
| TECPR1     | Dog ( <i>C. lupus</i> )                    | DQVWVIANKVQGS HGLSRGTVCHRTGVQPREPKQGW DYG I |
|            | Human ( <i>H. sapiens</i> )                | *****S*****H**H*****                        |
|            | Chimpanzee ( <i>P. troglodytes</i> )       | *****S*****H**H*****                        |
|            | Rhesus macaque ( <i>M. mulatta</i> )       | *****S*****H**H*****                        |
|            | Marmoset ( <i>C. jacchus</i> )             | *****S*****H**H*****                        |
|            | Gibbon ( <i>N. leucogenys</i> )            | *****S*****H**H*****                        |
|            | Tarsier ( <i>T. syrichta</i> )             | **T****D*****H*****                         |
|            | Galago ( <i>O. garrettii</i> )             | *****S*****H*****                           |
|            | Rat ( <i>R. norvegicus</i> )               | *****R*M*****                               |
|            | Mouse ( <i>M. musculus</i> )               | *****R*M*****                               |
|            | Hamster ( <i>C. griseus</i> )              | *****R*M*****S*****                         |
|            | Chinchilla ( <i>C. lanigera</i> )          | *****T*****R*****                           |
|            | Blind mole rat ( <i>N. galii</i> )         | *****S*****R*****                           |
|            | Squirrel ( <i>I. tridecemlineatus</i> )    | *****S*****R*****                           |
|            | Egyptian jerboa ( <i>J. jaculus</i> )      | *****S*****R*****                           |
|            | Guinea pig ( <i>C. porcellus</i> )         | *****T*****R*****                           |
|            | Degu ( <i>O. degus</i> )                   | *****T*****R*****                           |
|            | Cattle ( <i>B. taurus</i> )                | *****D*****S*****R*****SL*****              |
|            | Sheep ( <i>O. aries</i> )                  | *****D*****S*****R*****SL*****              |
|            | Horse ( <i>E. przewalskii</i> )            | *****S*****H*****                           |
|            | Rabbit ( <i>O. cuniculus</i> )             | *****D*****H**R*****                        |
|            | Cat ( <i>F. catus</i> )                    | *****S*****                                 |
|            | Pig ( <i>S. scrofa</i> )                   | *****D*****L***L*****                       |
|            | Ferret ( <i>M. putorius furo</i> )         | ***I**D**P**RSM*****M*****                  |
|            | Killer whale ( <i>O. orca</i> )            | *****S*****R*****L*****                     |
|            | Tasmanian devil ( <i>S. harrisii</i> )     | *****S**C*****                              |
|            | Canary ( <i>S. canaria</i> )               | *****D*****S**C*****I***L***LS*****         |
|            | Eagle ( <i>H. leucocephalus</i> )          | **L***D*****S**C*****M***LS*****            |
|            | Pelican ( <i>P. crispus</i> )              | *****D*****S**C*****M***LA*****             |
|            | Chicken ( <i>G. gallus</i> )               | *****D*****S**C*****M***LA*****             |
|            | Budgerigar ( <i>M. undulatus</i> )         | *****D*****S**C*****M***LS*****             |
|            | Guppy ( <i>P. reticulata</i> )             | **L*I**D*****S**C*****L***M***S*****        |
|            | Zebrafish ( <i>D. rerio</i> )              | ***I**D**S*HPAE*S*****L**K*MQ**LS*****      |
|            | Turtle ( <i>C. picta bellii</i> )          | *****D*****S**C*****L***LS*****             |
|            | Clawed frog ( <i>X. tropicalis</i> )       | **I***D*****S**C*****L***MQL**HS*****       |
|            | Python ( <i>P. bivittatus</i> )            | **I***D*****S**C*****R**M***LS*****         |
|            | Alligator ( <i>A. mississippiensis</i> )   | *****D*****S**C*****K***L***LS*****         |
|            | Coelacanth ( <i>L. chalumnae</i> )         | ***I**D*****S**C*****V*I**M**I**S*****      |
|            | Shark ( <i>C. milii</i> )                  | ***I**D*****S**C*****L**M**HS*****          |
|            | Purple sea urchin ( <i>S. purpuratus</i> ) | *****DQ*D*A----*V**R*D*IASAK**M**KA**K*A    |
|            | <i>Saccoglossus kowalevskii</i>            | N**IL*A**DA*----*K**R*L**SSDN**T**L**       |
|            | Dog roundworm ( <i>T. canis</i> )          | AS**LLT-----DG*QLFL*I*ICANIL*EY*YQLD        |
| Peroxin 23 | Fruit fly ( <i>D. melanogaster</i> )       | SE**AIS-----LN**I**R*C*ITEEN*A*V**NL**      |
