# Supplementary material for: TECPR2 Associated Neuroaxonal Dystrophy in Spanish Water Dogs
Source: PubMed Central journal article supplement (PMC4640708; doi:10.1371/journal.pone.0141824), 2015-11-10
Supplement: pone.0141824.s006.pdf [file pone.0141824.s006.pdf]

**S2 Table:** GeneBank accession numbers used for the TECPR2 and TECPR1 alignments.

| Species                           | GeneBank accession number<br>TECPR2 | GeneBank accession<br>number<br>TECPR1/Peroxin 23 |
|-----------------------------------|-------------------------------------|---------------------------------------------------|
| <i>C. lupus</i>                   | XP_005623885.1                      | XP_546986.4                                       |
| <i>H. sapiens</i>                 | XP_005268303.1                      | AAH53591.1                                        |
| <i>P. troglodytes</i>             | XP_009426768.1                      | XP_009451946.1                                    |
| <i>M. mulatta</i>                 | AFJ70931.1                          | AFE77616.1                                        |
| <i>C. jacchus</i>                 | JAB46771.1                          | JAB48654.1                                        |
| <i>N. leucogenys</i>              | XP_003276268.1                      | XP_004090980.1                                    |
| <i>T. syrichta</i>                | XP_008062282.1                      | XP_008071091.1                                    |
| <i>O. garnettii</i>               | XP_003799373.1                      | XP_003798974.1                                    |
| <i>R. norvegicus</i>              | XP_008763192.1                      | NP_001032268.1                                    |
| <i>M. musculus</i>                | NP_001276439.1                      | NP_081686.1                                       |
| <i>C. griseus</i>                 | XP_007624662.1                      | EGW02538.1                                        |
| <i>C. lanigera</i>                | XP_005410807.1                      | XP_005397968.1                                    |
| <i>N. galili</i>                  | XP_008823812.1                      | XP_008822244.1                                    |
| <i>I. tridecemlineatus</i>        | XP_005341060.1                      | XP_005339780.1                                    |
| <i>J. jaculus</i>                 | XP_004665590.1                      | XP_004666407.1                                    |
| <i>C. porcellus</i>               | XP_003463177.2                      | XP_003469934.1                                    |
| <i>O. degus</i>                   | XP_004645455.1                      | XP_004629763.1                                    |
| <i>B. taurus</i>                  | NP_001179619.1                      | XP_010824155.1                                    |
| <i>O. aries</i>                   | XP_004018206.1                      | XP_004021346.1                                    |
| <i>E. caballus/E. przewalskii</i> | XP_001491516.3                      | XP_008514290.1                                    |
| <i>O. cuniculus</i>               | XP_008246877.1                      | XP_008249440.1                                    |
| <i>F. catus</i>                   | XP_003988050.1                      | XP_003998502.1                                    |
| <i>S. scrofa</i>                  | XP_003482366.1                      | XP_003124363.2                                    |
| <i>M. putorius furo</i>           | XP_004796722.1                      | XP_004775015.1                                    |
| <i>O. orca</i>                    | XP_004262466.1                      | XP_004269089.1                                    |
| <i>S. harrisii</i>                | XP_003756583.1                      | XP_003761538.1                                    |
| <i>S. canaria</i>                 | XP_009099981.1                      | XP_009090096.1                                    |
| <i>H. leucocephalus</i>           | XP_010582268.1                      | XP_010568535.1                                    |
| <i>P. crispus</i>                 | XP_009481196.1                      | XP_009476684.1                                    |
| <i>G. gallus</i>                  | XP_421376.4                         | E1BZR9.1                                          |
| <i>M. undulatus</i>               | XP_005149617.1                      | XP_005145341.1                                    |
| <i>P. reticulata</i>              | XP_008396922.1                      | XP_008436384.1                                    |
| <i>D. rerio</i>                   | XP_005158848.1                      | XP_002661342.3                                    |
| <i>C. picta bellii</i>            | XP_008166397.1                      | XP_008162871.1                                    |
| <i>X. tropicalis</i>              | XP_002936632.2                      | NP_001107288.1                                    |
| <i>P. bivittatus</i>              | XP_007435199.1                      | XP_007425221.1                                    |
| <i>A. mississippiensis</i>        | XP_006270459.1                      | XP_006265339.1                                    |
| <i>L. chalumnae</i>               | XP_006010486.1                      | XP_006000845.1                                    |
| <i>C. milii</i>                   | XP_007886502.1                      | XP_007891753.1                                    |
| <i>S. purpuratus</i>              |                                     | XP_796102.3                                       |
| <i>S. kowalevskii</i>             |                                     | XP_006811775.1                                    |
| <i>T. canis</i>                   |                                     | KHN83943.1                                        |
| <i>D. melanogaster</i>            |                                     | AAF49038.2                                        |
